# Supplementary material for: New P,Nsp3ligands for palladium-catalyzed asymmetric allylic substitutions
Source: Royal Society of Chemistry journal article supplement (doi:10.1039/d3ob00519d), 2023-01-01
Supplement: d3ob00519d1.pdf [file d3ob00519d1.pdf]

## New P,N<sub>sp3</sub> ligands for palladium-catalyzed asymmetric allylic substitutions

Qin Su<sup>a</sup>, Chuan-Jin Hou<sup>\*,a</sup>, De-Quan Wei<sup>a,b</sup>, Hao Qin<sup>a</sup>, Ding-Hua Liang<sup>a</sup>, Xiang-Ping Hu<sup>\*,b</sup>

<sup>a</sup> School of Light Industry and Chemical Engineering, Dalian Polytechnic University, Dalian 116034, China

<sup>b</sup> Dalian Institute of Chemical Physics, Chinese Academy of Sciences, Dalian 116023, China

\*Corresponding authors

E-mail: houcj@dlpu.edu.cn (C.-J. Hou); xiangping@dicp.ac.cn (X.-P. Hu)

### Supporting Information

|                                                                                |    |
|--------------------------------------------------------------------------------|----|
| General Information.....                                                       | 2  |
| Preparation of P,N <sub>sp3</sub> Ligands .....                                | 3  |
| General Procedure for Pd-Catalyzed Asymmetric Allylic Alkylation.....          | 7  |
| General Procedure for Pd-Catalyzed Asymmetric Allylic Amination .....          | 15 |
| General Procedure for Pd-Catalyzed Asymmetric Allylic Etherification.....      | 28 |
| Synthetic Application of Asymmetric Allylic Amination Product 8a .....         | 38 |
| References.....                                                                | 39 |
| Copies of <sup>1</sup> H, <sup>13</sup> C and <sup>31</sup> P NMR Spectra..... | 41 |

## General Information

All reactions were carried out under a nitrogen atmosphere. Solvents were purified by standard procedure before use. Commercial reagents were used without further purification. Flash chromatography was performed on silica gel 60 (40-63 $\mu$ m, 60 $\text{\AA}$ ). Thin layer chromatography (TLC) was performed on glass plates coated with silica gel 60 with F254 indicator. Proton nuclear magnetic resonance ( $^1\text{H}$  NMR) spectra were recorded on a Bruker 400 MHz spectrometer. Chemical shifts for protons are reported in parts per million downfield from tetramethylsilane and are referenced to residual proton in the deuterated NMR solvent ( $\text{CDCl}_3 = \delta$  7.26 or  $\text{DMSO} = \delta$  2.50). Carbon nuclear magnetic resonance ( $^{13}\text{C}$  NMR) spectra were recorded on a Bruker 100 MHz spectrometer. Chemical shifts for carbon are reported in parts per million downfield from tetramethylsilane and are referenced to the carbon resonances of the solvent ( $\text{CDCl}_3 = \delta$  77.02). Data are represented as follows: chemical shift, multiplicity (br = broad, s = singlet, d = doublet, t = triplet, q = quartet, m = multiplet), coupling constants in Hertz (Hz), integration. Only the most important and relevant frequencies are reported. Enantiomeric ratios were determined by chiral HPLC with *n*-hexane and *i*-PrOH as solvents.

## Preparation of P,N<sub>sp3</sub> Ligands

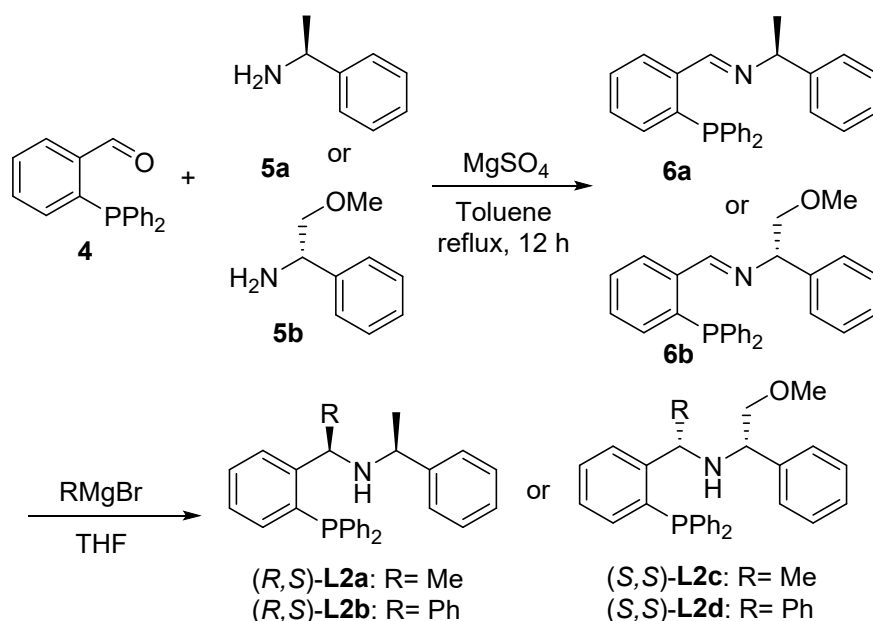

To an oven-dried reaction flask equipped with a magnetic stir bar was charged with 2-(Diphenylphosphino)benzaldehyde **4** (1.45 g, 5.0 mmol), (*S*)-phenylethylamine derivatives **5** (5.0 mol), anhydrous MgSO<sub>4</sub> (1.0 g) and anhydrous toluene (10 mL) under nitrogen atmosphere. The mixture was heated and refluxed for 12 h. After cooling to room temperature, MgSO<sub>4</sub> was filtered out. The solvent was removed under reduced pressure to give the Schiff base product **6**, which was dissolved in anhydrous THF (20 mL). Grignard reagent was added dropwise to the solution at 0 °C. The mixture was stirred for 5 hours. The unreacted Grignard reagent was quenched by the saturated NaCl aqueous solution. The aqueous phase was extracted with Et<sub>2</sub>O and the combined organic layers were dried over MgSO<sub>4</sub>. The solvent was removed under reduced pressure and the residue was purified by flash chromatography to give the desired ligands **L2a-d**.

(*S*)-**6a** was obtained in 90% yield as viscous liquid after purification with column

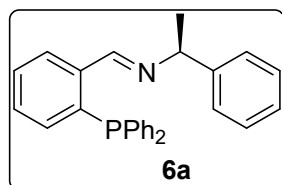

chromatography on silica gel (hexane/ethyl acetate/triethylamine, 100/10/5): <sup>1</sup>H NMR (400 MHz, CDCl<sub>3</sub>) δ 8.93 (d, *J* = 4.8 Hz, 1H), 8.05-7.95 (m, 1H), 7.38-7.18 (m,

17H), 6.93-6.77 (m, 1H), 4.40 (q,  $J = 6.6$  Hz, 1H), 1.34 (d,  $J = 6.7$  Hz, 3H).  $^{13}\text{C}$  NMR (100 MHz,  $\text{CDCl}_3$ )  $\delta$  158.2 (d,  $J = 20.3$  Hz), 141.8, 139.7, 139.5, 137.6, 137.4, 136.8, 136.7, 136.6, 136.5, 134.3, 134.2, 134.1, 134.0, 133.2, 130.2, 128.9, 128.8, 128.7, 128.5, 128.5, 128.4, 128.2, 128.1, 126.7, 69.8, 24.5.  $^{31}\text{P}$  NMR (162 MHz,  $\text{CDCl}_3$ ):  $\delta$  -13.08. HRMS  $[\text{M}+\text{H}]^+$  calcd. for  $\text{C}_{27}\text{H}_{25}\text{NP}^+$ : 394.1719, found: 394.1724.

(*S*)-**6b** was obtained in 85% yield as viscous liquid after purification with column

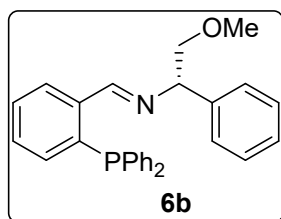

chromatography on silica gel (hexane/ethyl acetate/triethylamine, 100/50/3):  $^1\text{H}$  NMR (400 MHz,  $\text{CDCl}_3$ )  $\delta$  8.84 (d,  $J = 4.5$  Hz, 1H), 8.00-7.89 (m, 1H), 7.34-7.12 (m, 17H), 6.85-6.72 (m, 1H), 4.38 (dd,  $J = 7.8, 4.7$  Hz, 1H), 3.46

(dd,  $J = 9.7, 4.6$  Hz, 1H), 3.37 (t,  $J = 9.0$  Hz, 1H), 3.08 (s, 3H).  $^{13}\text{C}$  NMR (100 MHz,  $\text{DMSO}-d_6$ )  $\delta$  159.9 (d,  $J = 15.9$  Hz), 141.2, 139.3, 139.2, 137.6, 137.4, 137.3, 137.2, 134.2, 134.0, 133.9, 133.7, 133.6, 130.9, 129.4, 129.3, 129.2, 129.1, 128.6, 127.8, 127.5, 77.0, 74.0, 58.4.  $^{31}\text{P}$  NMR (162 MHz,  $\text{CDCl}_3$ ):  $\delta$  -12.73. HRMS  $[\text{M}+\text{H}]^+$  calcd. for  $\text{C}_{28}\text{H}_{27}\text{NOP}^+$ : 424.1825, found: 424.1824.

(*R,S*)-**L2a** was obtained in 75% yield as viscous liquid after purification with column

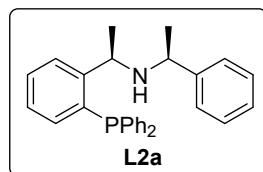

chromatography on silica gel (hexane/ethyl acetate, 10/1):  $^1\text{H}$  NMR (400 MHz,  $\text{CDCl}_3$ )  $\delta$  7.62 (dd,  $J = 7.6, 4.4$  Hz, 1H), 7.36 (t,  $J = 7.5$  Hz, 1H), 7.32-7.28 (m, 3H), 7.27-7.21 (m, 4H), 7.21-

7.12 (m, 7H), 7.11-7.08 (m, 2H), 6.94 (dd,  $J = 7.6, 4.2$  Hz, 1H), 4.53 (p,  $J = 6.7$  Hz, 1H), 3.48 (q,  $J = 6.6$  Hz, 1H), 1.16 (d,  $J = 6.7$  Hz, 3H), 1.12 (d,  $J = 6.6$  Hz, 3H).  $^{13}\text{C}$  NMR (100 MHz,  $\text{CDCl}_3$ )  $\delta$  151.3, 151.1, 146.2, 137.7, 137.6, 137.4, 137.3, 135.0, 134.9, 134.5, 134.0, 133.9, 133.8, 133.7, 129.6, 128.6, 128.5, 128.4, 126.9, 126.7, 126.6, 126.5, 126.4, 55.8, 53.25 (d,  $J = 24.4$  Hz), 24.8 (d,  $J = 1.8$  Hz), 24.7.  $^{31}\text{P}$  NMR (162 MHz,  $\text{CDCl}_3$ ):  $\delta$  -19.19. HRMS  $[\text{M}+\text{H}]^+$  calcd. for  $\text{C}_{28}\text{H}_{29}\text{NP}^+$ : 410.2032, found: 410.2034.

(*R,S*)-**L2b** was obtained in 70% yield as viscous liquid after purification with column

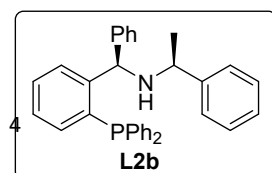

chromatography on silica gel (hexane/ethyl acetate, 10/1):  $^1\text{H}$  NMR (400 MHz,  $\text{CDCl}_3$ )  $\delta$  7.68 (dd,  $J = 7.7, 4.4$  Hz, 1H), 7.37

(t,  $J = 7.5$  Hz, 1H), 7.33-7.28 (m, 3H), 7.27-7.18 (m, 6H), 7.18-7.10 (m, 8H), 7.10-7.02 (m, 3H), 7.026.93 (m, 3H), 5.70 (d,  $J = 7.3$  Hz, 1H), 3.64 (q,  $J = 6.6$  Hz, 1H), 1.22 (d,  $J = 6.6$  Hz, 3H).  $^{13}\text{C}$  NMR (100 MHz,  $\text{CDCl}_3$ )  $\delta$  145.9, 143.6, 137.6, 137.0, 135.7, 135.1, 133.8, 133.7, 133.6, 133.5, 129.3, 128.5, 128.4, 128.3, 128.2, 128.1, 128.0, 127.1, 126.7, 126.6, 126.5, 61.4 (d,  $J = 23.1$  Hz), 55.5, 23.4.  $^{31}\text{P}$  NMR (162 MHz,  $\text{CDCl}_3$ ):  $\delta$  -18.79. HRMS  $[\text{M}+\text{H}]^+$  calcd. for  $\text{C}_{33}\text{H}_{31}\text{NP}^+$ : 472.2189, found: 472.2187.

(*S,S*)-**L2c** was obtained in 68% yield as viscous liquid (converted into white solid at low temperature) after purification with column chromatography on silica gel

(hexane/ethyl acetate, 10/1):  $^1\text{H}$  NMR (400 MHz,  $\text{CDCl}_3$ )  $\delta$  7.59-7.53 (m, 1H), 7.34-7.23 (m, 8H), 7.19-7.13 (m, 8H), 7.06-7.01 (m, 1H), 6.82-6.76 (m, 1H), 4.78-4.65 (m, 1H), 3.86 (dd,  $J = 6.6, 4.9$  Hz, 1H), 3.45-3.36 (m, 2H), 3.28 (s, 3H), 1.16 (d,  $J = 6.5$  Hz, 3H).  $^{13}\text{C}$  NMR (100 MHz,  $\text{CDCl}_3$ )  $\delta$  151.0, 150.7, 141.6, 141.6, 137.6, 137.5, 137.2, 137.1, 134.6, 134.5, 134.3, 134.1, 133.9, 133.7, 133.5, 129.3, 128.7, 128.6, 128.5, 128.4, 128.1, 127.8, 127.0, 126.8, 126.6, 126.5, 76.6, 60.2, 59.0, 52.7 (d,  $J = 26.0$  Hz), 23.5.  $^{31}\text{P}$  NMR (162 MHz,  $\text{CDCl}_3$ ):  $\delta$  -17.48. HRMS  $[\text{M}+\text{Na}]^+$  calcd. for  $\text{C}_{29}\text{H}_{31}\text{NOP}^+$ : 440.2138, found: 440.2135.

(*S,S*)-**L2d** was obtained in 65% yield as white solid after purification with column chromatography on silica gel (hexane/ethyl acetate, 10/1).

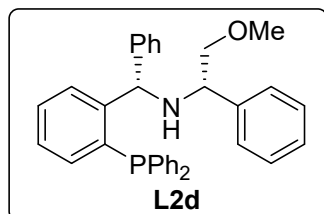

chromatography on silica gel (hexane/ethyl acetate, 10/1).

Mp: 63-65 °C.  $^1\text{H}$  NMR (400 MHz,  $\text{CDCl}_3$ )  $\delta$  7.54 (dd,  $J = 7.6, 4.4$  Hz, 1H), 7.26-7.22 (m, 3H), 7.19-7.10 (m, 8H), 7.10-7.04 (m, 7H), 7.03-6.90 (m, 4H), 6.78 (dd,  $J = 7.5, 3.9$

Hz, 1H), 5.63 (d,  $J = 7.6$  Hz, 1H), 5.19 (s, 1H), 3.76 (t,  $J = 6.0$  Hz, 1H), 3.36 (d,  $J = 6.1$  Hz, 2H), 3.17 (s, 3H).  $^{13}\text{C}$  NMR (100 MHz,  $\text{CDCl}_3$ )  $\delta$  149.2, 149.0, 143.0, 140.7, 137.7, 137.6, 137.3, 137.2, 135.1, 135.0, 134.4, 134.1, 133.9, 133.8, 133.6, 123.3, 133.8, 133.7, 133.5, 129.4, 128.5, 128.4, 128.3, 128.2, 128.1, 128.0, 127.9, 127.9, 127.2, 127.0, 126.6, 77.0, 60.6 (d,  $J = 24.4$  Hz), 59.7, 58.9.  $^{31}\text{P}$  NMR (162 MHz,  $\text{CDCl}_3$ ):  $\delta$  -17.33. HRMS  $[\text{M}+\text{H}]^+$  calcd. for  $\text{C}_{34}\text{H}_{33}\text{NOP}^+$ : 502.2294, found: 502.2277.

## General Procedure for Pd-Catalyzed Asymmetric Allylic Alkylation

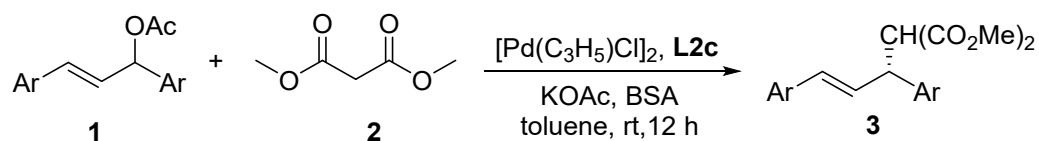

A solution of ligand (*S,S*)-**L2c** (2 mol%) and  $[\text{Pd}(\text{C}_3\text{H}_5\text{Cl})_2]$  (5 mol%) were dissolved in toluene (1.0 mL) in a Schlenk tube under an  $\text{N}_2$  atmosphere. After 1 h of stirring at room temperature, allylic acetate **1** (0.5 mmol), *N,O*-bis(trimethylsilyl)-acetamide (1.5 mmol), KOAc (catalytic amount) and toluene (2 mL) were added. The mixture was stirred at room temperature for 12 h. The solvent was removed under reduced pressure and the residue was purified by flash chromatography.

**Dimethyl 2-((*R,E*)-1,3-diphenylallyl)malonate (**3a**).**<sup>[1]</sup> Colorless oil was obtained in

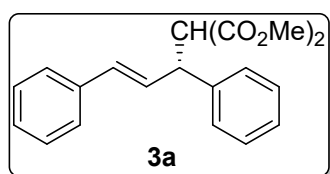

98% yield. 93% ee was determined by chiral HPLC (Chiralpak AD-H, *n*-hexane/*i*-PrOH = 90/10, 0.8 mL/min, 254 nm, 40 °C):  $t_R$  (major) = 12.1 min,  $t_R$  (minor) = 15.6 min.  $^1\text{H}$  NMR (400 MHz,  $\text{CDCl}_3$ )  $\delta$  7.33-7.28 (m, 6H), 7.28-7.24 (m, 2H), 7.23-7.16 (m, 2H), 6.48 (d,  $J = 15.8$  Hz, 1H), 6.33 (dd,  $J = 15.8, 8.7$  Hz, 1H), 4.27 (dd,  $J = 10.9, 8.7$  Hz, 1H), 3.96 (d,  $J = 10.9$  Hz, 1H), 3.69 (s, 3H), 3.51 (s, 3H).

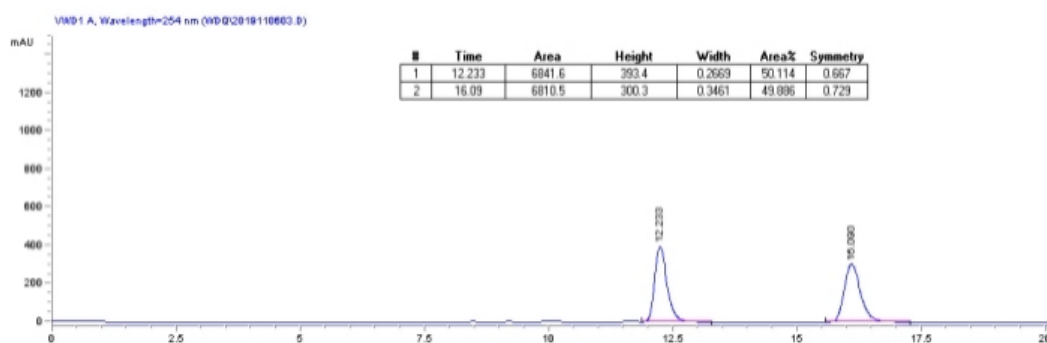

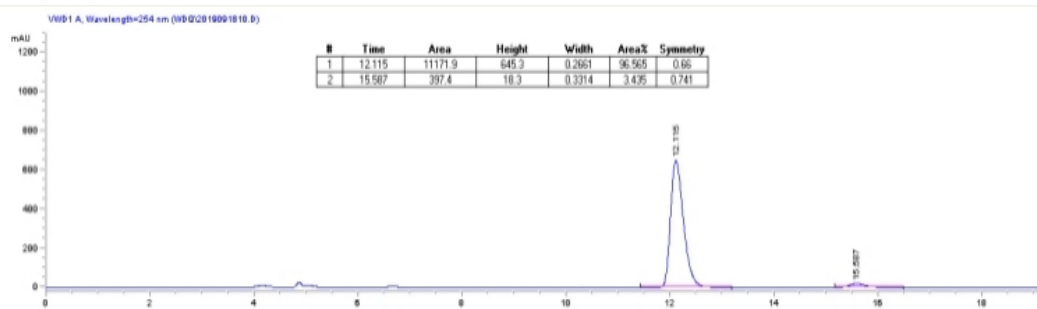

**Dimethyl 2-((*R,E*)-1,3-di-*o*-tolylallyl)malonate (3b).**<sup>[2]</sup> Colorless oil was obtained in

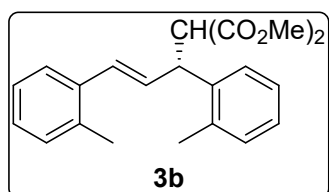

96% yield. 81% ee was determined by chiral HPLC (Chiralcel OD-H *n*-hexane/*i*-PrOH = 95/5, 0.8 mL/min, 254 nm, 40 °C) :  $t_R$ (major) = 6.9 min,  $t_R$ (minor) = 8.6 min.

<sup>1</sup>H NMR (CDCl<sub>3</sub>) δ 7.32-7.27 (m, 1H), 7.25-7.21 (m, 1H), 7.20-7.14 (m, 2H), 7.14-7.06 (m, 4H), 6.65 (d,  $J$  = 15.5 Hz, 1H), 6.01 (dd,  $J$  = 15.5, 8.7 Hz, 1H), 4.56 (dd,  $J$  = 11.3, 8.7 Hz, 1H), 4.06 (d,  $J$  = 11.3 Hz, 1H), 3.73 (s, 3H), 3.51 (s, 3H), 2.47 (s, 3H), 2.27 (s, 3H).

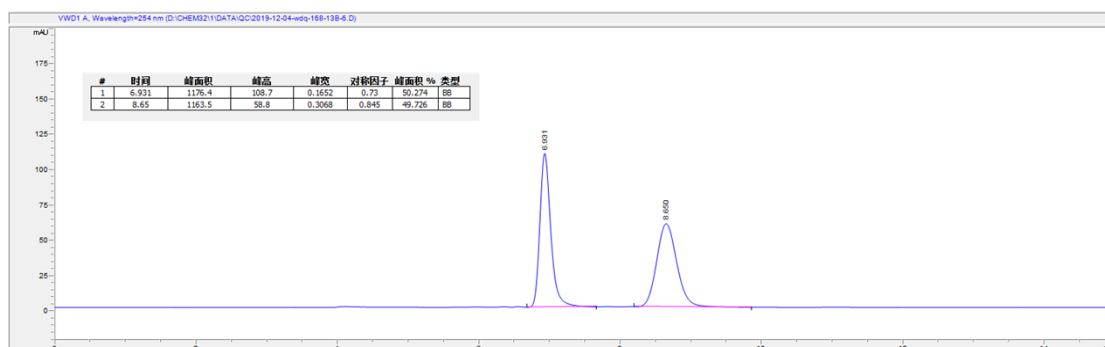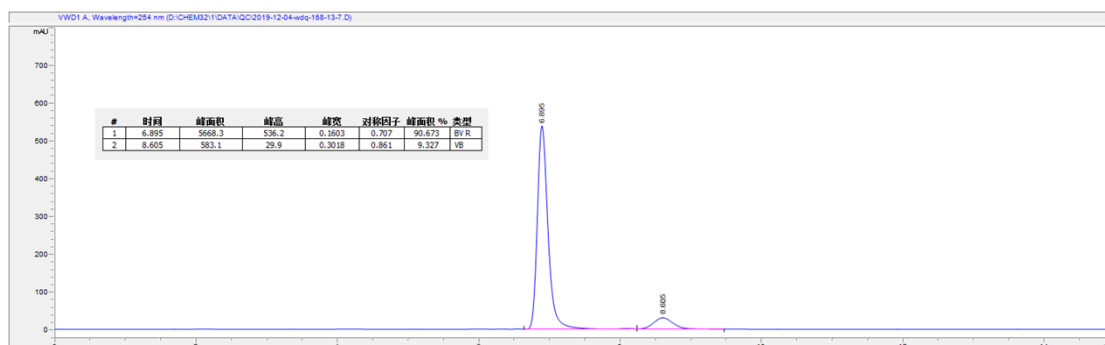

**Dimethyl 2-((*R,E*)-1,3-bis(3-bromophenyl)allyl)malonate (3c).**<sup>[3]</sup> Colorless oil was

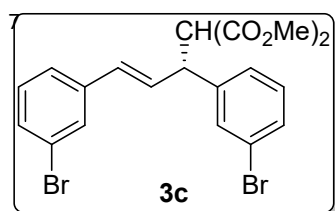

obtained in 94% yield. 84% ee was determined by chiral HPLC (Chiralcel AD-H, *n*-hexane/*i*-PrOH = 85/15, 0.8 mL/min, 254 nm, 40 °C):  $t_R$  (major) = 9.6 min,  $t_R$  (minor) = 12.4 min.  $^1\text{H}$  NMR (400 MHz,  $\text{CDCl}_3$ )  $\delta$  7.45 (d,  $J = 12.7$  Hz, 2H), 7.40-7.32 (m, 2H), 7.28-7.18 (m, 3H), 7.18-7.12 (m, 1H), 6.41 (d,  $J = 15.8$  Hz, 1H), 6.29 (dd,  $J = 15.8, 8.4$  Hz, 1H), 4.23 (t,  $J = 9.6$  Hz, 2H), 3.91 (d,  $J = 10.8$  Hz, 1H), 3.71 (s, 3H), 3.57 (s, 3H).

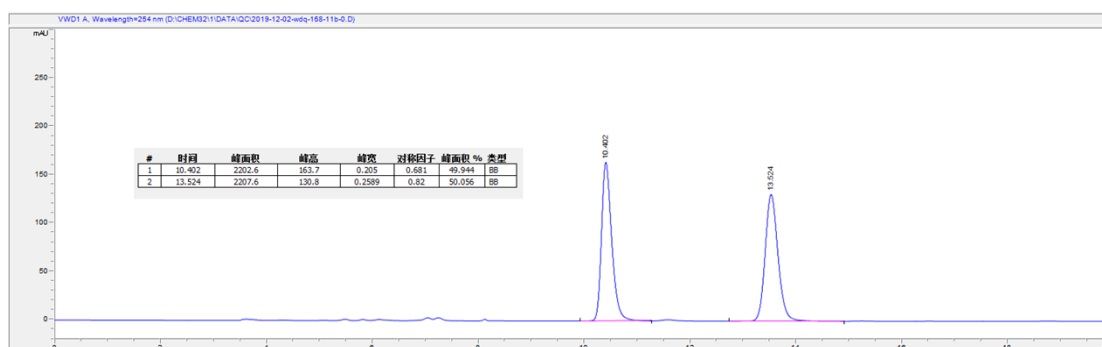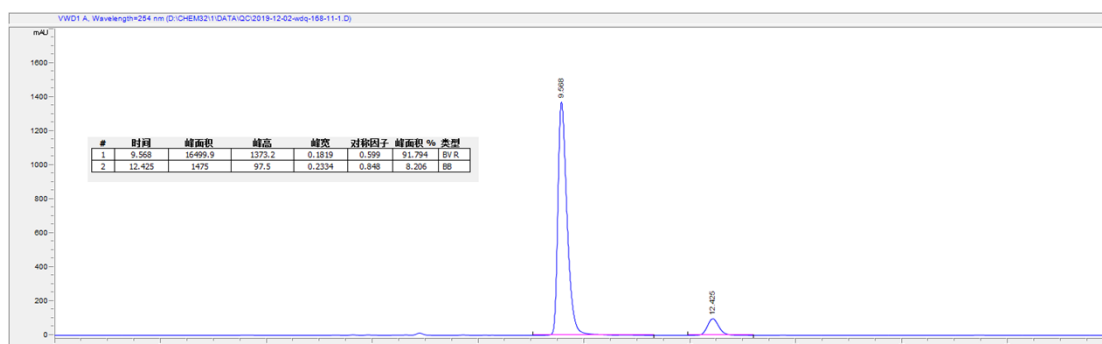

**Dimethyl 2-((*R,E*)-1,3-dip-tolylallyl)malonate (3d).**<sup>[1]</sup> Colorless oil was obtained in

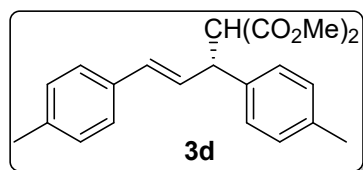

96% yield. 89% ee was determined by chiral HPLC (Chiralpak AD-H, *n*-hexane/*i*-PrOH = 85/15, 0.8 mL/min, 254 nm, 40 °C):  $t_R$  (major) = 12.2 min,  $t_R$  (minor) = 16.1 min.  $^1\text{H}$  NMR (400 MHz,  $\text{CDCl}_3$ )  $\delta$  7.15-7.07 (m, 4H), 7.03 (d,  $J = 7.8$  Hz, 2H), 6.99 (d,  $J = 7.8$  Hz, 2H), 6.35 (d,  $J = 15.7$  Hz, 1H), 6.18 (dd,  $J = 15.7, 8.6$  Hz, 1H), 4.14 (dd,  $J = 10.9, 8.6$  Hz, 1H), 3.85 (d,  $J = 10.9$  Hz, 1H), 3.61 (s, 3H), 3.45 (s, 3H), 2.23 (s, 6H).



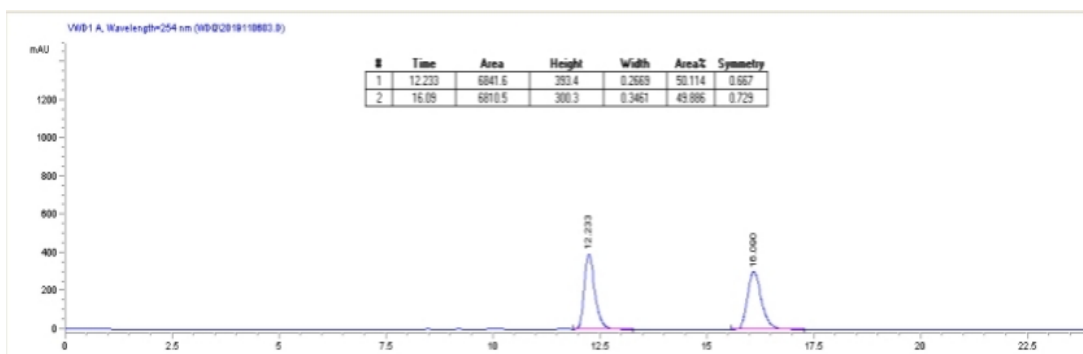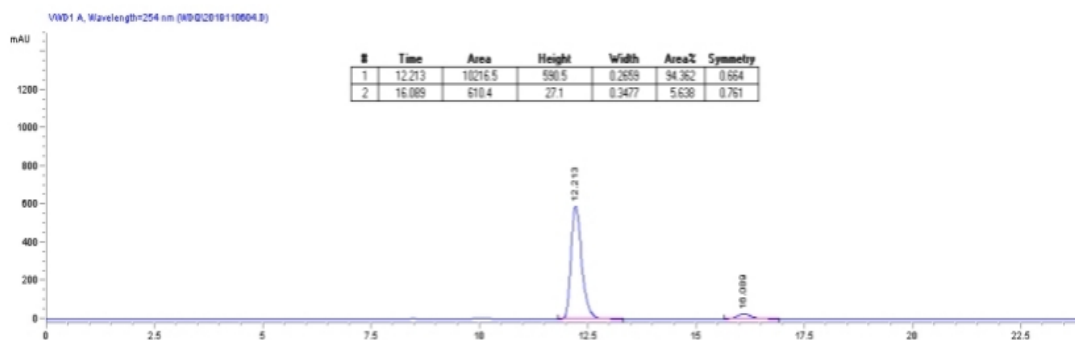

**Dimethyl 2-((*R,E*)-1,3-bis(4-methoxyphenyl)allyl)malonate (**3e**).**<sup>[1]</sup> Colorless oil was

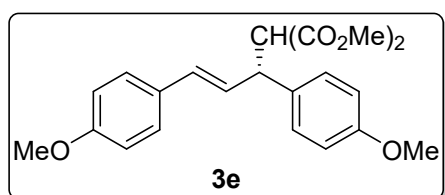

obtained in 88% yield. 91% ee was determined by chiral HPLC (Chiralpak AD-H, *n*-hexane/*i*-PrOH = 80/20, 0.8 mL/min, 254 nm, 40 °C):  $t_R$  (major) = 15.9 min,  $t_R$  (minor) = 24.0 min. <sup>1</sup>H NMR (400 MHz, CDCl<sub>3</sub>)  $\delta$  7.24 (d,  $J$  = 8.7 Hz, 2H), 7.20 (d,  $J$  = 8.7 Hz, 2H), 6.84 (d,  $J$  = 8.7 Hz, 2H), 6.80 (d,  $J$  = 8.7 Hz, 2H), 6.39 (d,  $J$  = 15.7 Hz, 1H), 6.16 (dd,  $J$  = 15.7, 8.5 Hz, 1H), 4.19 (dd,  $J$  = 10.9, 8.5 Hz, 1H), 3.89 (d,  $J$  = 10.9 Hz, 1H), 3.78 (s, 3H), 3.77 (s, 3H), 3.69 (s, 3H), 3.52 (s, 3H).

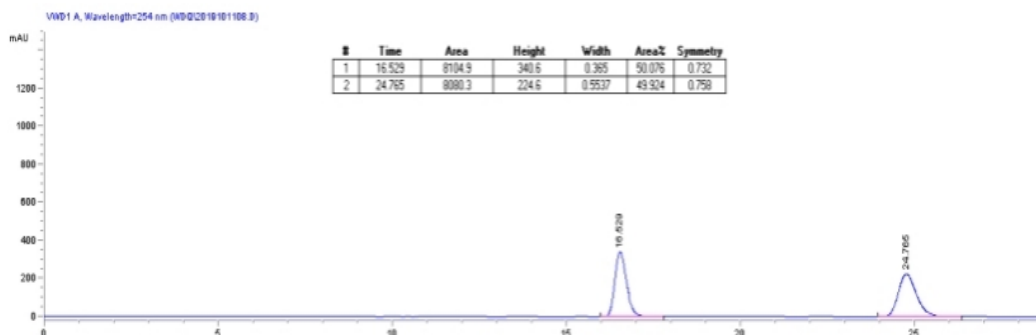

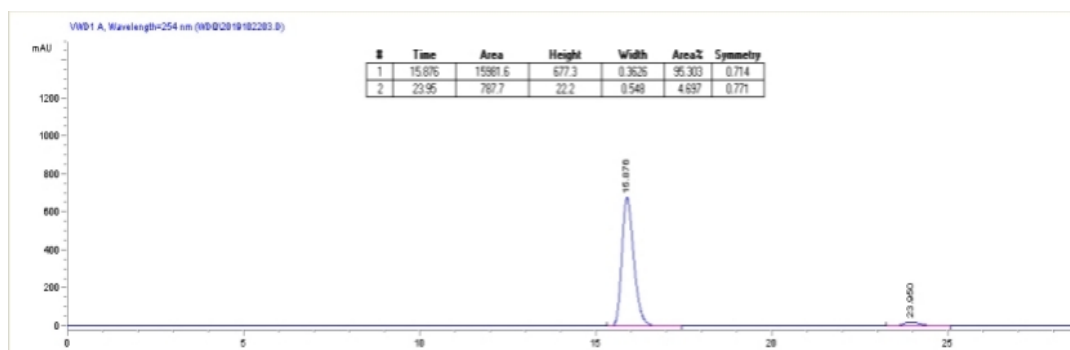

**Dimethyl 2-((*R,E*)-1,3-bis(4-bromophenyl)allyl)malonate (3f).**<sup>[1]</sup> Colorless oil was

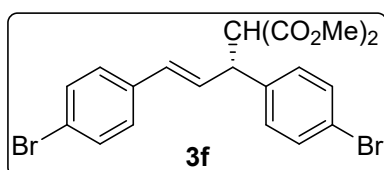

obtained in 81% yield. 85% ee was determined by chiral HPLC (Chiralcel AD-H, *n*-hexane/*i*-PrOH = 85/15, 0.8 mL/min, 254 nm, 40 °C):  $t_R$  (major) = 17.8 min,  $t_R$  (minor) = 25.4 min. <sup>1</sup>H NMR (400 MHz, CDCl<sub>3</sub>)  $\delta$  7.37 (d,  $J$  = 8.7 Hz, 2H), 7.32 (d,  $J$  = 8.7 Hz, 2H), 7.09 (d,  $J$  = 8.1 Hz, 4H), 6.31 (d,  $J$  = 15.7 Hz, 1H), 6.20 (dd,  $J$  = 15.7, 8.3 Hz, 1H), 4.15 (dd,  $J$  = 10.8, 8.3 Hz, 1H), 3.82 (d,  $J$  = 10.8 Hz, 1H), 3.62 (s, 3H), 3.47 (s, 3H).

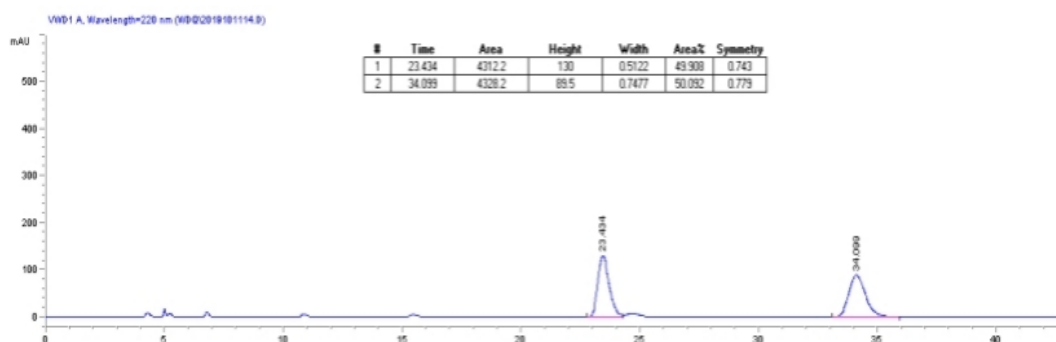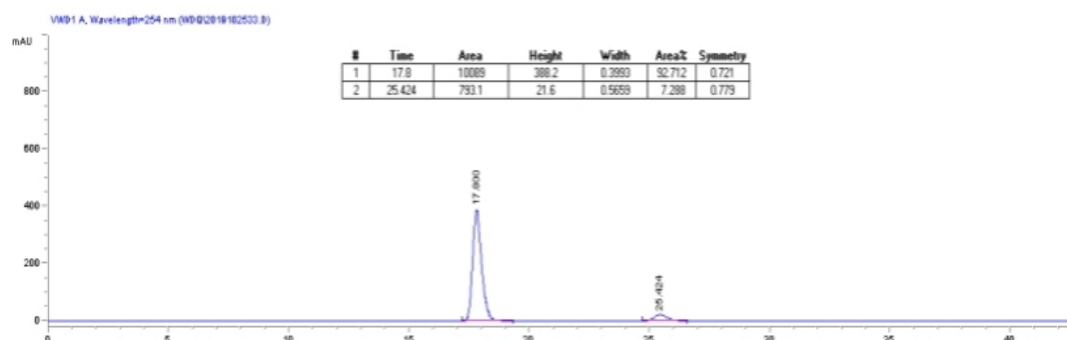

**Dimethyl 2-((*R,E*)-1,3-bis(4-chlorophenyl)allyl)malonate (3g).**<sup>[1]</sup> Colorless oil was

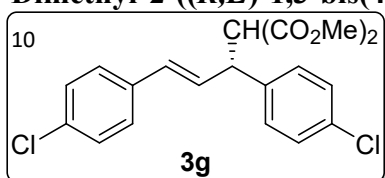

obtained in 92% yield. 84% ee was determined by chiral HPLC (*n*-hexane/*i*-PrOH = 90/10, 0.8 mL/min, 254 nm, 40 °C):  $t_R$  (major) = 18.9 min,  $t_R$  (minor) = 27.9 min.  $^1\text{H NMR}$  (400 MHz,  $\text{CDCl}_3$ )  $\delta$  7.32-7.27 (m, 2H), 7.26-7.19 (m, 6H), 6.40 (d,  $J = 15.7$  Hz, 1H), 6.27 (dd,  $J = 15.7, 8.4$  Hz, 1H), 4.24 (dd,  $J = 10.7, 8.4$  Hz, 1H), 3.90 (d,  $J = 10.7$  Hz, 1H), 3.70 (s, 3H), 3.55 (s, 3H).

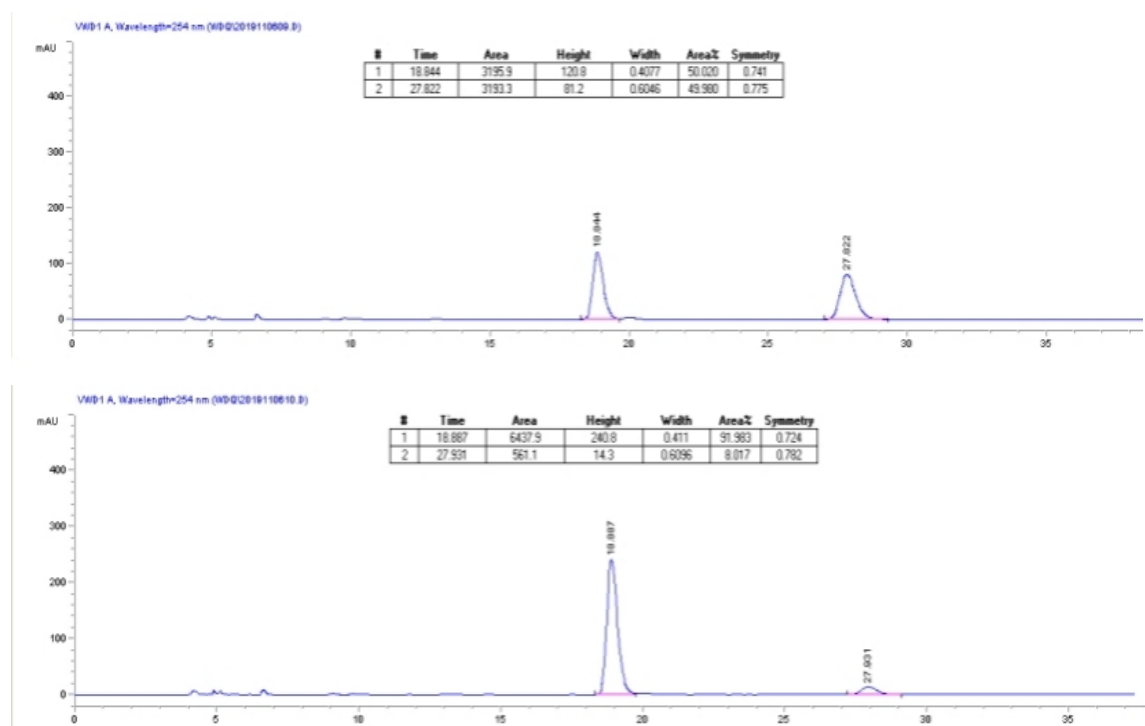

**Dimethyl 2-((*R,E*)-1,3-bis(4-fluorophenyl)allyl)malonate (**3h**).**<sup>[1]</sup> Colorless oil was

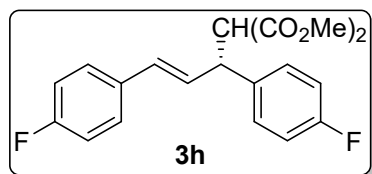

obtained in 98% yield. 90% ee was determined by chiral HPLC (*n*-hexane/*i*-PrOH = 85/15, 0.8 mL/min, 254 nm, 40 °C):  $t_R$  (major) = 11.2 min,  $t_R$  (minor) = 16.1 min.  $^1\text{H NMR}$  (400 MHz,  $\text{CDCl}_3$ )  $\delta$  7.30-7.23 (m, 4H), 7.05-6.92 (m, 4H), 6.42 (d,  $J = 15.7$  Hz, 1H), 6.22 (dd,  $J = 15.7, 8.5$  Hz, 1H), 4.25 (dd,  $J = 10.8, 8.5$  Hz, 1H), 3.89 (d,  $J = 10.8$  Hz, 1H), 3.71 (s, 3H), 3.53 (s, 3H).

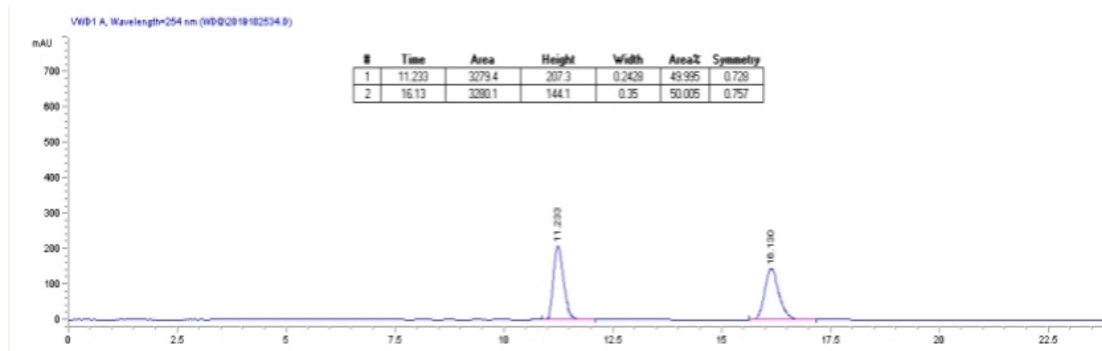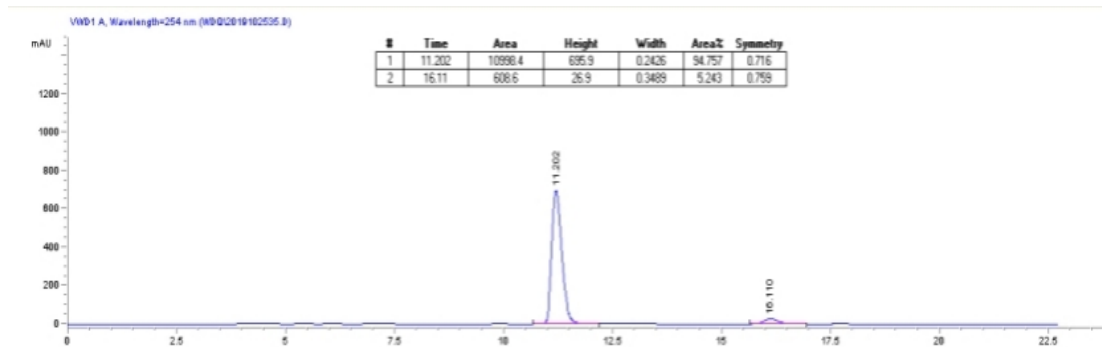

**Dimethyl 2-((*R,E*)-1,3-di(naphthalen-2-yl)allyl)malonate (**3i**).**<sup>[4]</sup> Colorless oil was

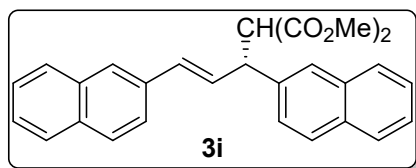

obtained in 76% yield. 85% ee was determined by chiral HPLC (Chiralpak AD-H, *n*-hexane/*i*-PrOH = 90/10, 0.8 mL/min, 254 nm, 40 °C);  $t_R$ (major)=25.9

min,  $t_R$ (minor) = 33.2 min. <sup>1</sup>H NMR (400 MHz, CDCl<sub>3</sub>) δ 7.76-7.71 (m, 3H), 7.71-7.68 (m, 2H), 7.67-7.62 (m, 2H), 7.59 (s, 1H), 7.46 (d,  $J$  = 8.6 Hz, 1H), 7.41-7.36 (m, 3H), 7.36-7.29 (m, 2H), 6.60 (d,  $J$  = 15.7 Hz, 1H), 6.46 (dd,  $J$  = 15.7, 8.4 Hz, 1H), 4.43 (dd,  $J$  = 10.9, 8.4 Hz, 1H), 4.05 (d,  $J$  = 10.9 Hz, 1H), 3.65 (s, 3H), 3.41 (s, 3H).

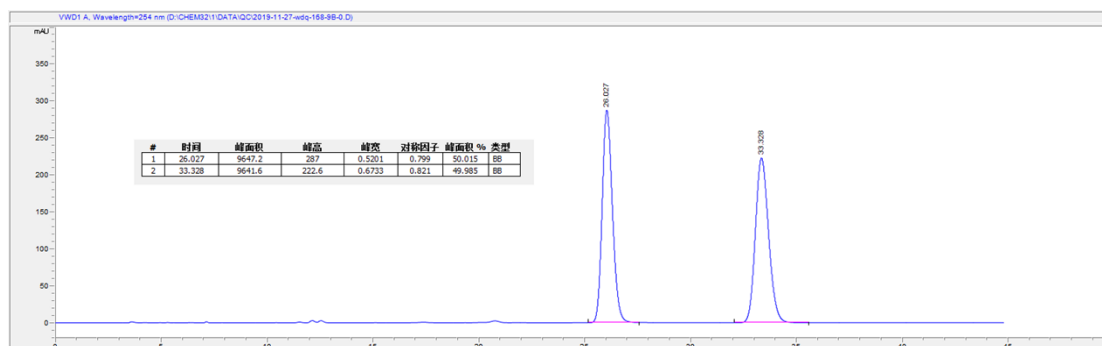

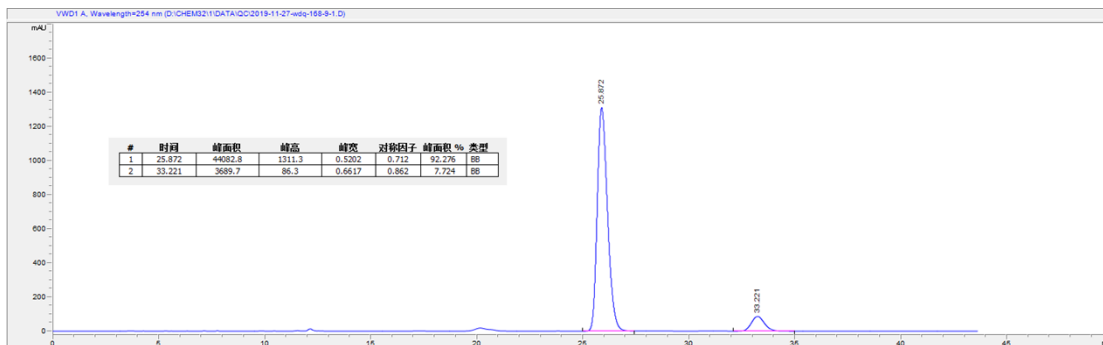

**Dimethyl 2-((*R,E*)-1,3-di(thiophen-2-yl)allyl)malonate (3j).** Colorless oil was

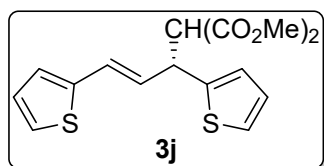

obtained in 90% yield. 72% ee was determined by chiral HPLC (Chiralpak AD-H, *n*-hexane/*i*-PrOH = 85/15, 0.8 mL/min, 254 nm, 40 °C):  $t_R$  (major) = 8.7 min,  $t_R$  (minor) =

11.2 min.  $^1\text{H}$  NMR (400 MHz,  $\text{CDCl}_3$ )  $\delta$  7.19 (d,  $J = 4.9$  Hz, 1H), 7.15-7.11 (m, 1H), 6.98-6.87 (m, 4H), 6.63 (d,  $J = 15.5$  Hz, 1H), 6.17 (dd,  $J = 15.5, 8.8$  Hz, 1H), 4.53 (t,  $J = 9.4$  Hz, 1H), 3.89 (d,  $J = 10.1$  Hz, 1H), 3.71 (s, 3H), 3.62 (s, 3H).  $^{13}\text{C}$  NMR (100 MHz,  $\text{CDCl}_3$ )  $\delta$  167.7, 167.6, 143.2, 141.5, 127.8, 127.4, 126.9, 126.1, 125.5, 124.9, 124.6, 124.5, 58.5, 52.8, 52.7, 44.1. HRMS  $[\text{M}+\text{Na}]^+$  calcd. for  $\text{C}_{16}\text{H}_{16}\text{NaO}_4\text{S}_2^+$ : 359.0382, found: 359.0378.

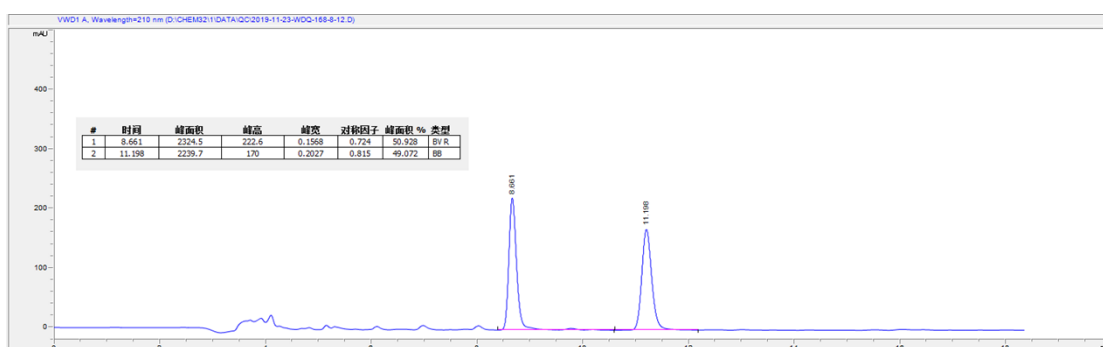

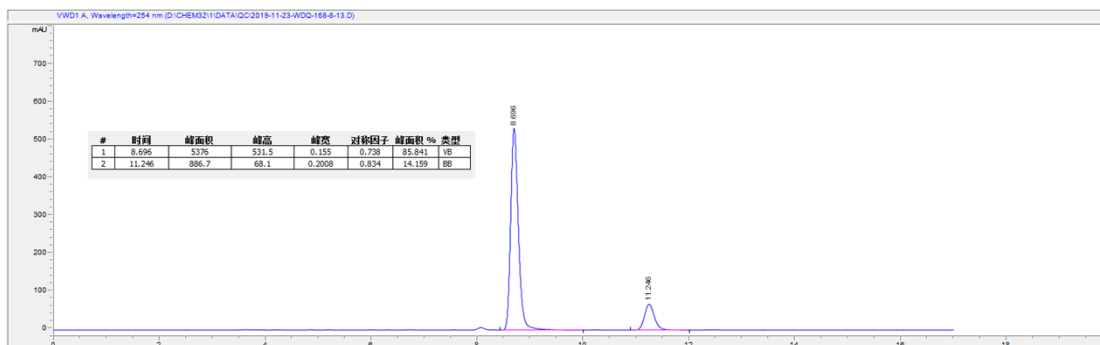

## General Procedure for Pd-Catalyzed Asymmetric Allylic Amination

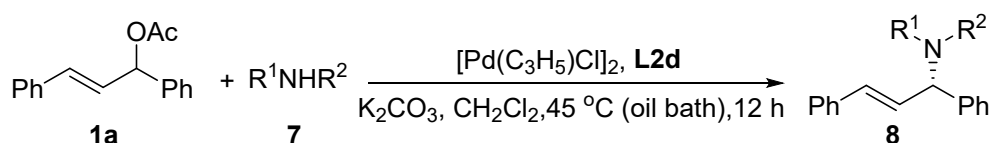

Ligand (*S,S*)-**L2d** (0.012 mmol) and  $[\text{Pd}(\text{C}_3\text{H}_5)\text{Cl}]_2$  (0.006 mmol) was dissolved in  $\text{CH}_2\text{Cl}_2$  (1.0 mL) in a Schlenk tube under an  $\text{N}_2$  atmosphere. After 1 h of stirring at room temperature, 1,3-phenyl-2-propenyl acetate **1a** (0.2 mmol), amines **7** (0.6 mmol),  $\text{K}_2\text{CO}_3$  (1.0 mmol) and  $\text{CH}_2\text{Cl}_2$  (2.0 mL) was added. The mixture was heated to  $45^\circ\text{C}$  (oil bath) for 12 or 24 h. After cooling to room temperature, the solvent was removed under reduced pressure and the residue was purified by flash column chromatography, eluting with petroleum ether and ethyl acetate to afford the desired product **8**.

**(S, E)-N-benzyl-1,3-diphenylprop-2-en-1-amine (8a)**.<sup>[1]</sup> Colorless oil was obtained in 92% yield. 88% ee was determined by chiral HPLC (Chiralpak OJ-H, *n*-hexane/*i*-PrOH = 85/15, 0.5 mL/min, 254 nm,  $25^\circ\text{C}$ ):  $t_R$  (major) = 13.1 min,  $t_R$  (minor) = 15.1 min.  $^1\text{H NMR}$  (400 MHz,  $\text{CDCl}_3$ )  $\delta$  7.48-7.41 (m, 2H), 7.38-7.33 (m, 6H), 7.30-7.25 (m, 7H), 6.59 (d,  $J = 15.9$  Hz, 1H), 6.35 (dd,  $J = 15.9, 7.5$  Hz, 1H), 4.42 (d,  $J = 7.5$  Hz, 1H), 3.80 (s, 2H).

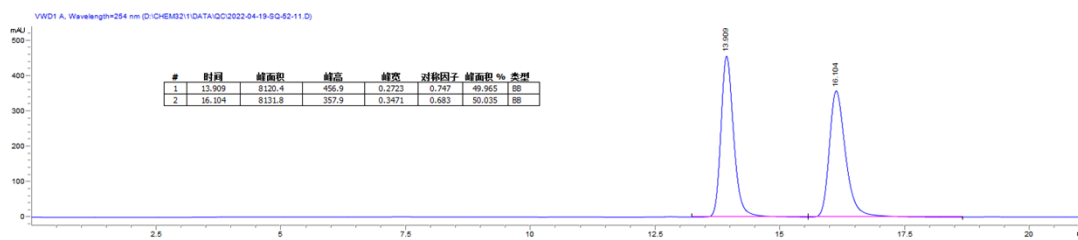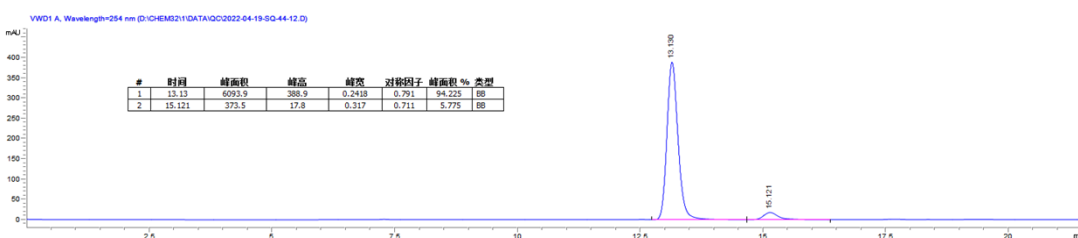

**(*S,E*)-4-(1,3-Diphenylallyl)morpholine (8b).**<sup>[1]</sup> Colorless oil was obtained in 93% yield. 91% ee was determined by chiral HPLC (Chiralpak OD-H, *n*-hexane/*i*-PrOH = 90/10, 1 mL/min, 254 nm, 25 °C):  $t_R$  (major) = 6.3 min,  $t_R$  (minor) = 12.3 min. <sup>1</sup>H NMR (400 MHz, CDCl<sub>3</sub>)  $\delta$  7.46-7.41 (m, 2H), 7.40-7.33 (m, 4H), 7.33-7.27 (m, 3H), 7.25-7.21 (m, 1H), 6.60 (d,  $J$  = 15.8 Hz, 1H), 6.31 (dd,  $J$  = 15.8, 8.9 Hz, 1H), 3.82 (d,  $J$  = 8.9 Hz, 1H), 3.78-3.64 (m, 4H), 2.65-2.51 (m, 2H), 2.48-2.36 (m, 2H).

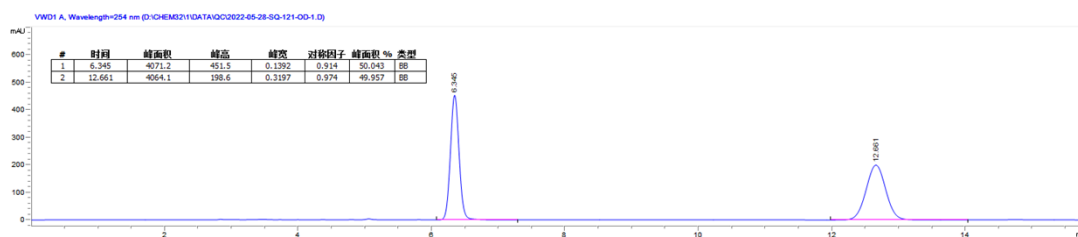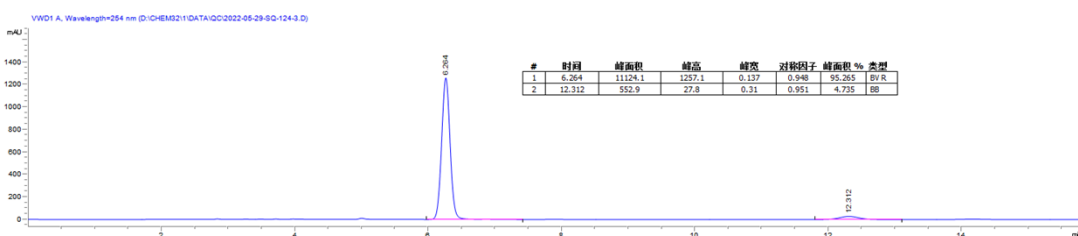

**(*S,E*)-1-(1,3-Diphenylallyl)Piperidine (8c).**<sup>[5]</sup> Colorless oil was obtained in 96% yield.

95% ee was determined by chiral HPLC (Chiralpak OJ-H, *n*-hexane/*i*-PrOH = 97/3, 0.8 mL/min, 254 nm, 25 °C):  $t_R$  (major) = 6.1 min,  $t_R$  (minor) = 6.7 min. <sup>1</sup>H NMR (400 MHz, CDCl<sub>3</sub>)  $\delta$  7.49-7.41 (m, 2H), 7.40-7.33 (m, 4H), 7.32-7.18 (m, 4H), 6.55 (d,  $J$  = 15.9 Hz, 1H), 6.38 (dd,  $J$  = 15.9, 8.6 Hz, 1H), 3.85 (d,  $J$  = 8.6 Hz, 1H), 2.65-2.30 (m, 4H), 1.69-1.55 (m, 4H), 1.51-1.40 (m, 2H).

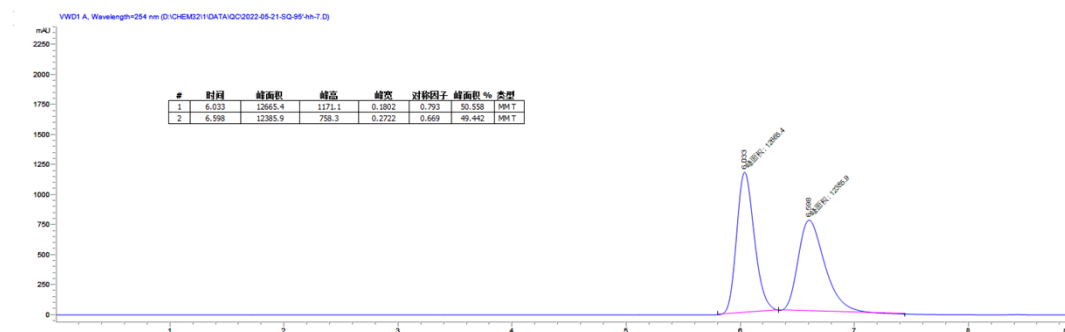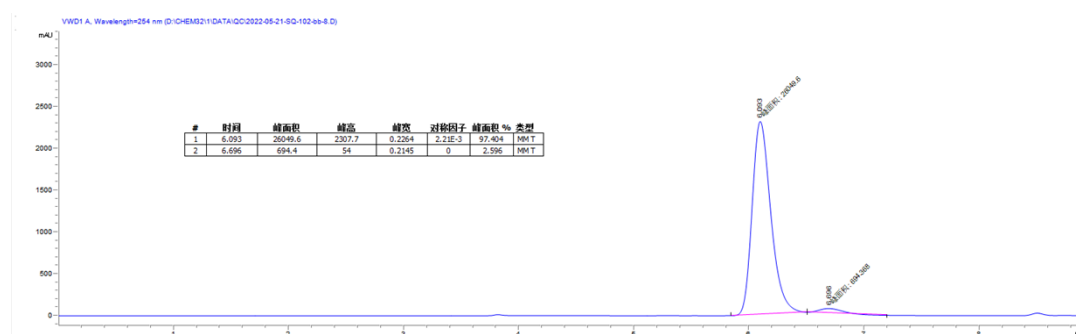

**(*S,E*)-1-(1,3-Diphenylallyl)pyrrolidine (8d).**<sup>[1]</sup> Colorless oil was obtained in 98%

yield. 92% ee was determined by chiral HPLC (Chiralpak AD-H, *n*-hexane/*i*-PrOH = 98/2, 0.8 mL/min, 254 nm, 25 °C):  $t_R$  (minor) = 6.8 min,  $t_R$  (major) = 7.3 min. <sup>1</sup>H NMR (400 MHz, CDCl<sub>3</sub>)  $\delta$  7.49-7.42 (m, 2H), 7.41-7.32 (m, 4H), 7.32-7.24 (m, 3H), 7.23-7.18 (m, 1H), 6.59 (d,  $J$  = 15.8 Hz, 1H), 6.45 (dd,  $J$  = 15.8, 8.6 Hz, 1H), 3.79 (d,  $J$  = 8.6 Hz, 1H), 2.65-2.53 (m, 2H), 2.52-2.39 (m, 2H), 1.88-1.74 (m, 4H).



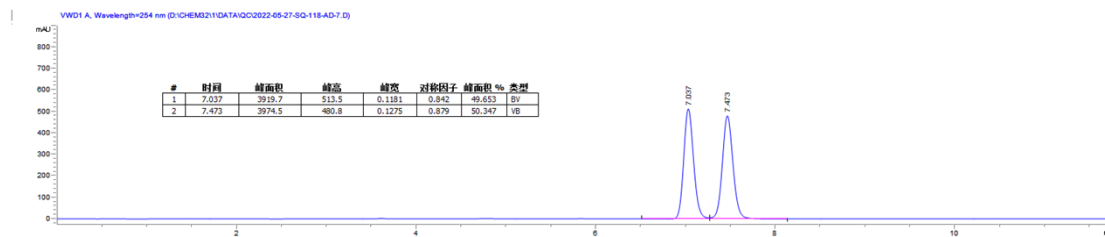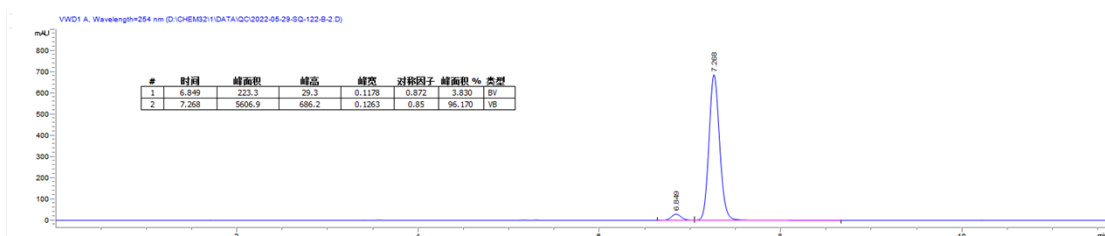

**(*S,E*)-*N*-(1,3-diphenylallyl)aniline (**8e**).**<sup>[1]</sup> Colorless oil was obtained in 77% yield.

88% ee was determined by chiral HPLC (Chiralpak AD-H, *n*-hexane/*i*-PrOH = 95/5, 1

mL/min, 254 nm, 40 °C):  $t_R$  (minor) = 7.5 min,  $t_R$  (major) = 8.8 min. <sup>1</sup>H NMR (400

MHz,  $\text{CDCl}_3$ )  $\delta$  7.50-7.42 (m, 2H), 7.42-7.35 (m, 4H), 7.34-7.28 (m, 3H), 7.26-7.23

(m, 1H), 7.16 (t,  $J = 7.7$  Hz, 2H), 6.73 (t,  $J = 7.4$  Hz, 1H), 6.70-6.59 (m, 3H), 6.42 (dd,  $J = 15.8,$

6.1 Hz, 1H), 5.11 (d,  $J = 6.1$  Hz, 1H), 4.18 (br, 1H).

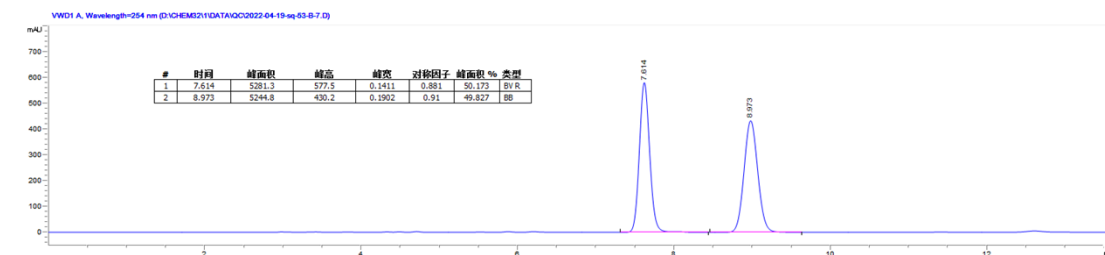

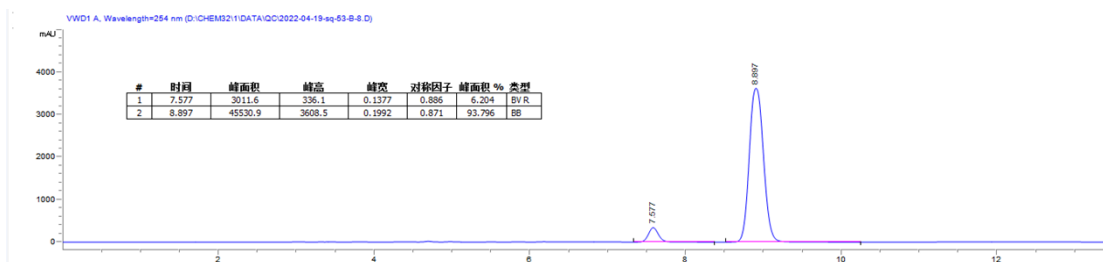

**(*S,E*)-*N*-(1,3-diphenylallyl)-2-methylaniline (8f)**. Colorless oil was obtained in 83% yield. 75% ee was determined by chiral HPLC (Chiralpak OD-H, *n*-hexane/*i*-PrOH = 98/2, 1 mL/min, 254 nm, 25 °C):  $t_R$  (major) = 24.7 min,  $t_R$  (minor) = 32.1 min.  $^1\text{H}$  NMR (400 MHz,  $\text{CDCl}_3$ )  $\delta$  7.537.47(m, 2H), 7.45-7.39 (m, 4H), 7.37-7.32 (m, 3H), 7.30-7.27 (m, 1H), 7.17-7.04 (m, 2H), 6.76-6.60 (m, 3H), 6.49 (dd,  $J$  = 15.8, 6.3 Hz, 1H), 5.19 (d,  $J$  = 6.3 Hz, 1H), 4.01 (br, 1H), 2.26 (s, 3H).  $^{13}\text{C}$  NMR (100 MHz,  $\text{CDCl}_3$ )  $\delta$  145.2, 142.2, 136.7, 131.2, 131.0, 130.1, 128.9, 128.6, 127.8, 127.6, 127.2, 127.1, 126.6, 122.2, 117.4, 111.4, 60.6, 17.8. HRMS  $[\text{M}+\text{H}]^+$  calcd. for  $\text{C}_{22}\text{H}_{22}\text{N}^+$ : 300.1747, found: 300.1748.

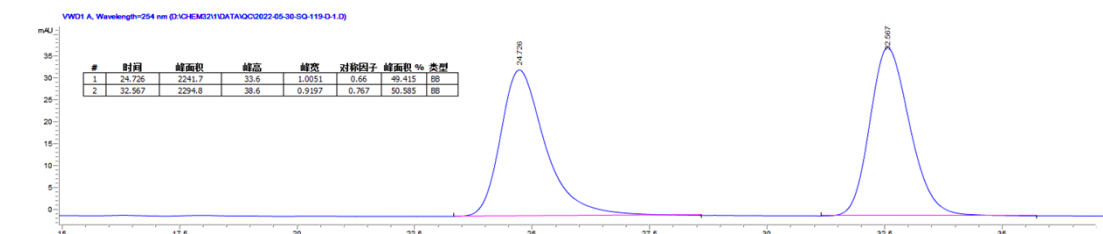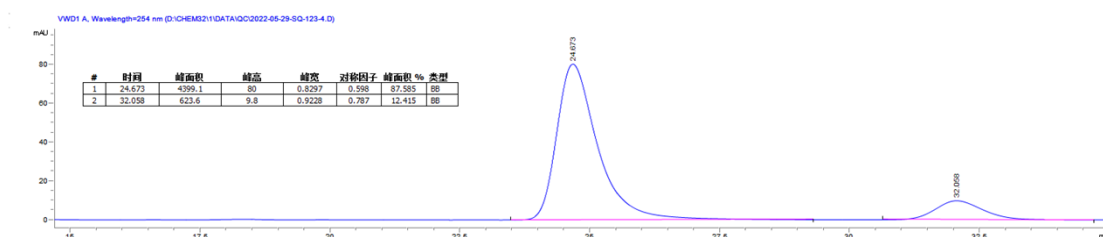

**(*S,E*)-*N*-(1,3-diphenylallyl)-3-methylaniline (8g)**. Colorless oil was obtained in 83% yield. 86% ee was determined by chiral HPLC (Chiralpak AD-H, *n*-hexane/*i*-PrOH =

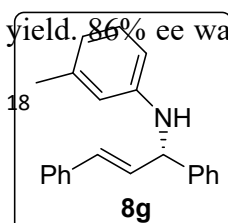

98/2, 1 mL/min, 254 nm, 40 °C):  $t_R$  (minor) = 15.1 min,  $t_R$  (major) = 16.7 min.  $^1\text{H}$  NMR (400 MHz,  $\text{CDCl}_3$ )  $\delta$  7.51-7.45 (m, 2H), 7.45-7.38 (m, 4H), 7.37-7.31 (m, 3H), 7.30-7.26 (m, 1H), 7.08 (t,  $J = 7.7$  Hz, 1H), 6.68 (d,  $J = 15.9$  Hz, 1H), 6.59 (d,  $J = 7.5$  Hz, 1H), 6.56-6.41 (m, 3H), 5.13 (d,  $J = 6.1$  Hz, 1H), 2.30 (s, 3H).  $^{13}\text{C}$  NMR (100 MHz,  $\text{CDCl}_3$ )  $\delta$  147.4, 142.3, 139.0, 136.8, 131.1, 130.9, 129.1, 128.9, 128.6, 127.7, 127.6, 127.3, 126.6, 118.8, 114.5, 110.7, 60.7, 21.7. HRMS  $[\text{M}+\text{H}]^+$  calcd. for  $\text{C}_{22}\text{H}_{22}\text{N}^+$ : 300.1747, found: 300.1746.

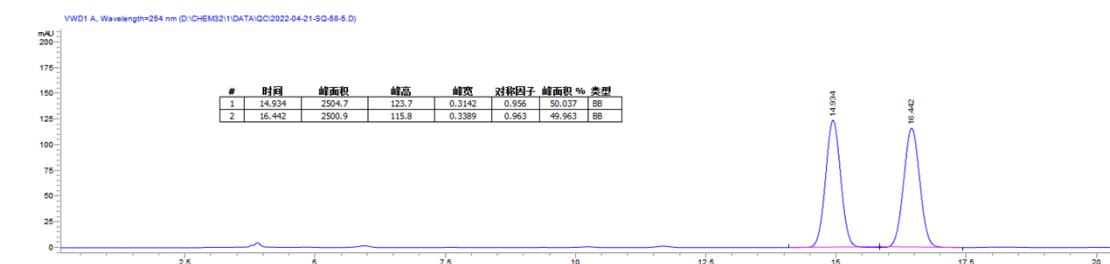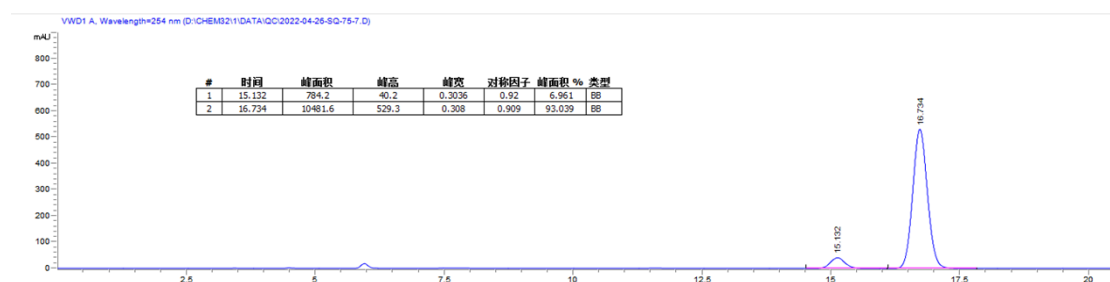

**(*S,E*)-*N*-(1,3-diphenylallyl)-4-methylaniline (8h).**<sup>[6]</sup> Colorless oil was obtained in 89%

yield. 88% ee was determined by chiral HPLC (Chiralpak AD-H, *n*-hexane/*i*-PrOH = 98/2, 1 mL/min, 254 nm, 40 °C):  $t_R$  (minor) = 17.6 min,  $t_R$  (major) = 21.9 min.  $^1\text{H}$  NMR (400 MHz,  $\text{CDCl}_3$ )  $\delta$  7.53-7.45 (m, 2H), 7.45-7.37 (m, 4H), 7.37-7.30 (m, 3H), 7.29-7.23 (m, 1H), 7.01 (d,  $J = 7.9$  Hz, 2H), 6.73-6.56 (m, 3H), 6.44 (dd,  $J = 15.9, 6.2$  Hz, 1H), 5.10 (d,  $J = 6.2$  Hz, 1H), 4.05 (br, 1H), 2.27 (s, 3H).

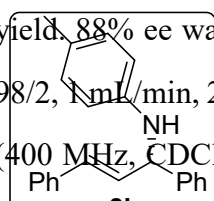

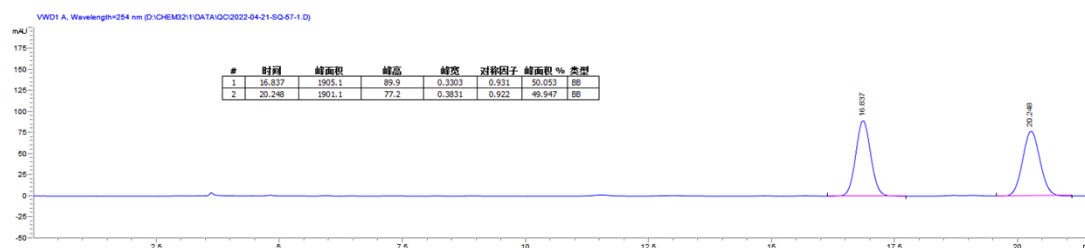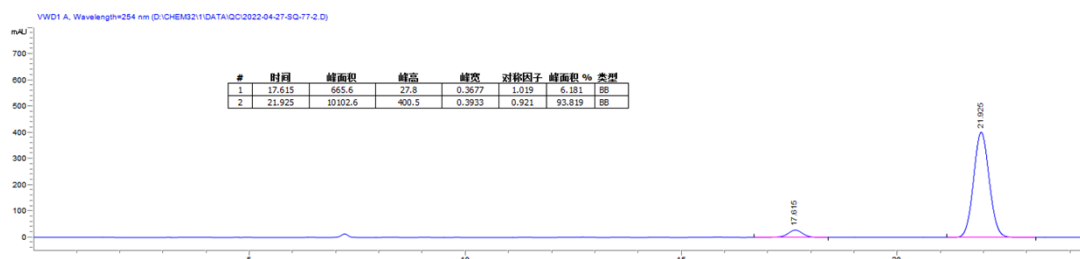

**(*S,E*)-*N*-(1,3-diphenylallyl)-4-methoxyaniline (8i).**<sup>[7]</sup> Colorless oil was obtained in

90% yield. 88% ee was determined by chiral HPLC (Chiralpak AD-H, *n*-hexane/*i*-PrOH = 95/5, 0.8 mL/min, 254 nm, 25 °C):  $t_R$  (minor) = 14.5 min,  $t_R$  (major) = 19.0

min. <sup>1</sup>H NMR (400 MHz, CDCl<sub>3</sub>)  $\delta$  7.52-7.44 (m, 2H), 7.44-7.37 (m, 4H), 7.36-7.30 (m, 3H), 7.28-7.24 (m, 1H), 6.78 (d,  $J$  = 8.4 Hz, 2H), 6.71-6.60 (m, 3H), 6.44 (dd,  $J$  = 15.8, 6.3 Hz, 1H), 5.05 (d,  $J$  = 6.3 Hz, 1H), 3.76 (s, 3H).

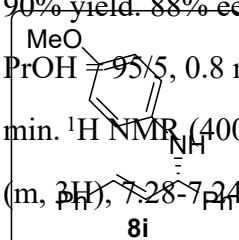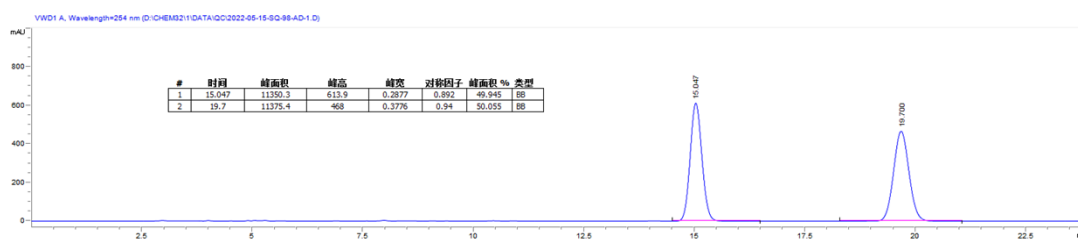

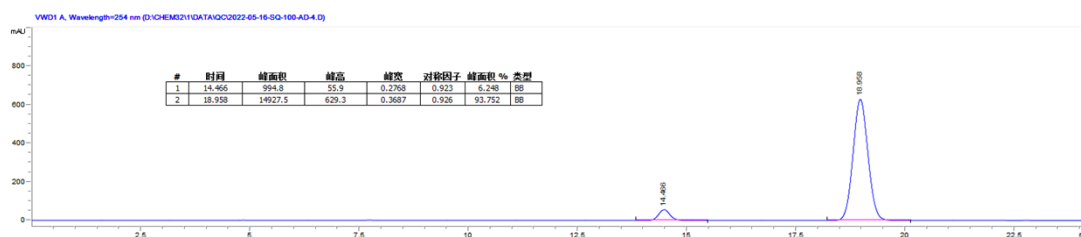

**(*S,E*)-4-bromo-*N*-(1,3-diphenylallyl)aniline (8j).**<sup>[8]</sup> Colorless oil was obtained in 87% yield. 82% ee was determined by chiral HPLC (Chiralpak AD-H, *n*-hexane/*i*-PrOH = 90/10, 1 mL/min, 254 nm, 25 °C):  $t_R$  (minor) = 9.7 min,  $t_R$  (major) = 12.4 min. <sup>1</sup>H NMR (400 MHz, CDCl<sub>3</sub>)  $\delta$  7.46-7.36 (m, 6H), 7.35-7.29 (m, 3H), 7.28-7.20 (m, 3H), 6.63 (d,  $J$  = 15.9 Hz, 1H), 6.53 (d,  $J$  = 8.3 Hz, 2H), 6.39 (dd,  $J$  = 15.9, 6.2 Hz, 1H), 5.06 (d,  $J$  = 6.2 Hz, 1H).

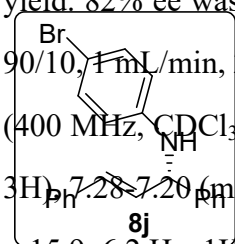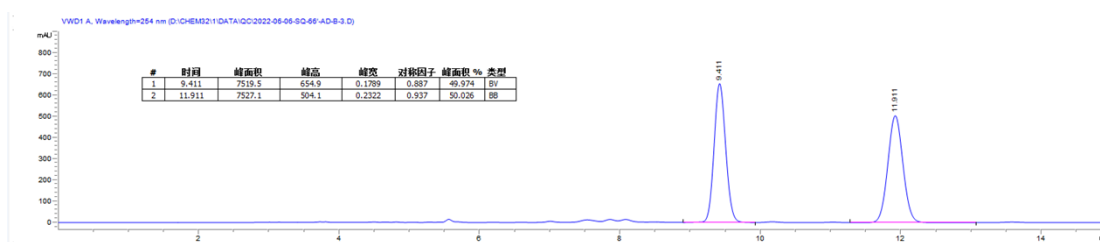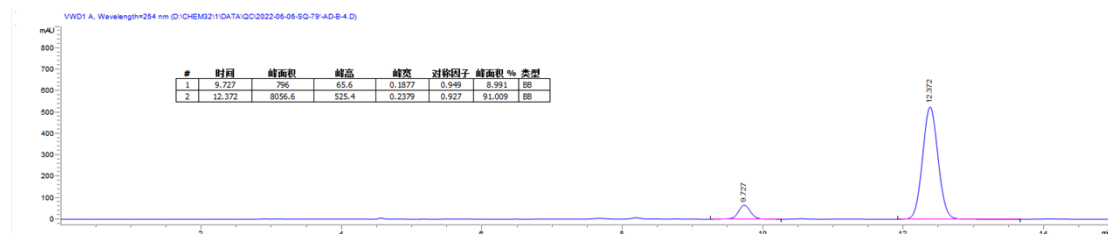

**(*S,E*)-4-fluorophenyl-*N*-(1,3-diphenylallyl)aniline (8k).**<sup>[9]</sup> Colorless oil was obtained in 98% yield. 90% ee was determined by chiral HPLC (Chiralpak AD-H, *n*-hexane/*i*-PrOH = 98/2, 1 mL/min, 254 nm, 40 °C):  $t_R$  (minor) = 18.6 min,  $t_R$  (major) = 23.8 min. <sup>1</sup>H NMR (400 MHz, CDCl<sub>3</sub>)  $\delta$  7.52-7.43 (m, 2H), 7.43-7.36 (m, 4H), 7.36-7.29 (m,

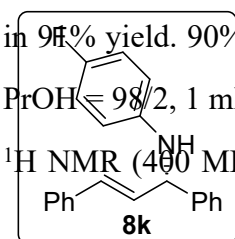

3H), 7.29-7.25 (m, 1H), 6.88 (t,  $J = 8.5$  Hz, 2H), 6.71-6.52 (m, 3H), 6.42 (dd,  $J = 15.8$ , 6.3 Hz, 1H), 5.05 (d,  $J = 6.3$  Hz, 1H).

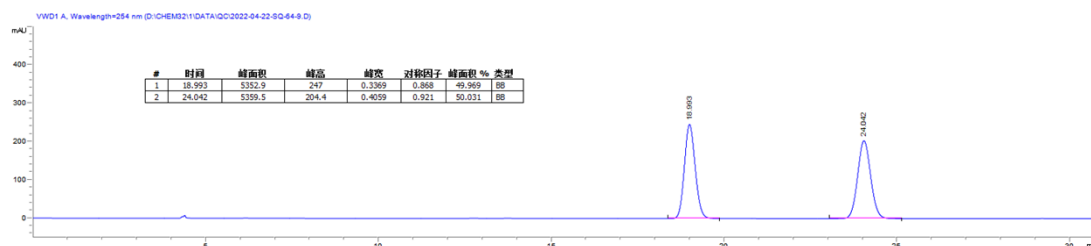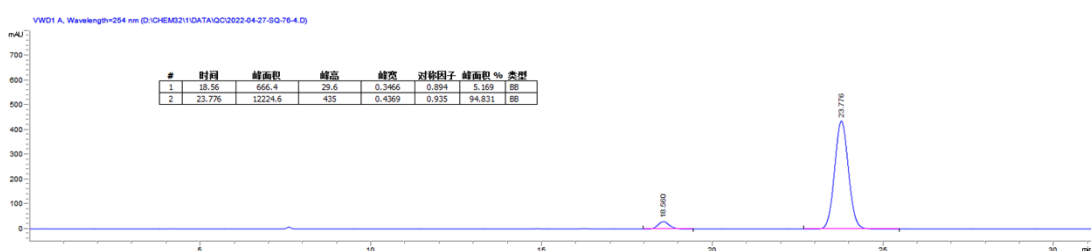

**(*S,E*)-*N*-(1,3-diphenylallyl)-3,5-dimethylaniline (81)**.<sup>[10]</sup> Colorless oil was obtained in 88% yield. 85% ee was determined by chiral HPLC (Chiralpak AD-H, *n*-hexane/*i*-PrOH = 98/2, 1 mL/min, 254 nm, 40 °C):  $t_R$  (major) = 5.2 min,  $t_R$  (minor) = 6.2 min. <sup>1</sup>H NMR (400 MHz, CDCl<sub>3</sub>)  $\delta$  7.51--7.46 (m, 2H), 7.45-7.39 (m, 4H), 7.37-7.31 (m, 3H), 7.30-7.26 (m, 1H), 6.69 (d,  $J = 15.8$  Hz, 1H), 6.50-6.40 (m, 2H), 6.35 (s, 2H), 5.13 (d,  $J = 6.0$  Hz, 1H), 2.27 (s, 6H).

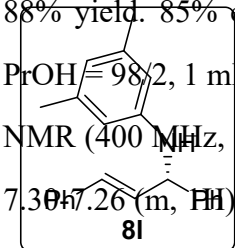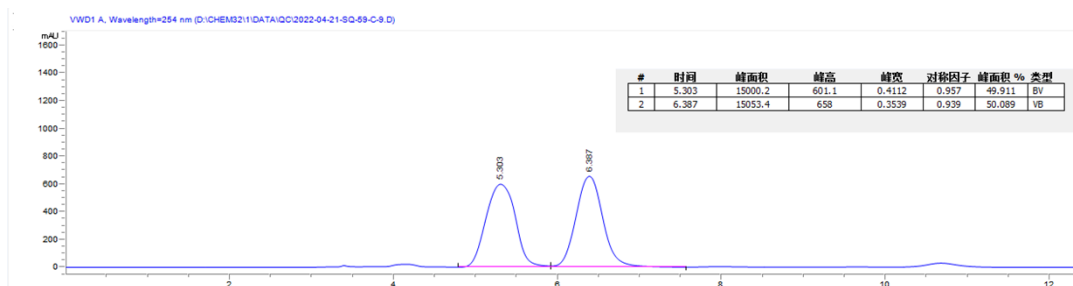

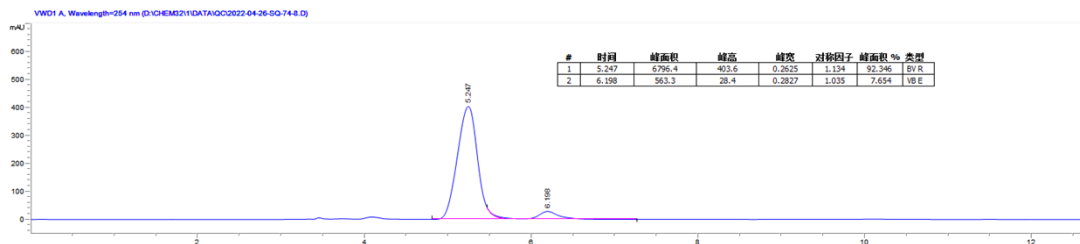

**(*S,E*)-*N*-(1,3-diphenylallyl)-3,4,5-trimethoxyaniline (8m).** Colorless oil was

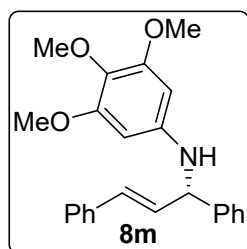

obtained in 99% yield. 90% ee was determined by chiral HPLC (Chiralpak AD-H, *n*-hexane/*i*-PrOH = 70/30, 0.8 mL/min, 254 nm, 40 °C):  $t_R$  (major) = 10.8 min,  $t_R$  (minor) = 16.4 min.  $^1\text{H}$  NMR (400 MHz,  $\text{CDCl}_3$ )  $\delta$  7.50-7.46 (m, 2H), 7.43-7.38 (m, 4H), 7.36-

7.31 (m, 3H), 7.28-7.24 (m, 1H), 6.68 (d,  $J = 15.8$  Hz, 1H), 6.43 (dd,  $J = 15.8, 6.4$  Hz, 1H), 5.93 (s, 2H), 5.07 (d,  $J = 6.4$  Hz, 1H), 3.78 (s, 3H), 3.76 (s, 6H).  $^{13}\text{C}$  NMR (100 MHz,  $\text{CDCl}_3$ )  $\delta$  153.8, 144.1, 142.3, 136.7, 131.3, 130.9, 129.0, 128.6, 127.8, 127.7, 127.2, 126.5, 91.4, 61.5, 61.1, 55.9. HRMS  $[\text{M}+\text{H}]^+$  calcd. for  $\text{C}_{24}\text{H}_{26}\text{NO}_3^+$ : 376.1907, found: 376.1905.

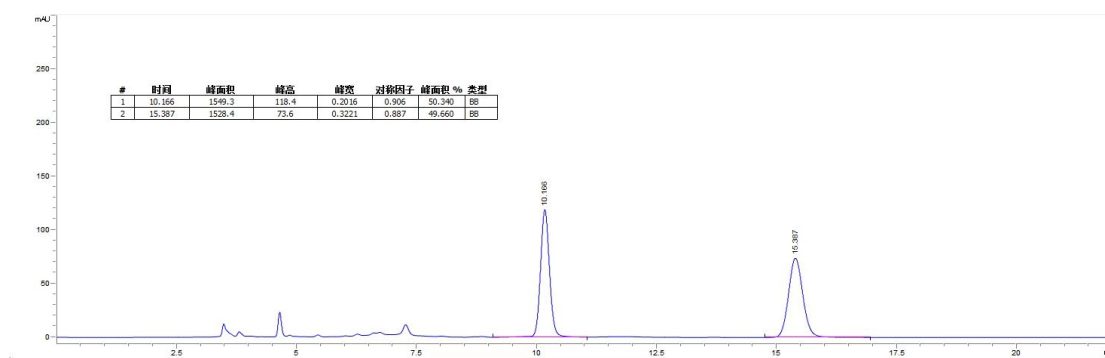

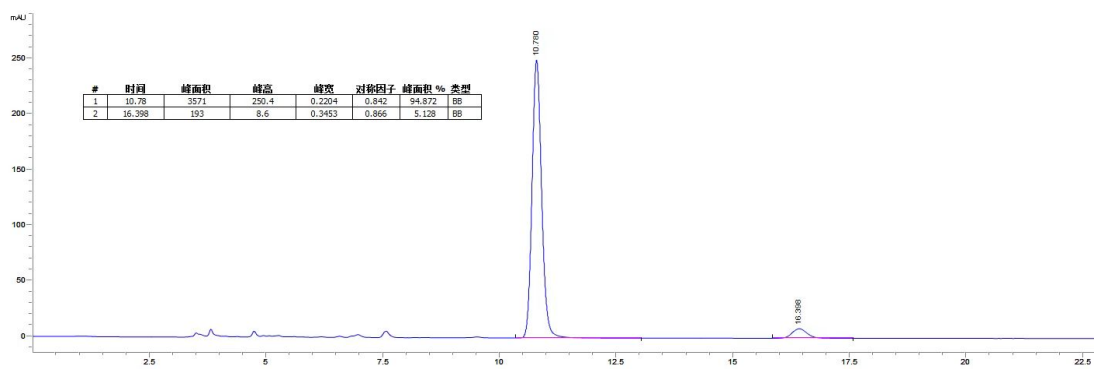



**Methyl (*S,E*)-4-((1,3-diphenylallyl)amino)benzoate (**8n**).**<sup>[11]</sup> Colorless oil was

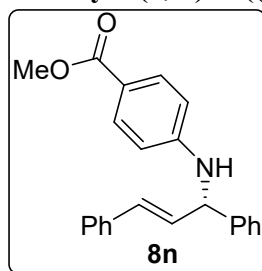

obtained in 99% yield. 88% ee was determined by chiral HPLC (Chiralpak AD-H, *n*-hexane/*i*-PrOH = 70/30, 0.8 mL/min, 254 nm, 40 °C):  $t_R$  (minor) = 10.2 min,  $t_R$  (major) = 14.1 min. <sup>1</sup>H NMR (400 MHz, CDCl<sub>3</sub>)  $\delta$  7.90-7.85 (m, 2H), 7.45-7.42 (m, 2H), 7.41-7.38 (m, 3H), 7.37-7.34 (m, 1H), 7.34-7.30 (m, 2H), 7.29-7.25 (m, 1H), 6.67-6.59 (m, 3H), 6.41 (dd,  $J$  = 15.8, 6.0 Hz, 1H), 5.21 (d,  $J$  = 6.0 Hz, 1H), 4.60 (s, 1H), 3.86 (s, 3H).

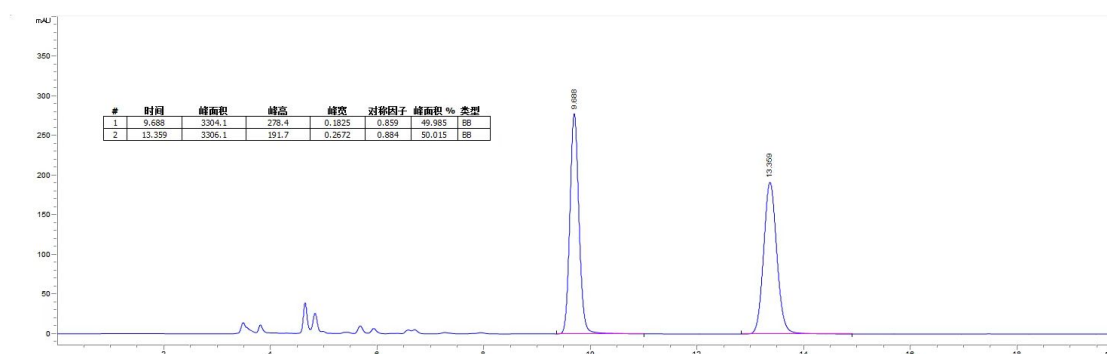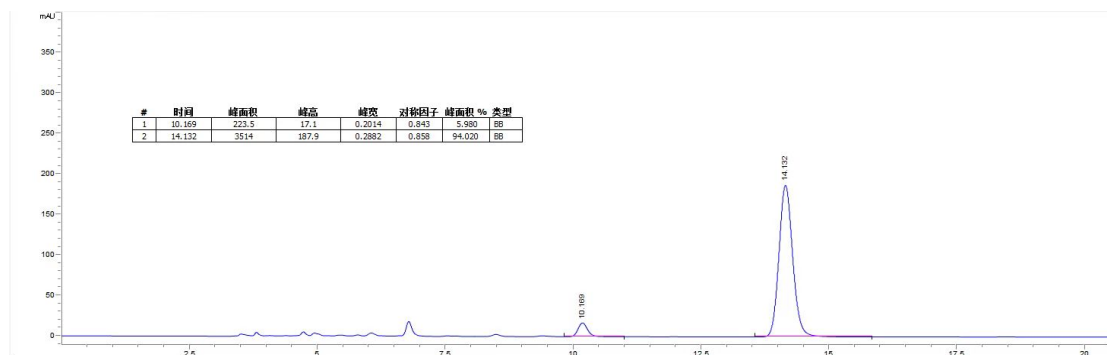

**(*S,E*)-1-(1,3-di(thiophen-2-yl)allyl)piperidine (8o)**. Colorless oil was obtained in

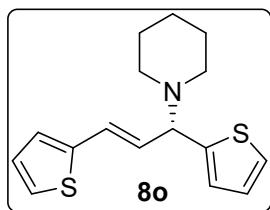

99% yield. 65% ee was determined by chiral HPLC (Chiralpak

AD-H, *n*-hexane/*i*-PrOH = 95/5, 0.8 mL/min, 254 nm, 40 °C):

$t_R$  (minor) = 4.9 min,  $t_R$  (major) = 5.2 min.  $^1\text{H}$  NMR (400 MHz,

$\text{CDCl}_3$ )  $\delta$  7.28-7.25 (m, 1H), 7.19-7.16 (m, 1H), 7.00-6.97 (m,

3H), 6.96-6.93 (m, 1H), 6.71 (d,  $J$  = 15.6 Hz, 1H), 6.26 (dd,  $J$  = 15.6, 8.4 Hz, 1H), 4.27

(d,  $J$  = 8.4 Hz, 1H), 2.63-2.53 (m, 2H), 2.52-2.42 (m, 2H), 1.67-1.57 (m, 4H), 1.51-1.41

(m, 2H).  $^{13}\text{C}$  NMR (100 MHz,  $\text{CDCl}_3$ )  $\delta$  142.0, 129.5, 127.4, 126.5, 125.6, 125.5, 124.8,

124.7, 124.2, 68.6, 51.8, 26.2, 24.6. HRMS  $[\text{M}+\text{H}]^+$  calcd. for  $\text{C}_{16}\text{H}_{20}\text{NS}_2^+$ : 290.1032,

found: 290.1032.

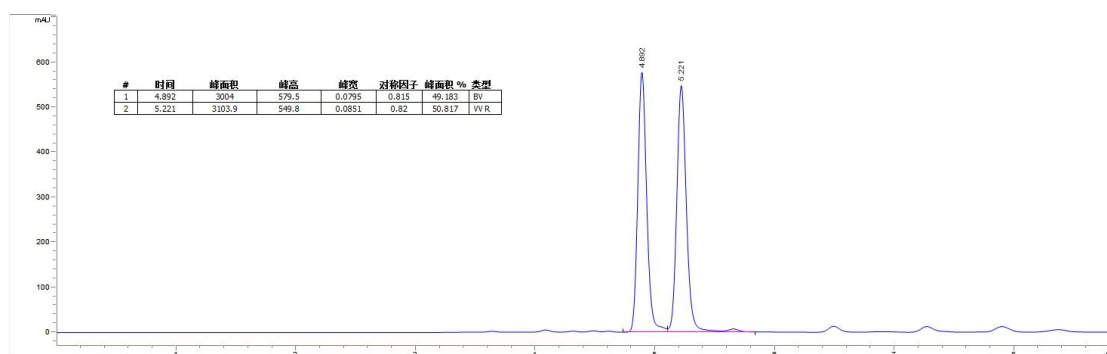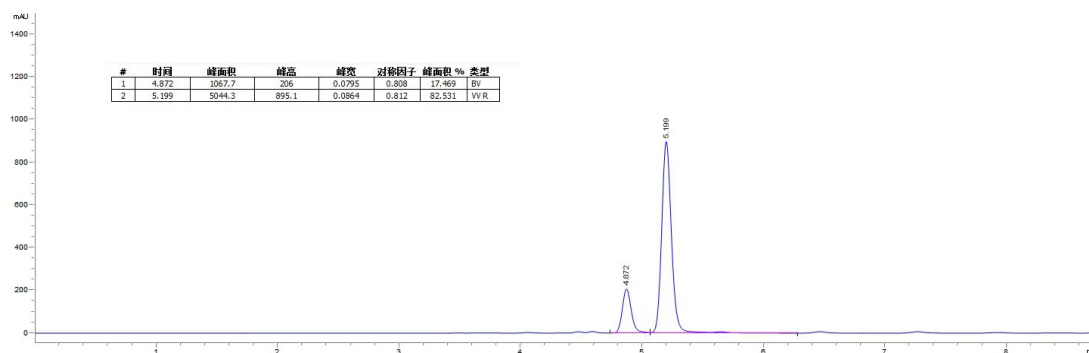

## General Procedure for Pd-Catalyzed Asymmetric Allylic Etherification

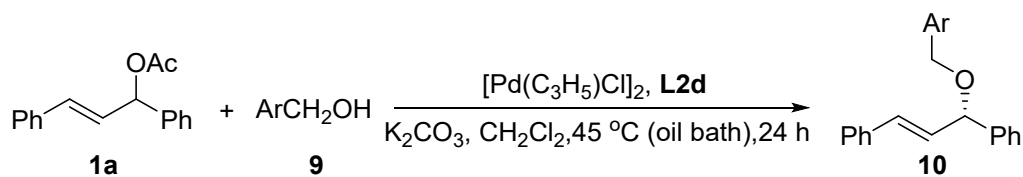

Ligand (*S,S*)-**L2d** (0.012 mmol) and  $[\text{Pd}(\text{C}_3\text{H}_5\text{Cl})_2]$  (0.006 mmol) were dissolved in  $\text{CH}_2\text{Cl}_2$  (1.0 mL) in a Schlenk tube under an  $\text{N}_2$  atmosphere. After 1 h of stirring at room temperature, 1,3-phenyl-2-propenyl acetate **1a** (0.2 mmol), alcohol **9** (0.6 mmol),  $\text{K}_2\text{CO}_3$  (1.0 mmol) and  $\text{CH}_2\text{Cl}_2$  (2.0 mL) was added. The mixture was heated to  $45\text{ }^\circ\text{C}$  (oil bath) for 24 h. After cooling to room temperature, the solvent was removed under reduced pressure and the residue was purified by flash column chromatography, eluting with petroleum ether and ethyl acetate to afford the corresponding product.

**(S, E)**-**(3-(benzyloxy)prop-1-ene-1,3-diyl)dibenzene (10a)**.<sup>[1]</sup> Colorless oil was

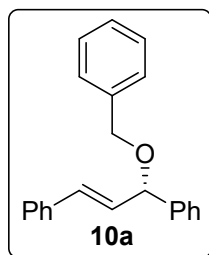

obtained in 84% yield. 95% ee was determined by chiral HPLC (Chiralpak OJ-H, *n*-hexane/*i*-PrOH = 98/2, 0.8 mL/min, 254 nm,  $40\text{ }^\circ\text{C}$ ):  $t_R$  (major) = 20.3 min,  $t_R$  (minor) = 24.5 min.  $^1\text{H}$  NMR (400 MHz, Chloroform-*d*)  $\delta$  7.47-7.42 (m, 2H), 7.42-7.34 (m, 8H), 7.33-7.28 (m, 4H), 7.26-7.23 (m, 1H), 6.64 (d,  $J = 15.9$  Hz, 1H), 6.35 (dd,  $J = 15.9, 7.0$  Hz, 1H), 5.03 (d,  $J = 7.0$  Hz, 1H), 4.59 (s, 2H).

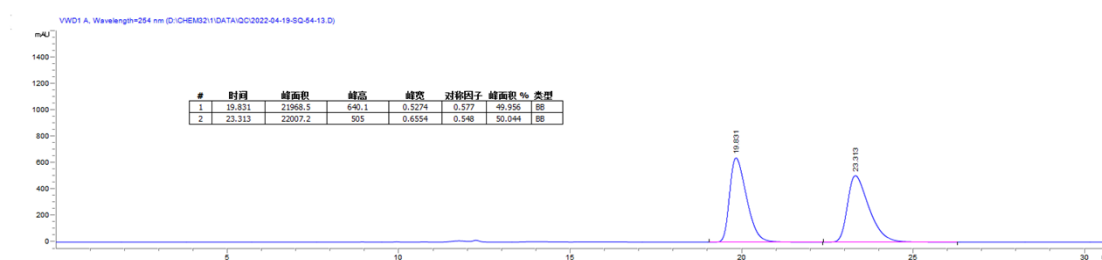

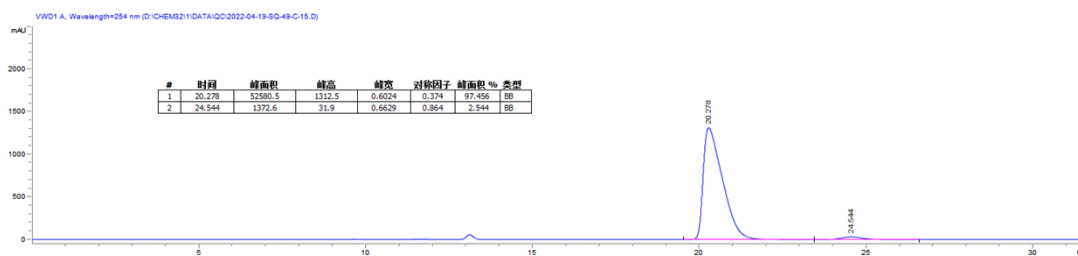

**(S, E)-3-((2-methylbenzyl)oxy)prop-1-ene-1,3-diyl)dibenzene (10b).**<sup>[12]</sup> Colorless

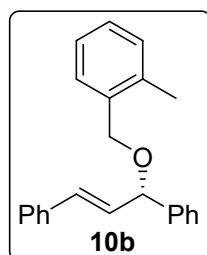

oil was obtained in 80% yield. 89% ee was determined by chiral HPLC (Chiralpak AD-H, *n*-hexane/*i*-PrOH = 98/2, 1 mL/min, 254 nm, 40 °C):  $t_R$  (minor) = 7.2 min,  $t_R$  (major) = 8.8 min. <sup>1</sup>H NMR (400 MHz, CDCl<sub>3</sub>)  $\delta$  7.51-7.47 (m, 2H), 7.46-7.40 (m, 5H), 7.38-7.32 (m, 3H), 7.29-7.21 (m, 4H), 6.70 (d,  $J$  = 15.9 Hz, 1H), 6.40 (dd,  $J$  = 15.9, 7.0 Hz, 1H), 5.07 (d,  $J$  = 7.0 Hz, 1H), 4.61 (q,  $J$  = 11.8 Hz, 2H), 2.38 (s, 3H).

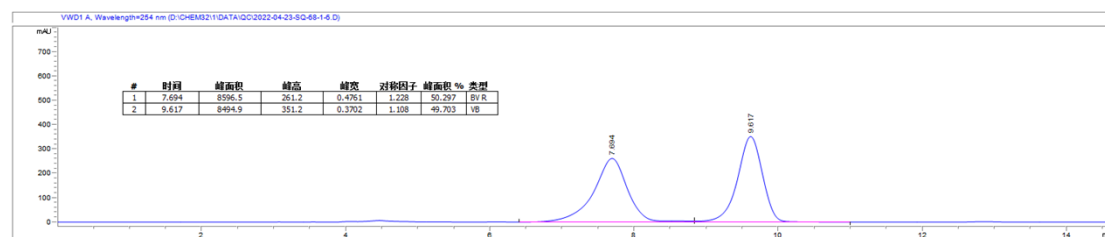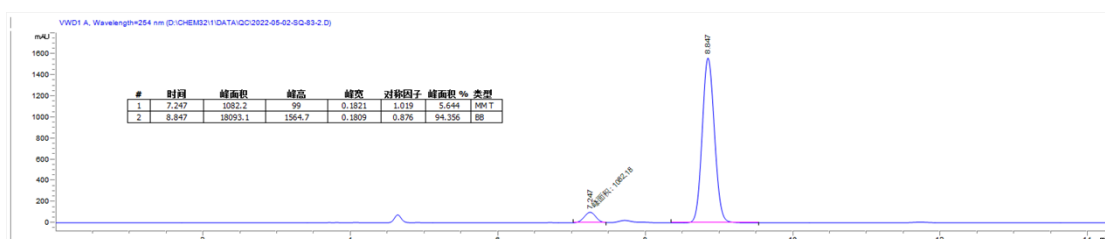

**(S, E)-3-((2-chlorobenzyl)oxy)prop-1-ene-1,3-diyl)dibenzene (10c).**<sup>[13]</sup> Colorless

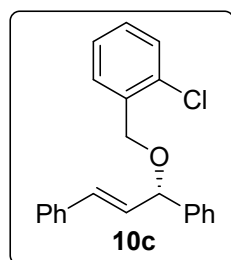

oil was obtained in 80% yield. 95% ee was determined by chiral HPLC (Chiralpak OD-H, *n*-hexane/*i*-PrOH = 98/2, 0.5 mL/min, 254 nm, 25 °C):  $t_R$  (major) = 9.8 min,  $t_R$  (minor) = 10.3 min. <sup>1</sup>H NMR (400 MHz, CDCl<sub>3</sub>)  $\delta$  7.63 (d,  $J$  = 7.6 Hz, 1H), 7.54-7.47 (m,

2H), 7.46- 7.39 (m, 4H), 7.39-7.29 (m, 5H), 7.28-7.23 (m, 2H), 6.71 (d,  $J = 15.9$  Hz, 1H), 6.39 (dd,  $J = 15.9, 7.0$  Hz, 1H), 5.10 (d,  $J = 7.0$  Hz, 1H), 4.71 (q,  $J = 13.1$  Hz, 2H).

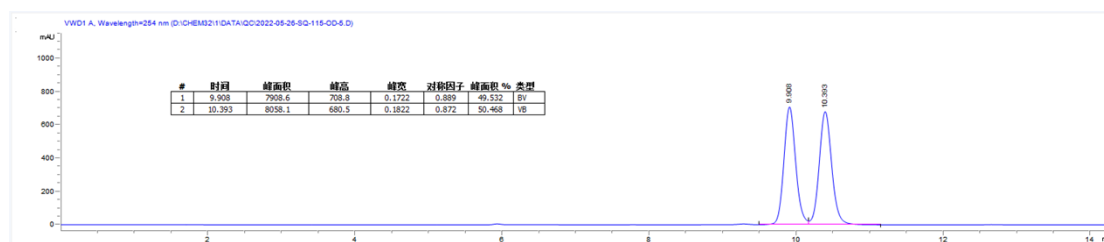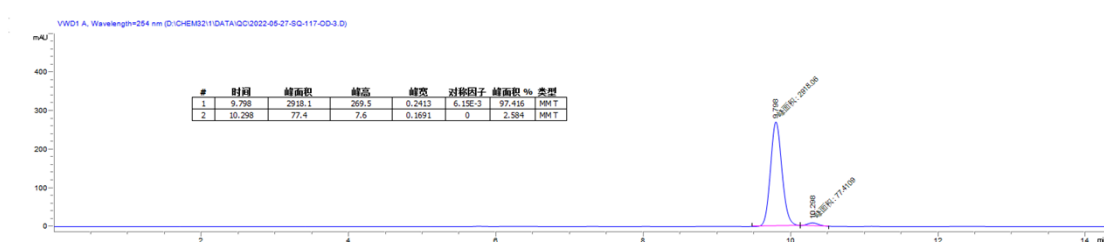

**(*S, E*)-(3-((3-methoxybenzyl)oxy)prop-1-ene-1,3-diyl)dibenzene (10d).**<sup>[12]</sup> Colorless

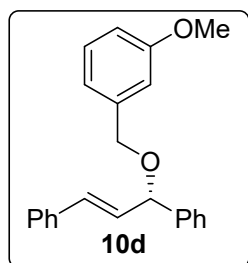

oil was obtained in 70% yield. 95% ee was determined by chiral HPLC (Chiralpak OJ-H, *n*-hexane/*i*-PrOH = 50/50, 0.5 mL/min, 254 nm, 25 °C):  $t_R$  (major) = 18.7 min,  $t_R$  (minor) = 21.1 min.  $^1\text{H}$  NMR (400 MHz,  $\text{CDCl}_3$ )  $\delta$  7.50-7.45 (m, 2H), 7.44-7.38 (m, 4H), 7.37-7.30 (m, 4H), 7.28-7.24 (m, 1H), 7.02-6.94 (m, 2H), 6.87 (d,  $J = 8.2$  Hz, 1H), 6.67 (d,  $J = 15.9$  Hz, 1H), 6.38 (dd,  $J = 15.9, 7.0$  Hz, 1H), 5.05 (d,  $J = 7.0$  Hz, 1H), 4.60 (s, 2H), 3.83 (s, 3H).

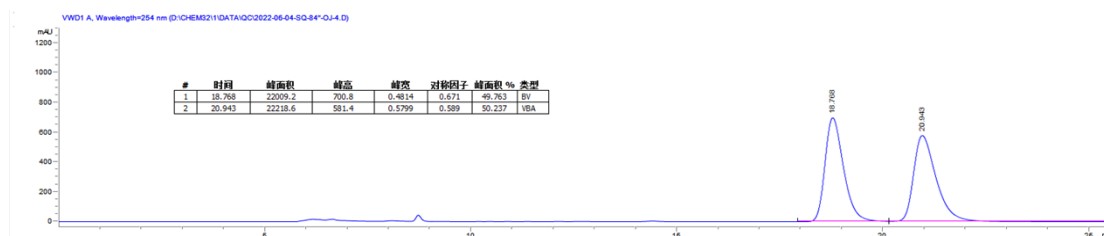

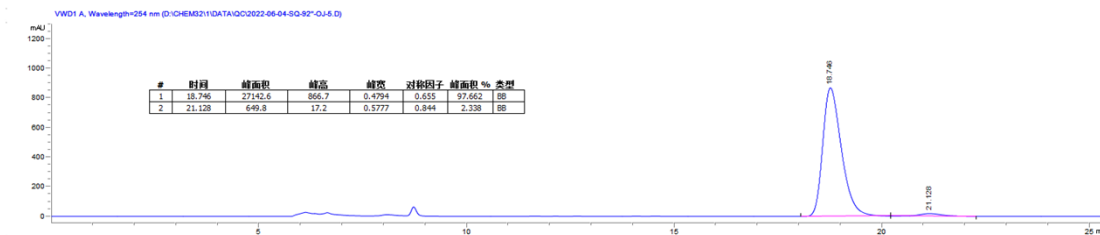

**(*S, E*)-3-((4-methylbenzyl)oxy)prop-1-ene-1,3-diyl)dibenzene (10e).**<sup>[12]</sup> Colorless

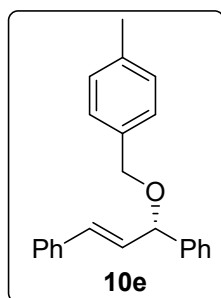

oil was obtained in 90% yield. 91% ee was determined by chiral HPLC (Chiralpak OJ-H, *n*-hexane/*i*-PrOH = 98/2, 0.75 mL/min, 254 nm, 40 °C):  $t_R$  (major) = 24.3 min,  $t_R$  (minor) = 27.9 min. <sup>1</sup>H NMR (400 MHz, CDCl<sub>3</sub>)  $\delta$  7.47-7.43 (m, 2H), 7.42-7.35 (m, 5H), 7.34-7.27 (m, 5H), 7.21-7.16 (m, 2H), 6.64 (d,  $J$  = 15.9 Hz, 1H), 6.35 (dd,  $J$  = 15.9, 7.0 Hz, 1H), 5.02 (d,  $J$  = 7.0 Hz, 1H), 4.56 (s, 2H), 2.37 (s, 3H).

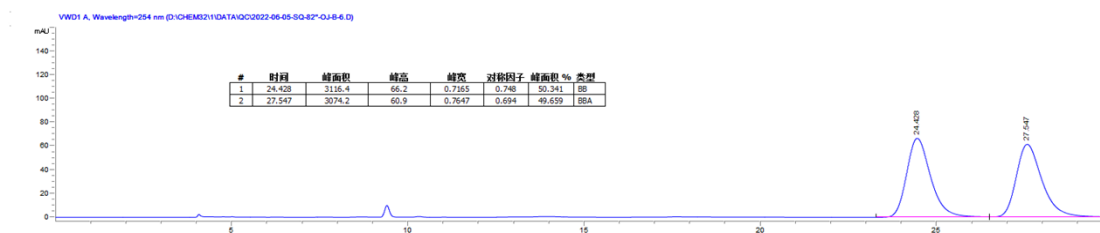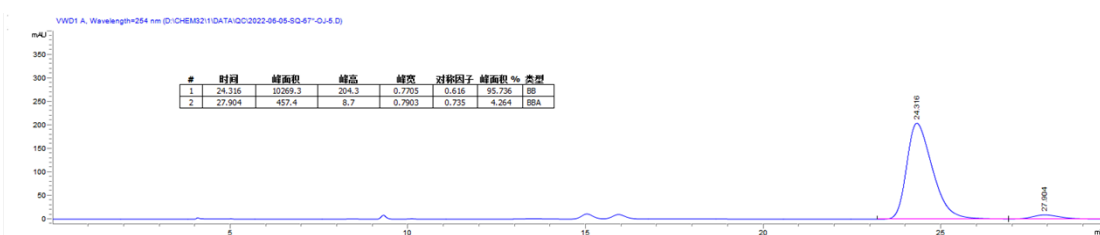

**(*S, E*)-3-((4-chlorobenzyl)oxy)prop-1-ene-1,3-diyl)dibenzene (10f).**<sup>[1]</sup> Colorless oil

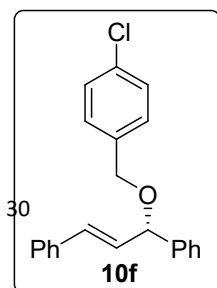

was obtained in 91% yield. 95% ee was determined by chiral HPLC (Chiralpak OD-H, *n*-hexane/*i*-PrOH = 95/5, 0.5 mL/min, 254 nm, 25 °C):  $t_R$  (major) = 9.8 min,  $t_R$  (minor) = 10.3 min. <sup>1</sup>H NMR (400 MHz,

CDCl<sub>3</sub>)  $\delta$  7.47-7.38 (m, 6H), 7.36-7.29 (m, 7H), 7.27-7.22 (m, 1H), 6.64 (d,  $J = 15.9$  Hz, 1H), 6.35 (dd,  $J = 15.9, 7.0$  Hz, 1H), 5.01 (d,  $J = 7.0$  Hz, 1H), 4.56 (q,  $J = 12.0$  Hz, 2H).

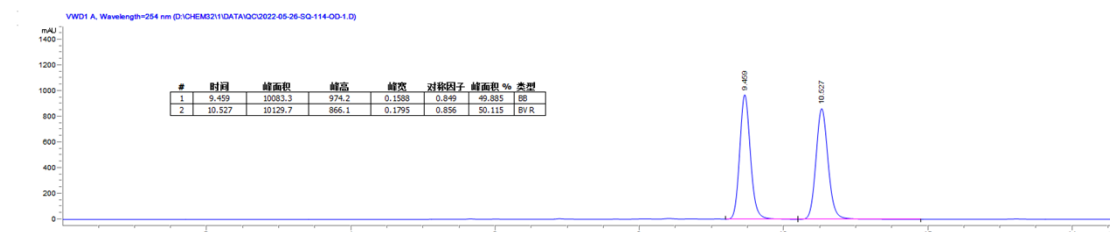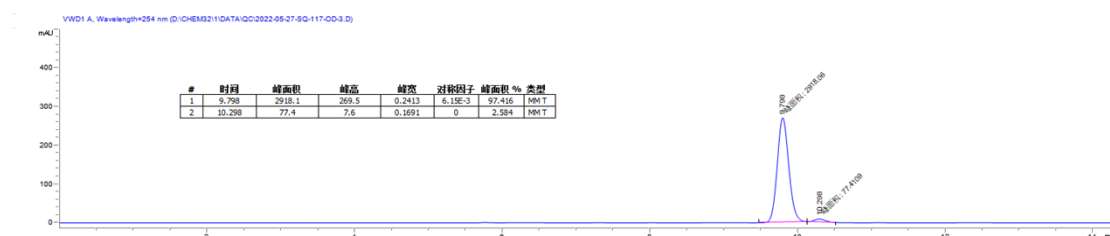

**(*S,E*)-3-((4-Fluorobenzyl)oxy)prop-1-ene-1,3-diyl)dibenzene (10g).**<sup>[12]</sup> Colorless

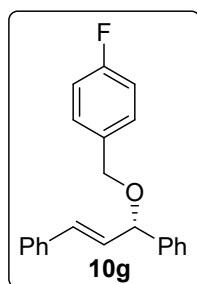

oil was obtained in 86% yield. 95% ee was determined by chiral HPLC (Chiralpak OD-H, *n*-hexane/*i*-PrOH = 99/1, 0.2mL/min, 254 nm, 25 °C):  $t_R$  (major) = 28.9 min,  $t_R$  (minor) = 34.0 min. <sup>1</sup>H NMR (400 MHz, CDCl<sub>3</sub>)  $\delta$  7.48-7.44 (m, 2H), 7.43-7.38 (m, 4H), 7.38-7.29 (m, 5H), 7.28-7.22 (m, 1H), 7.06 (t,  $J = 8.5$  Hz, 2H), 6.65 (d,  $J = 15.8$  Hz, 1H), 6.36 (dd,  $J = 15.8, 7.0$  Hz, 1H), 5.03 (d,  $J = 7.0$  Hz, 1H), 4.57 (q,  $J = 11.8$  Hz, 2H).

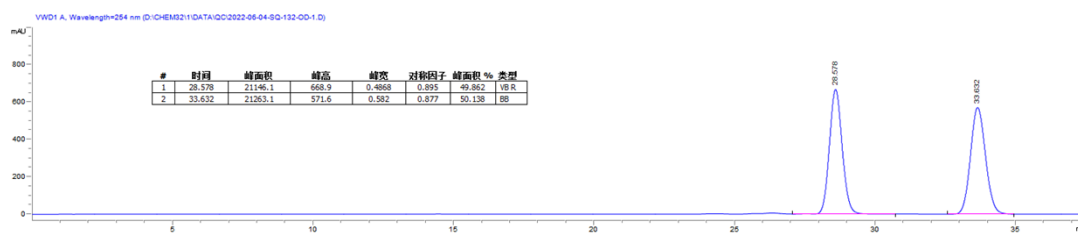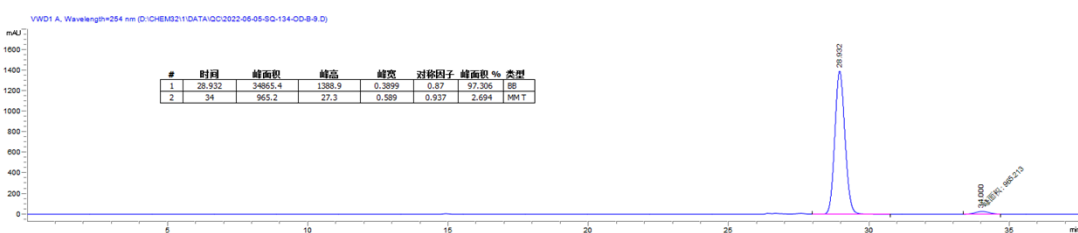

**(*S, E*)-3-((4-methoxybenzyl)oxy)prop-1-ene-1,3-diyl)dibenzene (10h).**<sup>[1]</sup> Colorless

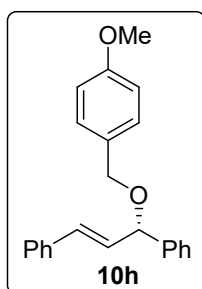

oil was obtained in 94% yield. 96% ee was determined by chiral HPLC (Chiralpak OJ-H, *n*-hexane/*i*-PrOH = 86/14, 0.7 mL/min, 254 nm, 25 °C):  $t_R$  (major) = 23.1 min,  $t_R$  (minor) = 27.2 min. <sup>1</sup>H NMR (400 MHz, CDCl<sub>3</sub>)  $\delta$  7.48-7.44 (m, 2H), 7.43-7.38 (m, 4H), 7.36-7.29 (m, 5H), 7.27-7.23 (m,  $J$  = 7.1 Hz, 1H), 6.92 (d,  $J$  = 8.1 Hz, 2H), 6.64 (d,  $J$  = 15.9 Hz, 1H), 6.37 (dd,  $J$  = 15.9, 7.0 Hz, 1H), 5.03 (d,  $J$  = 7.0 Hz, 1H), 4.54 (s, 2H), 3.84 (s, 3H).

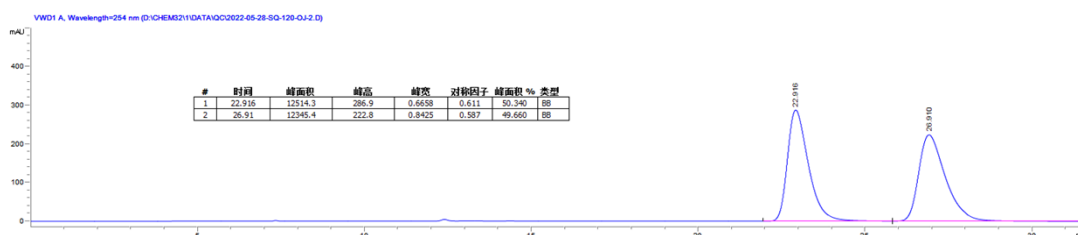



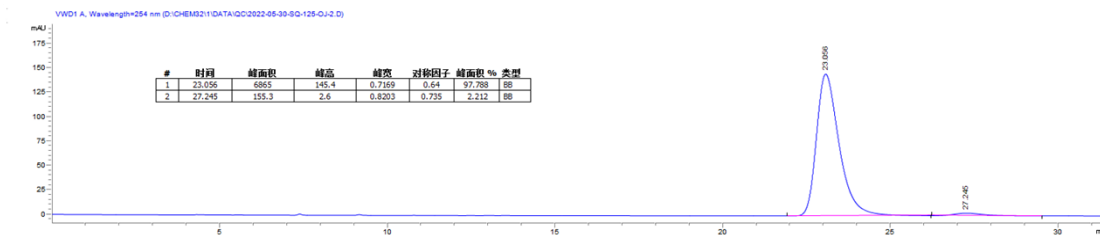

**(*S, E*)-3-(((3-methylbenzyl)oxy)prop-1-ene-1,3-diyl)dibenzene (10i).**<sup>[12]</sup> Colorless

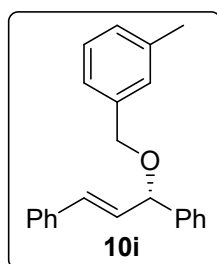

oil was obtained in 90% yield. 95% ee was determined by chiral HPLC (Chiralpak OJ-H, *n*-hexane/*i*-PrOH = 96/4, 0.8 mL/min, 254 nm, 40 °C):  $t_R$  (major) = 12.1 min,  $t_R$  (minor) = 15.1 min. <sup>1</sup>H NMR (400 MHz, CDCl<sub>3</sub>)  $\delta$  7.49-7.44 (m, 2H), 7.43-7.37 (m, 4H), 7.35-7.30 (m, 3H), 7.28-7.24 (m, 2H), 7.23-7.18 (m, 2H), 7.15-7.10 (m, 1H), 6.65 (d,  $J$  = 15.9 Hz, 1H), 6.37 (dd,  $J$  = 15.9, 7.0 Hz, 1H), 5.04 (d,  $J$  = 7.0 Hz, 1H), 4.57 (s, 2H), 2.38 (s, 3H).

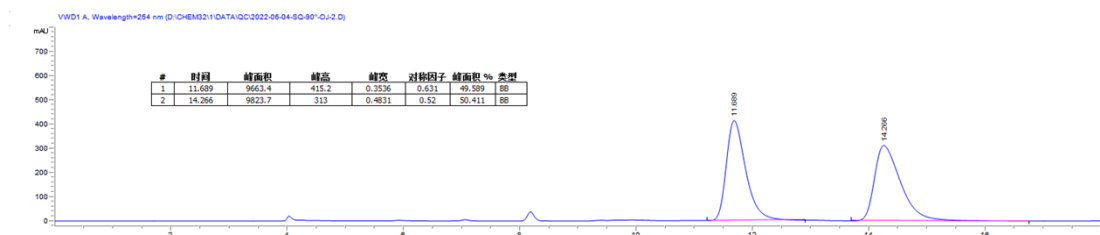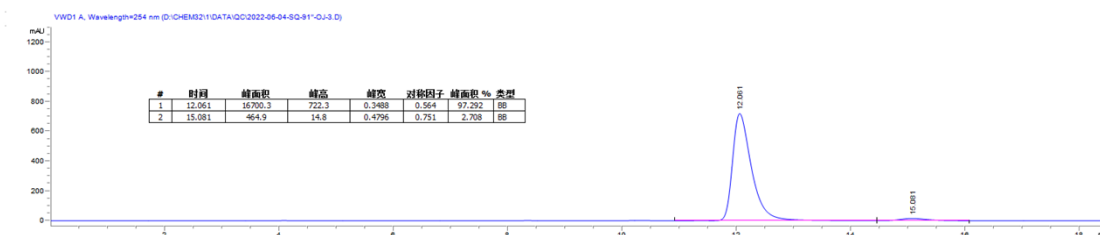

**(*S, E*)-2-(((1,3-diphenylallyl)oxy)methyl)naphthalene (10j).**<sup>[14]</sup> Colorless oil was

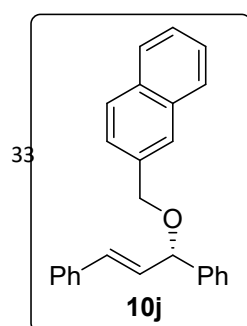

obtained in 93% yield. 95% ee was determined by chiral HPLC (Chiralpak OD-H, *n*-hexane/*i*-PrOH = 98/2, 0.8 mL/min, 254 nm,

25 °C):  $t_R$  (major) = 10.9 min,  $t_R$  (minor) = 19.1 min.  $^1\text{H NMR}$  (400 MHz,  $\text{CDCl}_3$ )  $\delta$  7.91-7.82 (m, 4H), 7.57-7.47 (m, 5H), 7.46-7.39 (m, 4H), 7.38-7.31 (m, 3H), 7.29-7.24 (m, 1H), 6.69 (d,  $J$  = 15.9 Hz, 1H), 6.42 (dd,  $J$  = 15.8, 7.0 Hz, 1H), 5.10 (d,  $J$  = 7.0 Hz, 1H), 4.78 (s, 2H).

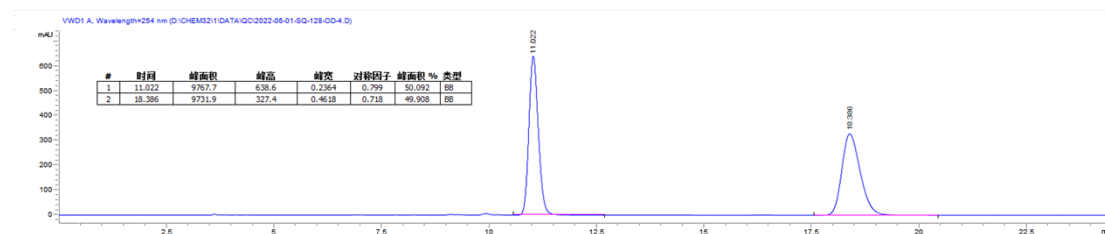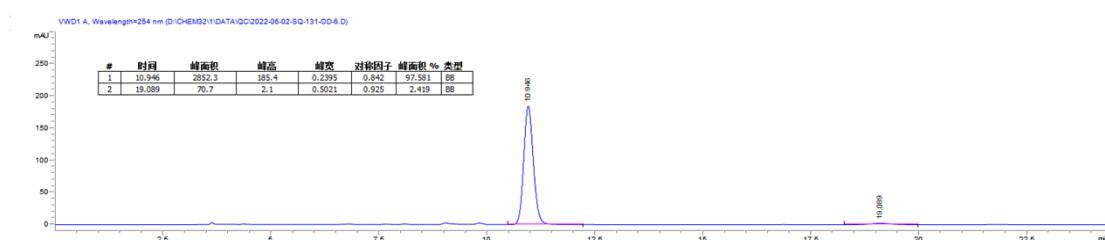

**(S,E)-2-(((1,3-Diphenylallyl)oxy)methyl)furan (10k).**<sup>[1]</sup> Colorless oil was obtained in

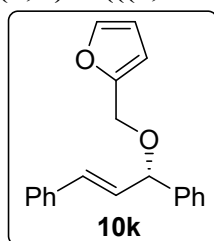

92% yield. 94% ee was determined by chiral HPLC (Chiralpak OJ-H, *n*-hexane/*i*-PrOH = 90/10, 1 mL/min, 254 nm, 25 °C):  $t_R$  (major) = 10.0min,  $t_R$  (minor) = 11.0 min.  $^1\text{H NMR}$  (400 MHz,  $\text{CDCl}_3$ )  $\delta$  7.51-7.43 (m, 3H), 7.43-7.36 (m, 4H), 7.36-7.29 (m, 3H), 7.28-7.24 (m, 1H), 6.65 (d,  $J$  = 15.9 Hz, 1H), 6.47-6.26 (m, 3H), 5.06 (d,  $J$  = 7.0 Hz, 1H), 4.54 (s, 2H).

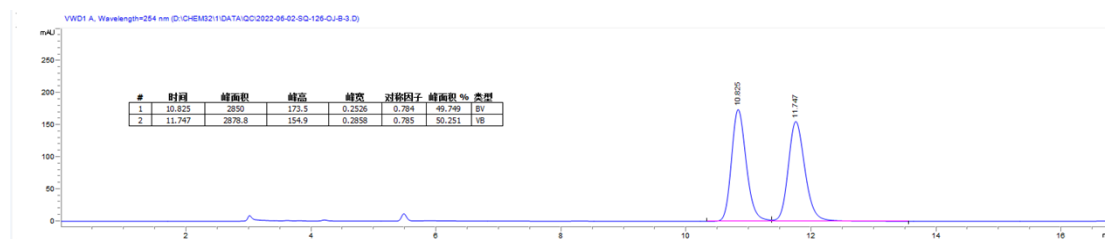

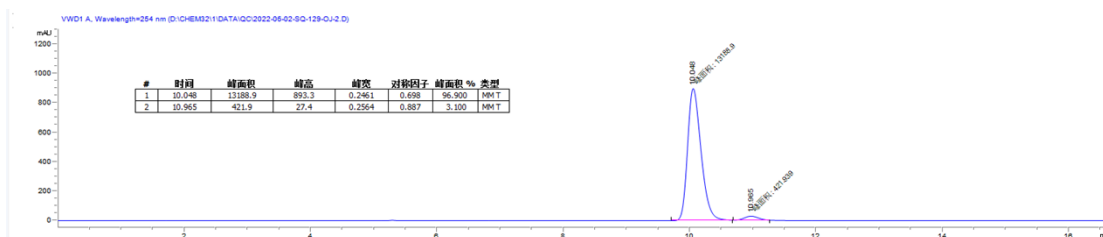

**(S, E)-2-(((1,3-diphenylallyl)oxy)methyl)pyridine (10I).**<sup>[1]</sup> Colorless oil was obtained

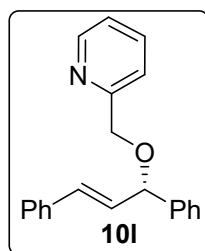

in 66% yield. 94% ee was determined by chiral HPLC (Chiralpak OJ-H, *n*-hexane/*i*-PrOH = 95/5, 1 mL/min, 254 nm, 40 °C):  $t_R$  (major) = 14.6 min,  $t_R$  (minor) = 16.3 min. <sup>1</sup>H NMR (400 MHz, CDCl<sub>3</sub>)  $\delta$  8.56 (d,  $J$  = 4.9 Hz, 1H), 7.74 (t,  $J$  = 7.7 Hz, 1H), 7.67 – 7.54 (m, 1H), 7.53–7.44 (m, 2H), 7.43–7.35 (m, 4H), 7.35–7.27 (m, 3H), 7.26–7.17

(m, 2H), 6.70 (d,  $J$  = 15.9 Hz, 1H), 6.37 (dd,  $J$  = 15.9, 7.1 Hz, 1H), 5.11 (d,  $J$  = 7.1 Hz, 1H), 4.75 (q,  $J$  = 13.6 Hz, 2H).

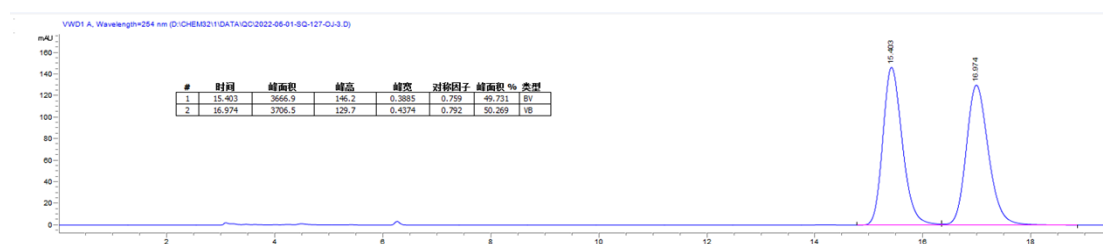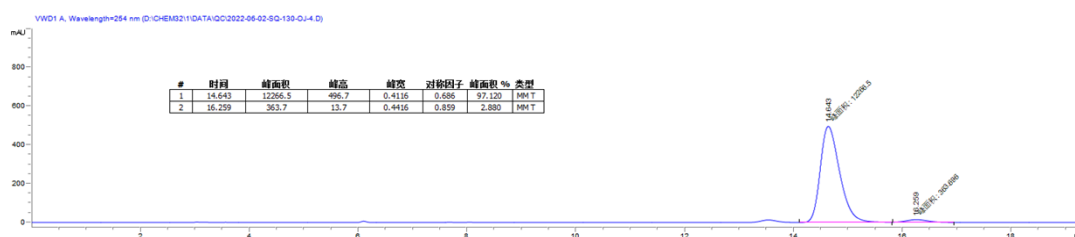

## Synthetic Application of Asymmetric Allylic Amination Product 8a <sup>[15]</sup>

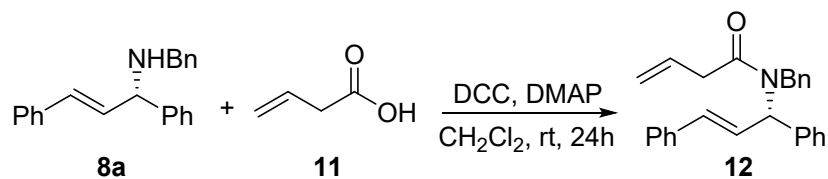

To an oven-dried reaction flash was added asymmetric allylic amination product **8a** (134 mg, 0.44 mmol), 3-butenoic **11** (38.5 mg, 0.44 mmol), DCC (90.8 mg, 0.44 mmol), DMAP (10.8 mg, 0.088 mmol) and CH<sub>2</sub>Cl<sub>2</sub> (5 mL). The reaction mixture was stirred for 24h at room temperature. The reaction mixture was filtered and the filtration was concentrated under vacuum to give the crude product, which was further purified by column chromatography to afford the desired product **12** as colorless oil in 88% yield. 90% ee was determined by chiral HPLC (Chiralpak AD-H, *n*-hexane/*i*-PrOH = 90/10, 0.8 mL/min, 254 nm, 40 °C): *t<sub>R</sub>* (minor) = 12.2 min, *t<sub>R</sub>* (major) = 17.7 min. <sup>1</sup>H NMR (400 MHz, CDCl<sub>3</sub>) δ 7.41-7.32 (m, 4H), 7.32-7.24 (m, 6H), 7.24-7.18 (m, 3H), 7.17-7.10 (m, 2H), 6.76-6.66 (m, 1H), 6.65-6.33 (m, 1H), 6.33-6.10 (m, 1H), 6.10-5.77 (m, 1H), 5.32-5.03 (m, 2H), 5.00-4.64 (m, 1H), 4.61-4.27 (m, 1H), 3.51-2.99 (m, 2H).

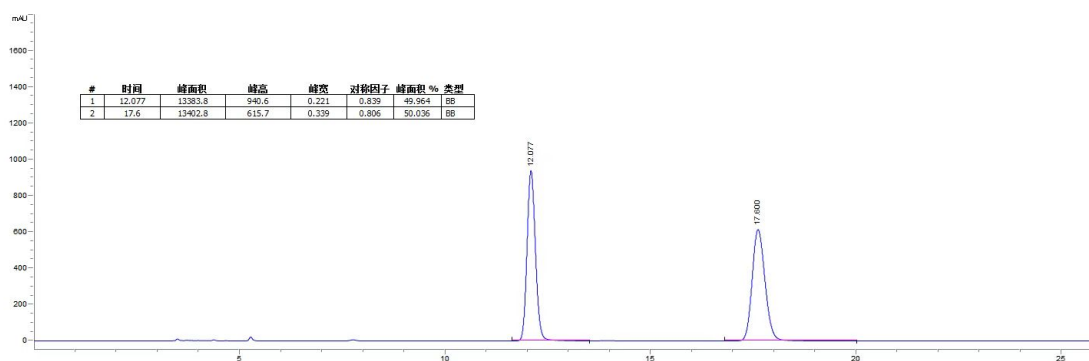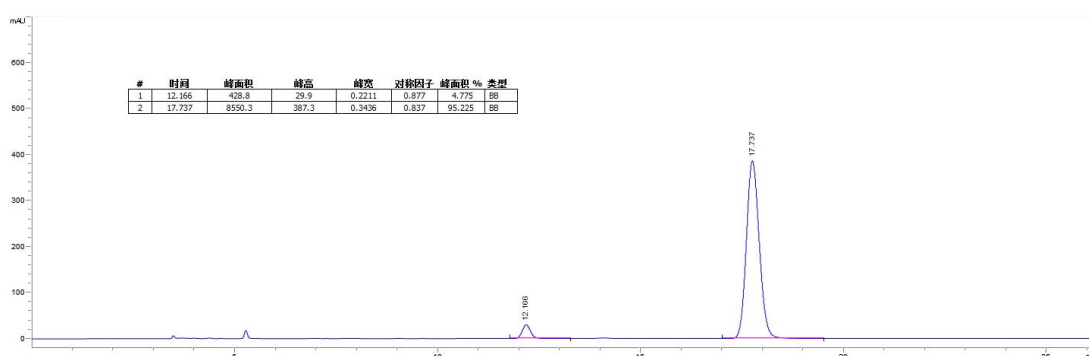

## References

- [1] Liu, Q.-L.; Chen, W.; Jiang, Q.-Y.; Bai, X.-F.; Li, Z.; Xu, Z.; Xu, L.-W. *ChemCatChem* **2016**, *8*, 1495–1499.
- [2] Biosca, M.; Saltó, J.; Magre, M.; Norrby, P.-O.; Pàmies, O.; Diéguez, M. *ACS Catal.* **2019**, *9*, 6033–6048.
- [3] Jayakumar, S.; Prakash, M.; Balaraman, K.; Kesavan, V. *Eur. J. Org. Chem.* **2014**, *2014*, 606-615.
- [4] Balaraman, K.; Vasanthan, R.; Kesavan, V. *Tetrahedron* **2013**, *69*, 6162-6169.
- [5] Majdecki, M.; Jurczak, J.; Bauer, T. *ChemCatChem* **2015**, *7*, 799-807.
- [6] Martínez-Gualda, A. M.; Cano, R.; Marzo, L.; Pérez-Ruiz, R.; Luis-Barrera, J.; Mas-Ballesté, R.; Fraile, A.; de la Peña O’Shea, V. A.; Alemán, J. *Nat. Commun.* **2019**, *10*, 2634.
- [7] Nemoto, T.; Tamura, S.; Sakamoto, T.; Hamada, Y. *Tetrahedron: Asymmetry* **2008**, *19*, 1751–1759.
- [8] Mino, T.; Watanabe, K.; Akiyama, T.; Mizutani, Y.; Miura, K.; Hashimoto, M.; Yoshida, Y.; Sakamoto, M. *Tetrahedron* **2018**, *74*, 3871–3878.
- [9] Wu, Y.; Kwong, F. Y.; Li, P.; Chan, A. S. *Synlett* **2013**, *24*, 2009–2013.
- [10] Wang, Z.; Mo, H.; Cheng, D.; Bao, W. *Org. Biomol. Chem.* **2012**, *10*, 4249–4255.
- [11] Chen, K.; Li, Y.; Pullarkat, S. A.; Leung, P.-H. *Adv. Synth. Catal.* *2012*, *354*, 83-

- [12] Lam, F. L.; Au-Yeung, T. T.-L.; Kwong, F. Y.; Zhou, Z.; Wong, K. Y.; Chan, A. S. C. *Angew. Chem. Int. Ed.* **2008**, *47*, 1280–1283.
- [13] Xing, J.; Cao, P.; Liao, J. *Tetrahedron: Asymmetry* **2012**, *23*, 527–535.
- [14] Qiu, Z.; Sun, R.; Yang, K.; Teng, D. *Molecules* **2019**, *24*, 1575.
- [15] Takahashi, K.; Nakano, H.; Fujita, R. *Tetrahedron Lett.* **2005**, *46*, 8927-8930.

# Copies of $^1\text{H}$ , $^{13}\text{C}$ and $^{31}\text{P}$ NMR Spectra

8.93  
8.92  
8.02  
8.01  
8.01  
8.00  
8.00  
7.99  
7.99  
7.39  
7.37  
7.35  
7.34  
7.34  
7.33  
7.33  
7.31  
7.31  
7.30  
7.29  
7.28  
7.28  
7.27  
7.27  
7.26  
7.25  
7.24  
7.23  
7.21  
7.21  
7.20  
7.20  
7.19  
7.18  
6.87  
6.87  
6.86  
6.86  
6.85  
6.84  
6.84  
4.42  
4.41  
4.39  
4.37  
1.35  
1.33

WDQ-61

PROTON CDC13 (D:\NMR400\02T2) nmr 59

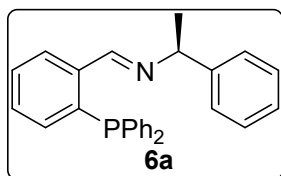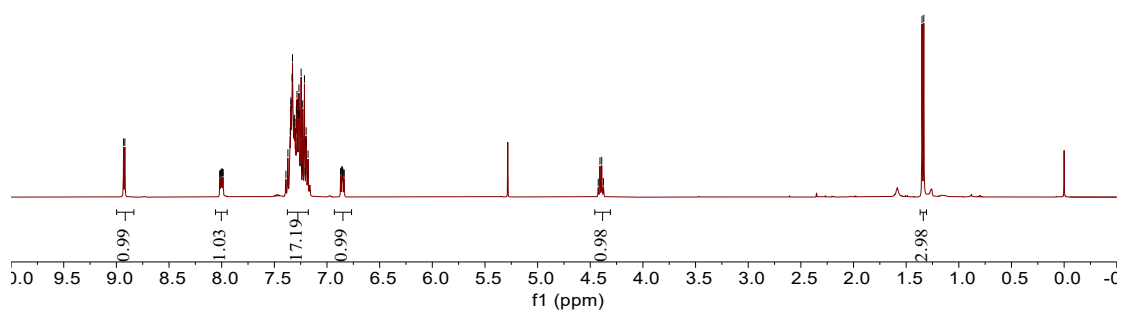

$^1\text{H}$  NMR of **6a**

--13.08

WDQ-61

P31CPD CDC13 (D:\NMR400\02T2) nmr 59

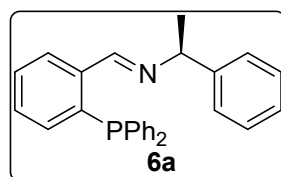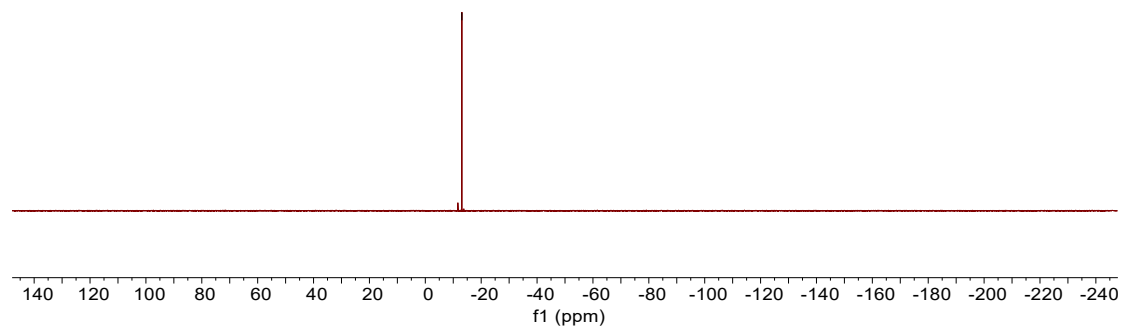

$^{31}\text{P}$  NMR of **6a**

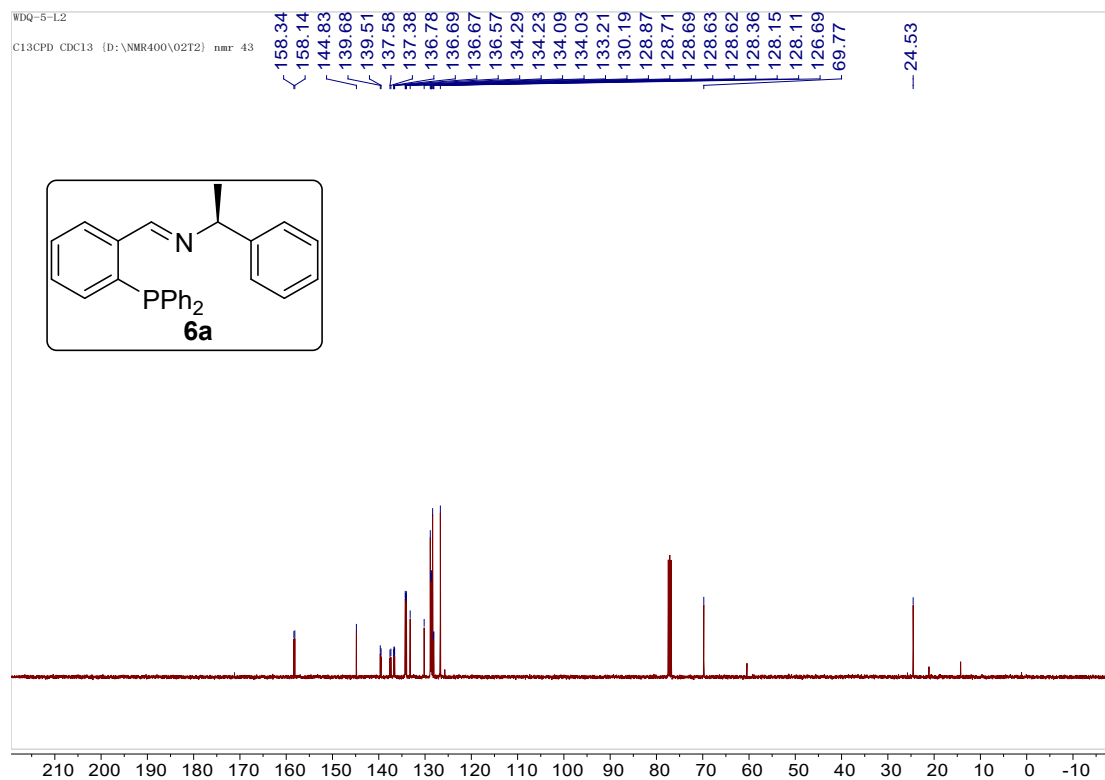

<sup>13</sup>C NMR of **6a**

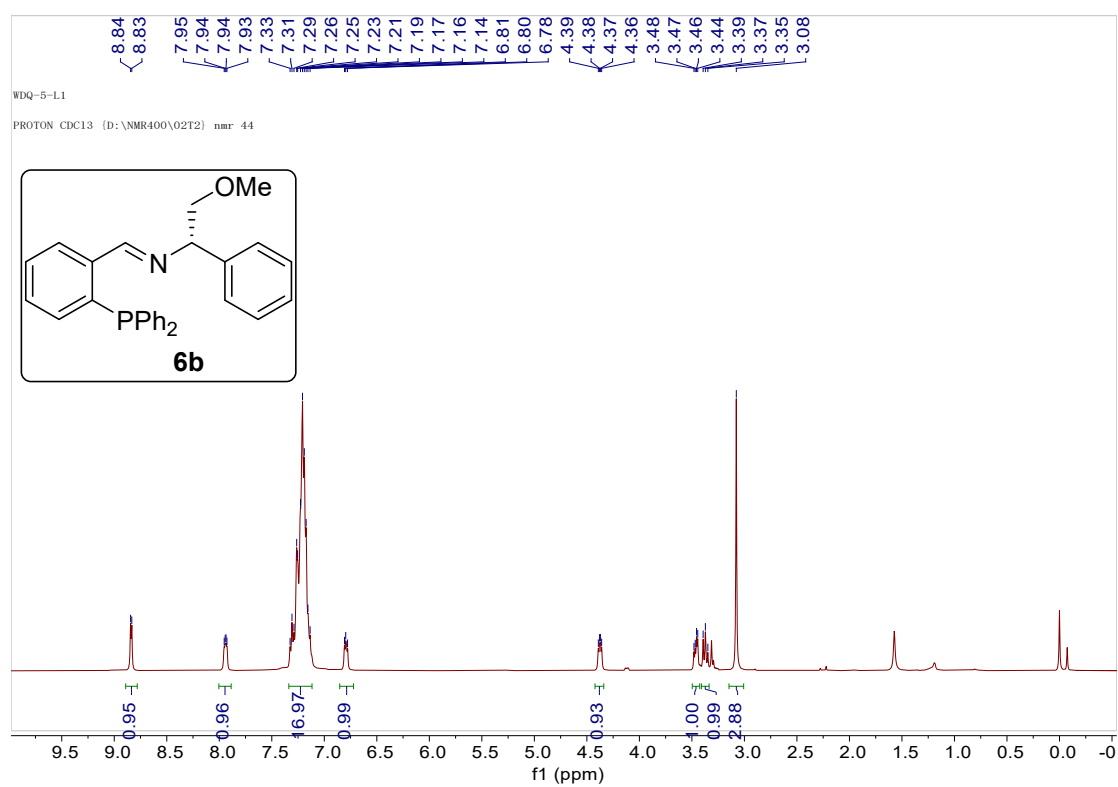

<sup>1</sup>H NMR of **6b**



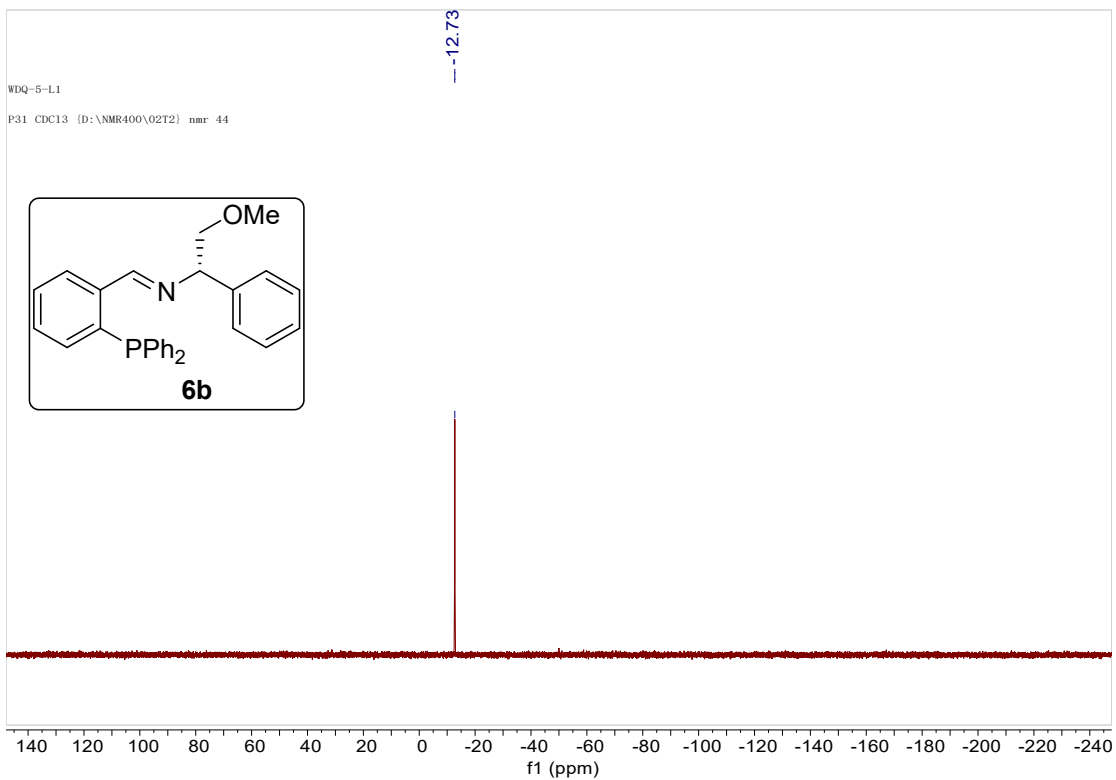

<sup>31</sup>P NMR of **6b**

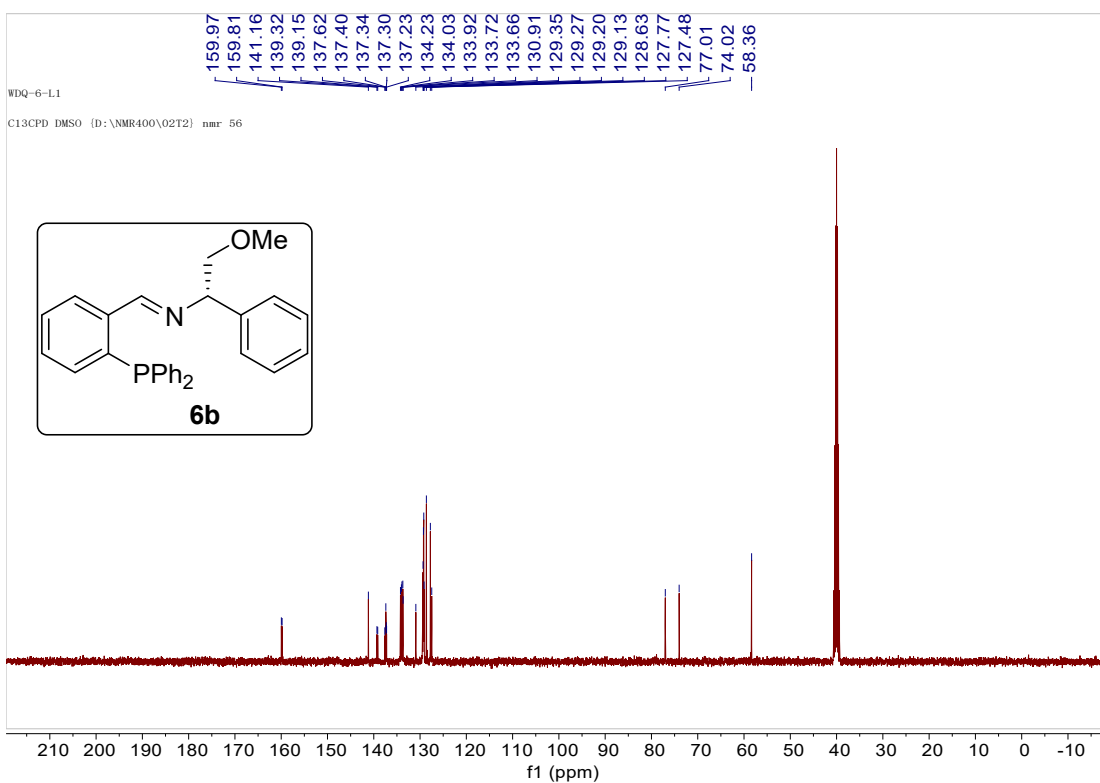

<sup>13</sup>C NMR of **6b**

7.62  
7.61  
7.61  
7.60  
7.39  
7.37  
7.37  
7.36  
7.35  
7.32  
7.32  
7.31  
7.30  
7.30  
7.27  
7.27  
7.26  
7.26  
7.25  
7.22  
7.21  
7.20  
7.19  
7.18  
7.18  
7.17  
7.16  
7.16  
7.15  
7.13  
7.11  
7.11  
7.09  
6.96  
6.95  
6.95  
6.94  
6.94  
6.94  
4.54  
4.53  
4.51  
3.49  
3.47  
3.47  
1.15  
1.12  
1.11

HCJ-20230420 (a) /H  
20230420-CDC13-a

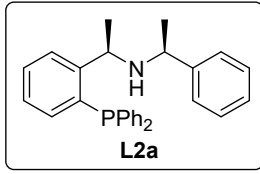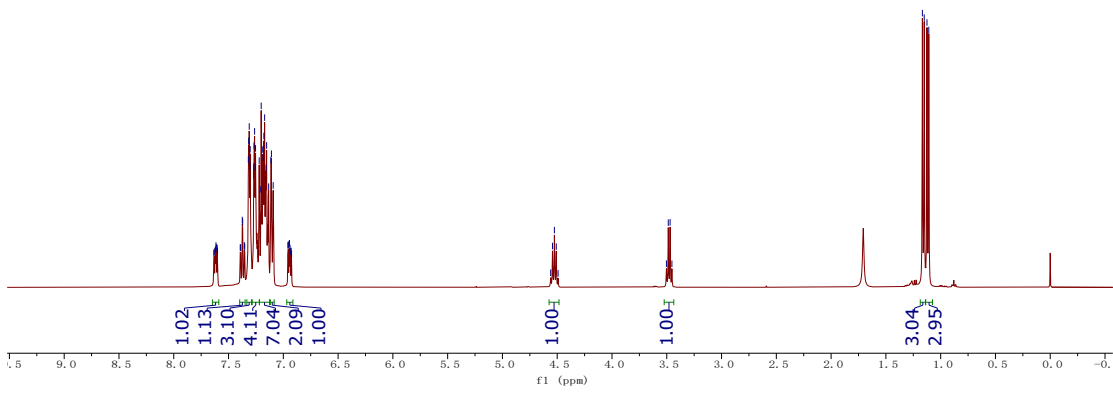

<sup>1</sup>H NMR of L2a

WDQ-3-La

P31 CDC13 (D:\NMR400\02T2) nmr 4

--19.19

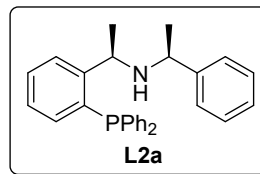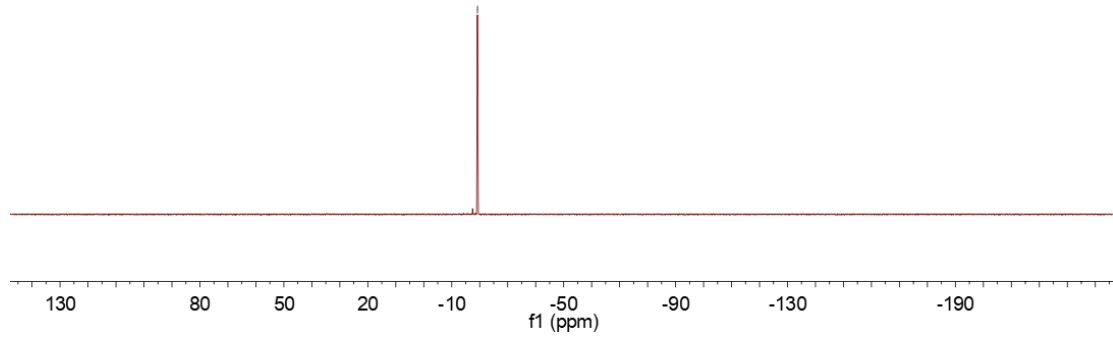

<sup>31</sup>P NMR of L2a

151.34  
 151.11  
 146.23  
 137.71  
 137.59  
 137.43  
 137.32  
 135.03  
 134.89  
 134.56  
 134.54  
 134.02  
 133.87  
 133.82  
 133.67  
 129.57  
 128.60  
 128.58  
 128.55  
 128.53  
 128.48  
 128.42  
 126.87  
 126.74  
 126.67  
 126.45  
 126.40  
 55.84  
 53.38  
 53.14  
 24.82  
 24.80  
 24.73

HCJ-20230420(a)  
 20230420-CDC13-a

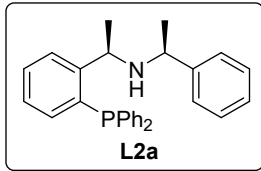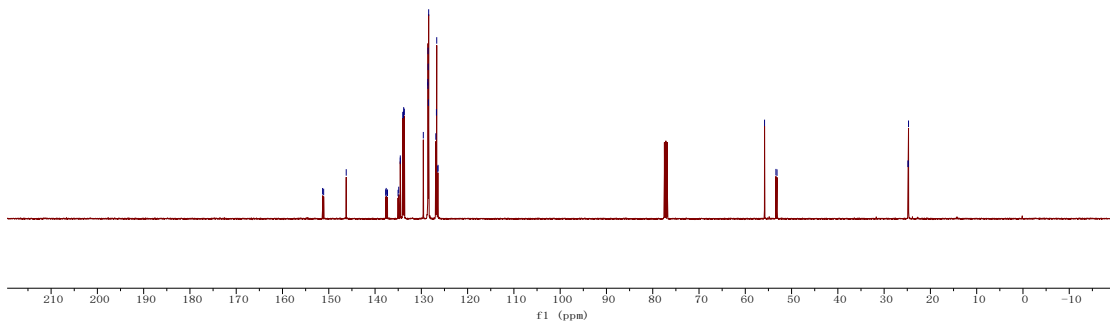

<sup>13</sup>C NMR of L2a

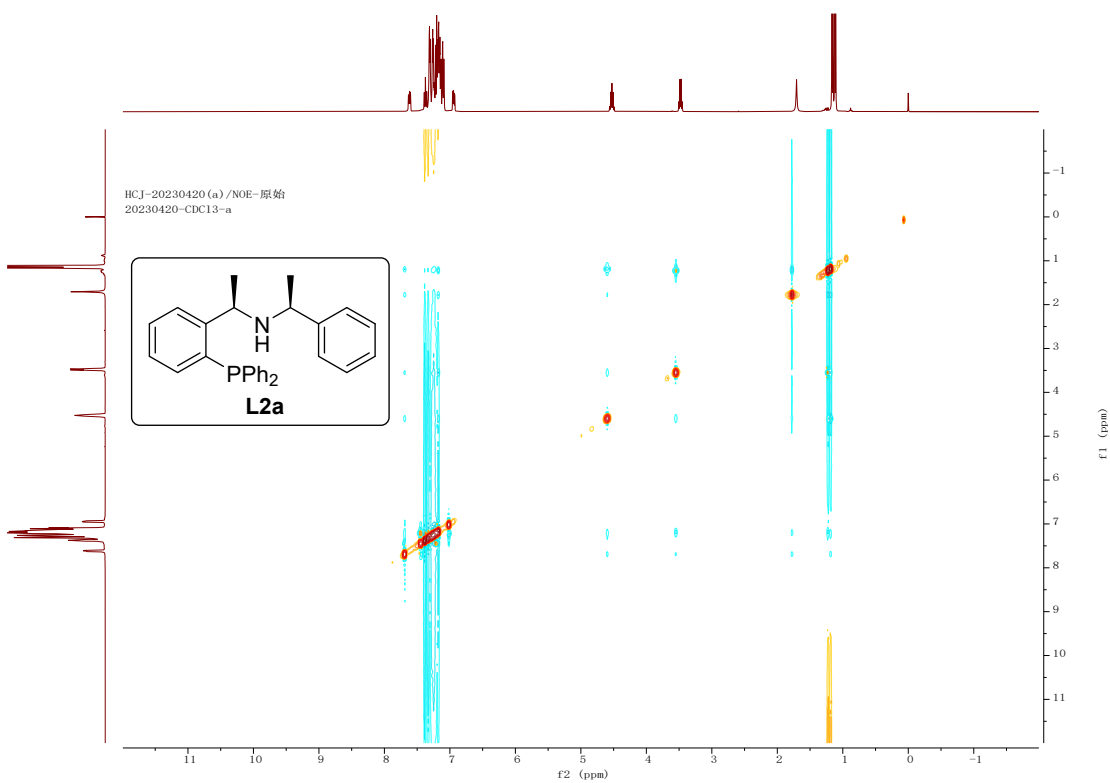

NOESY of L2a

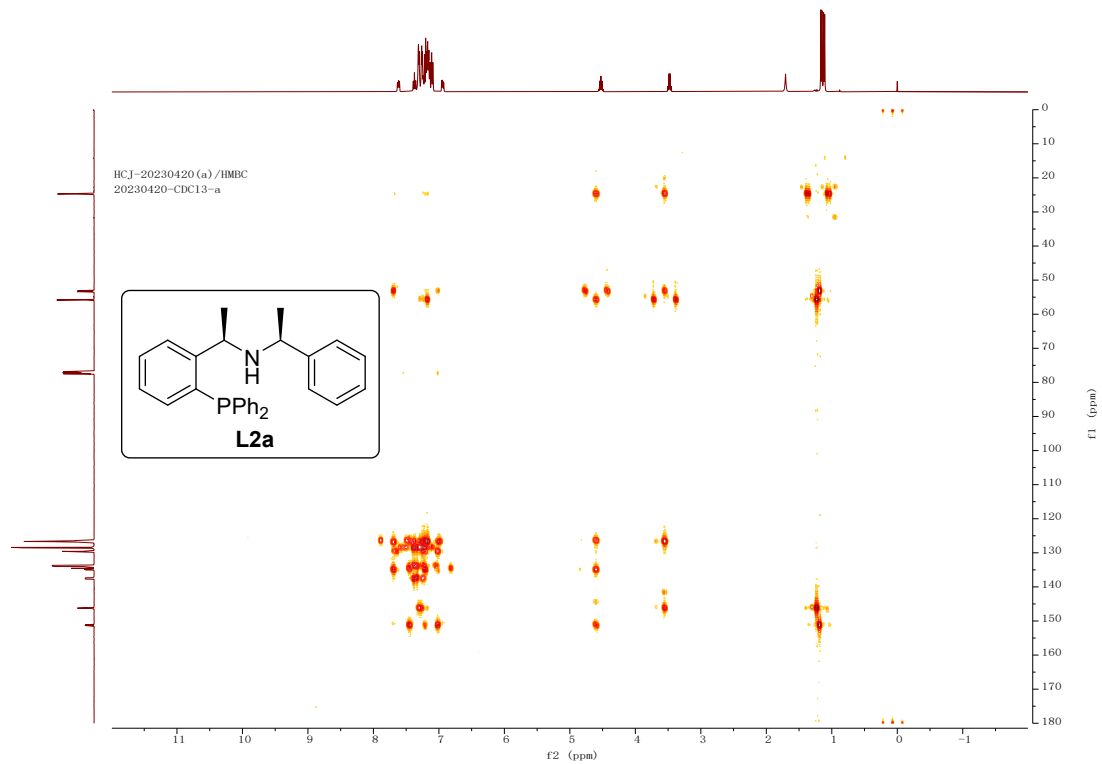

HMBC of L2a

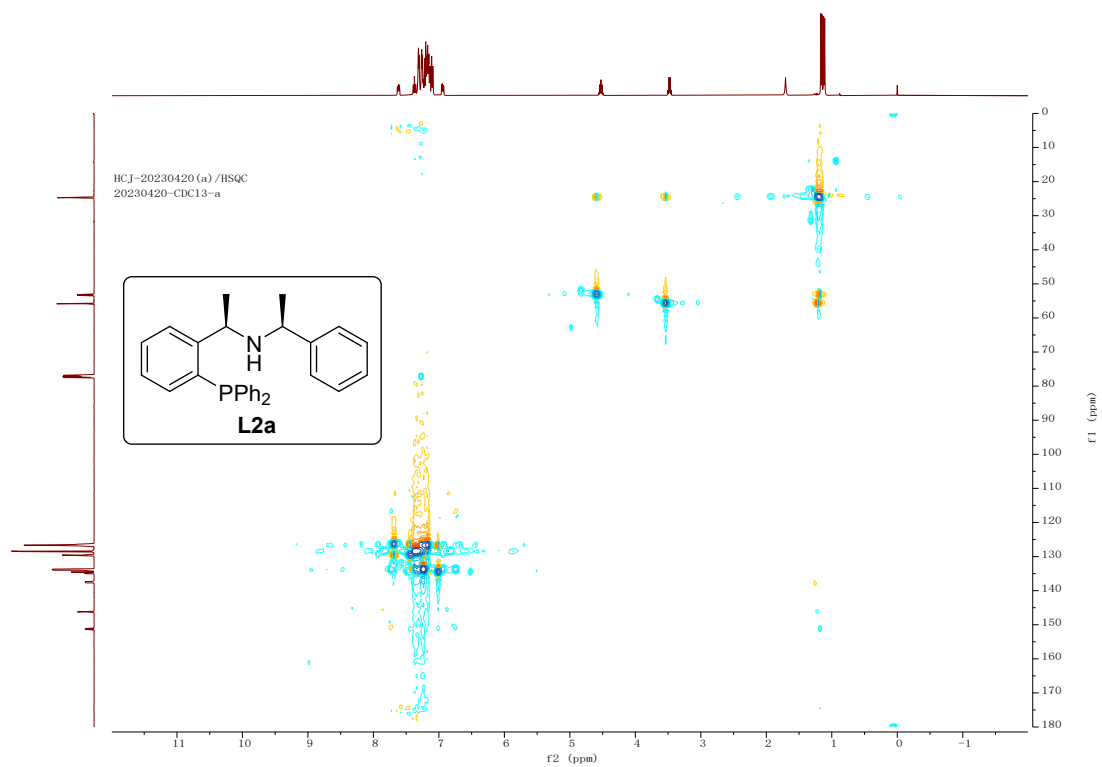

HSQC of L2a

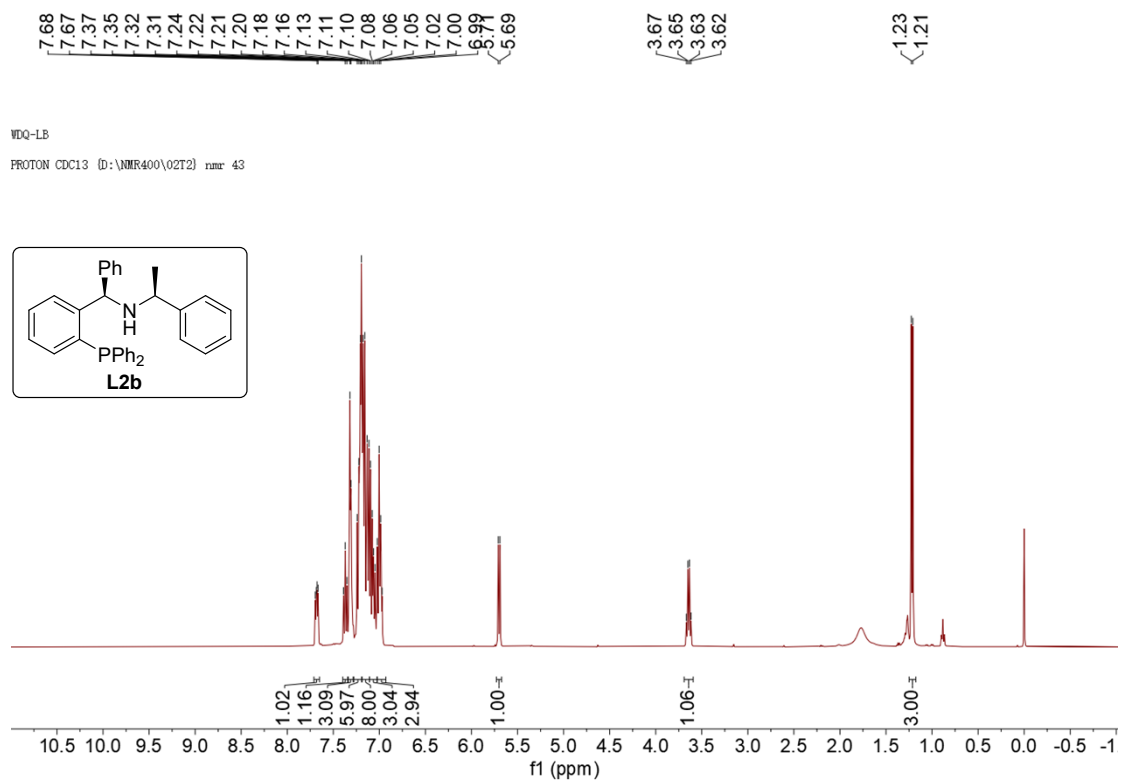

<sup>1</sup>H NMR of L2b

--18.79

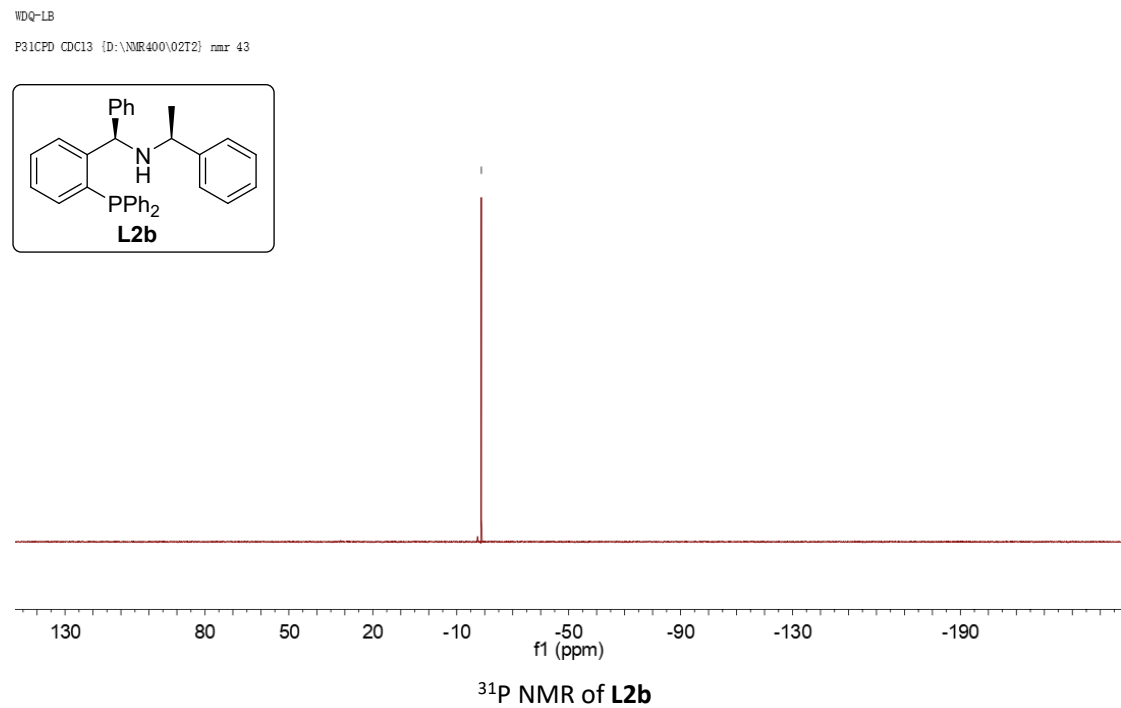

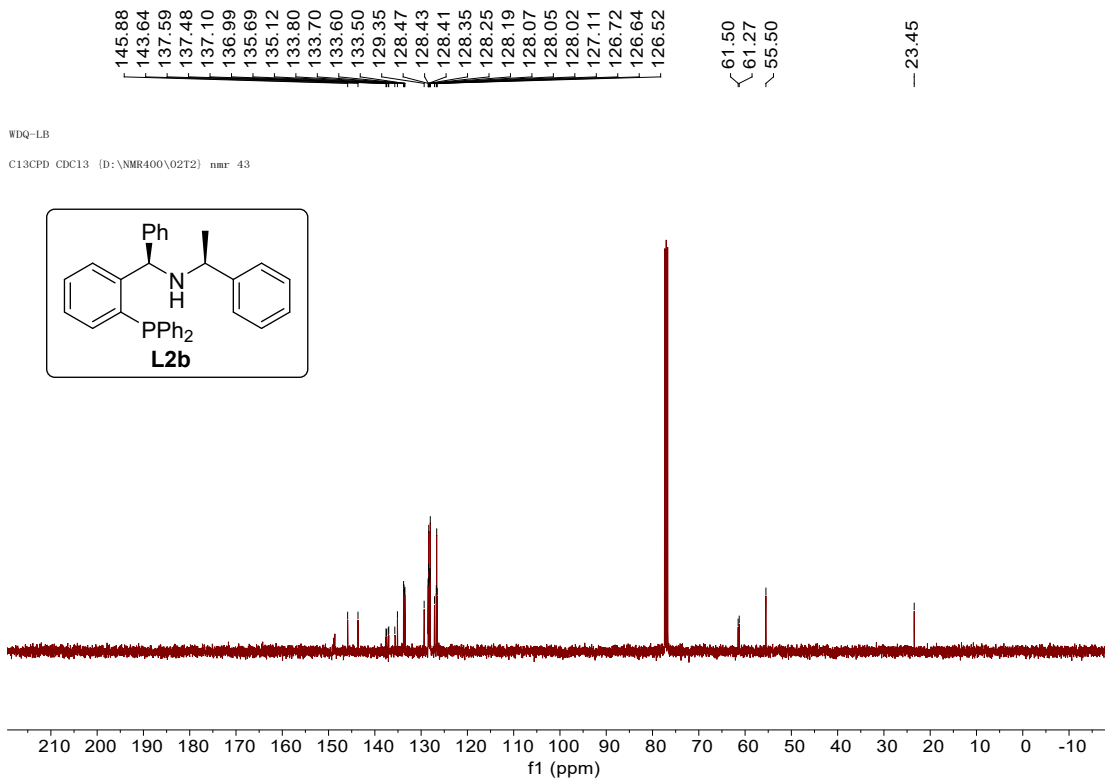

<sup>13</sup>C NMR of L2b

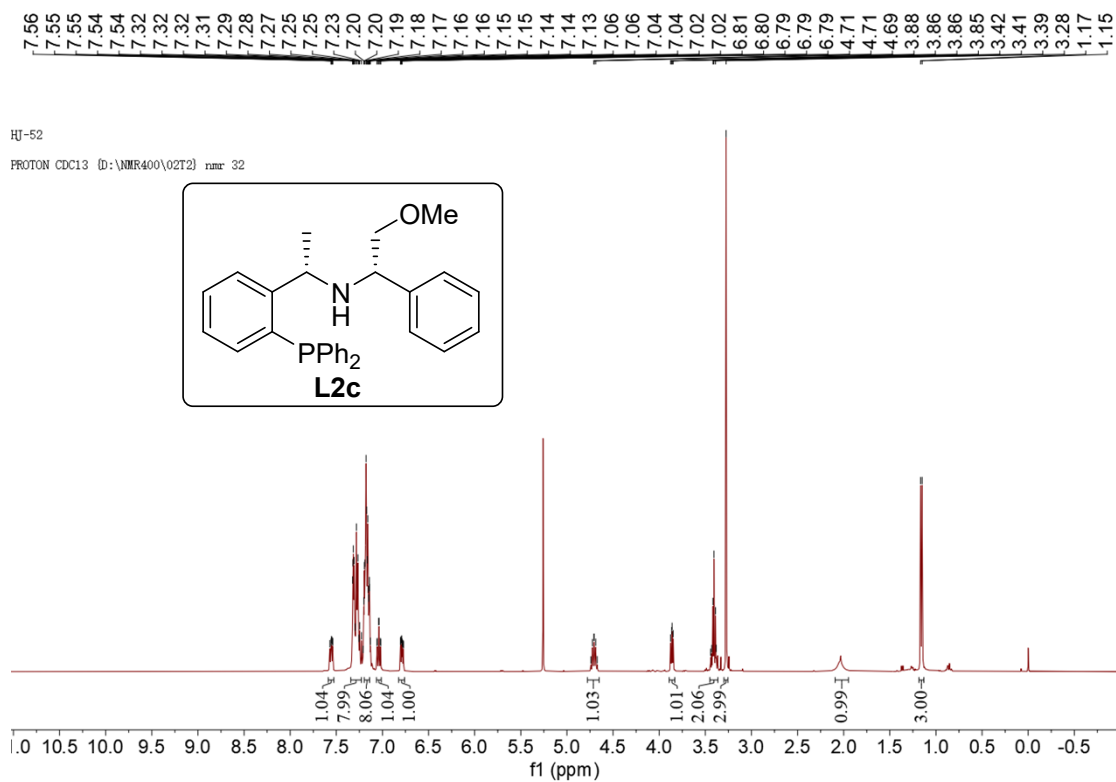

<sup>1</sup>H NMR of L2c

F31CFD CDC13 [D:\NMR400\02T2] nmr 32

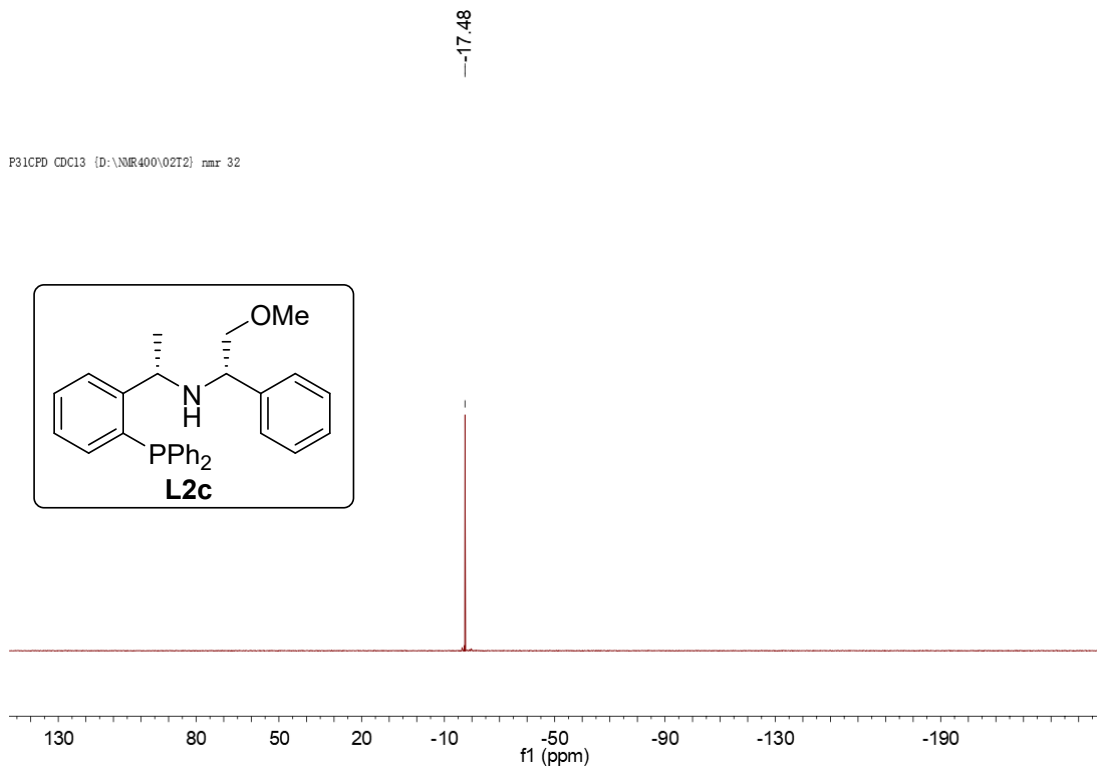

<sup>31</sup>P NMR of L2c

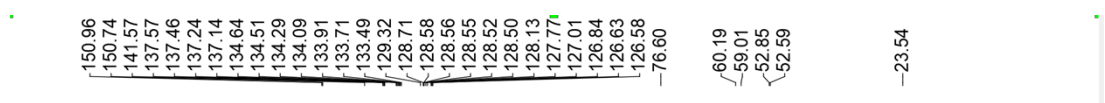

IJ-52

C13CFD CDC13 [D:\NMR400\02T2] nmr 32

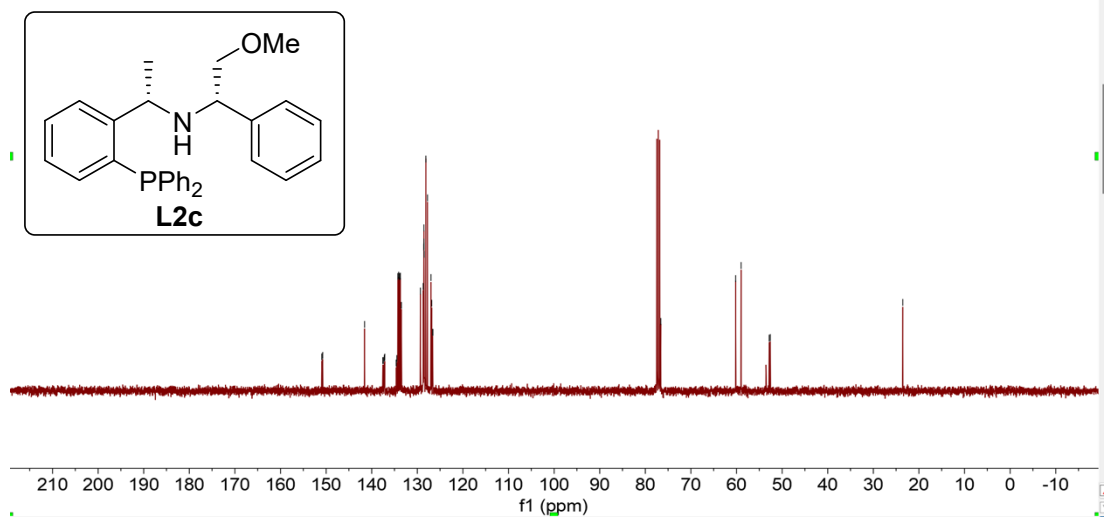

<sup>13</sup>C NMR of L2c

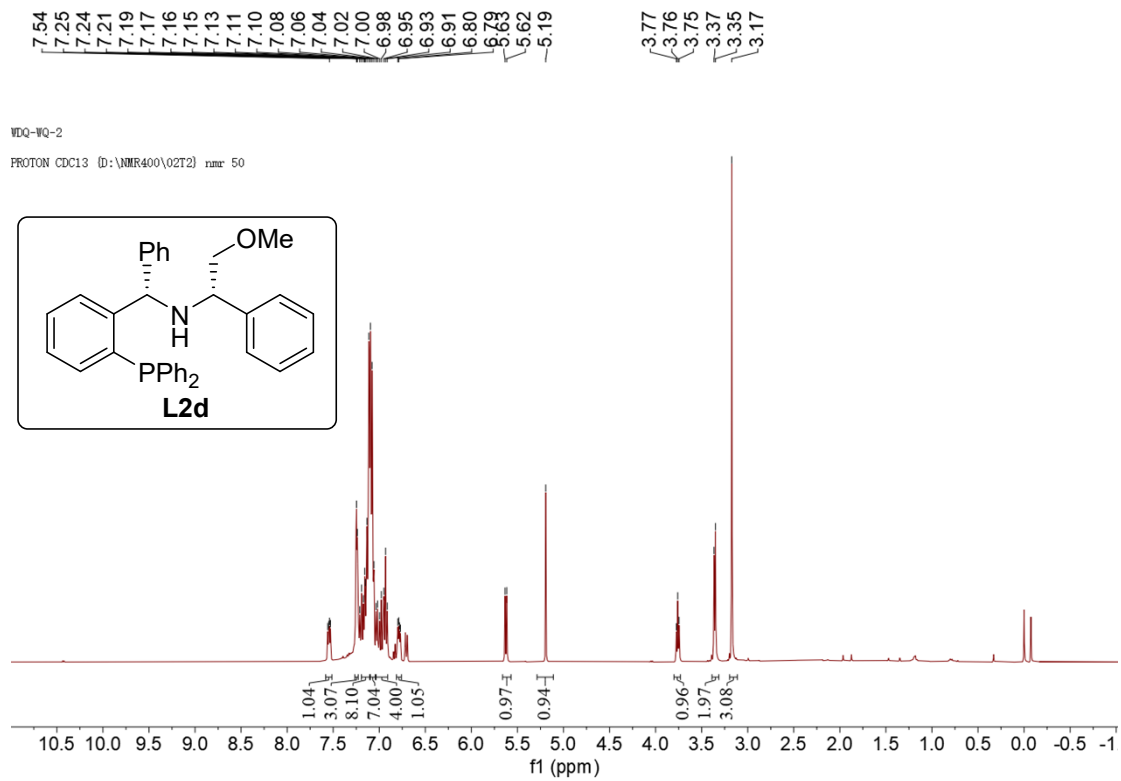

<sup>1</sup>H NMR of L2d

--17.33

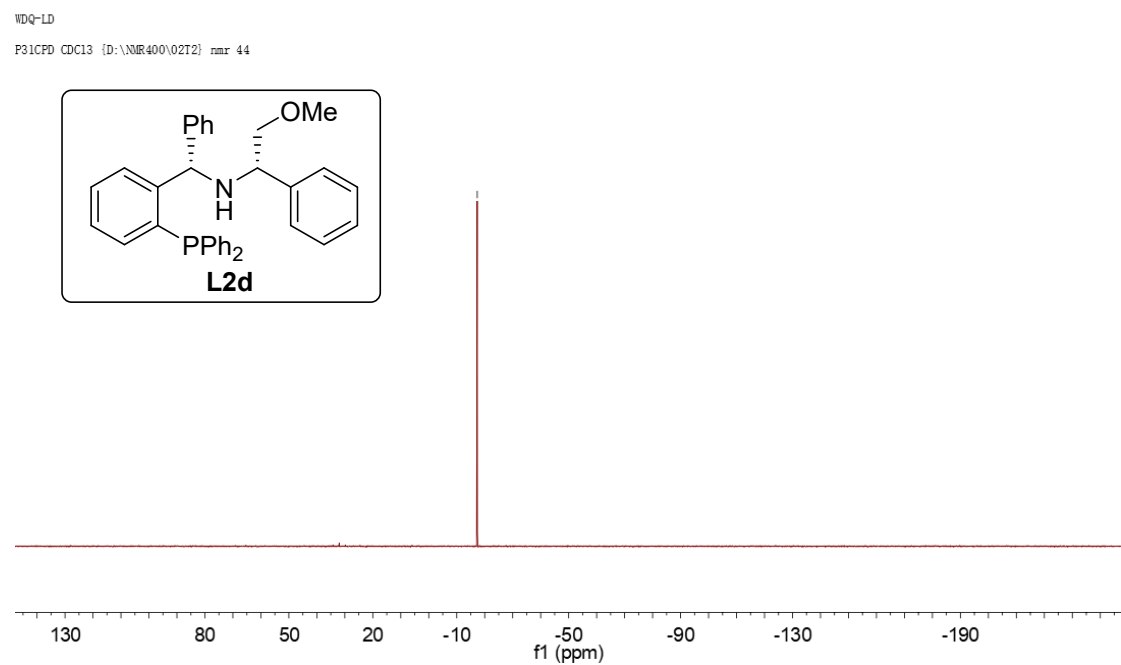

<sup>31</sup>P NMR of L2d



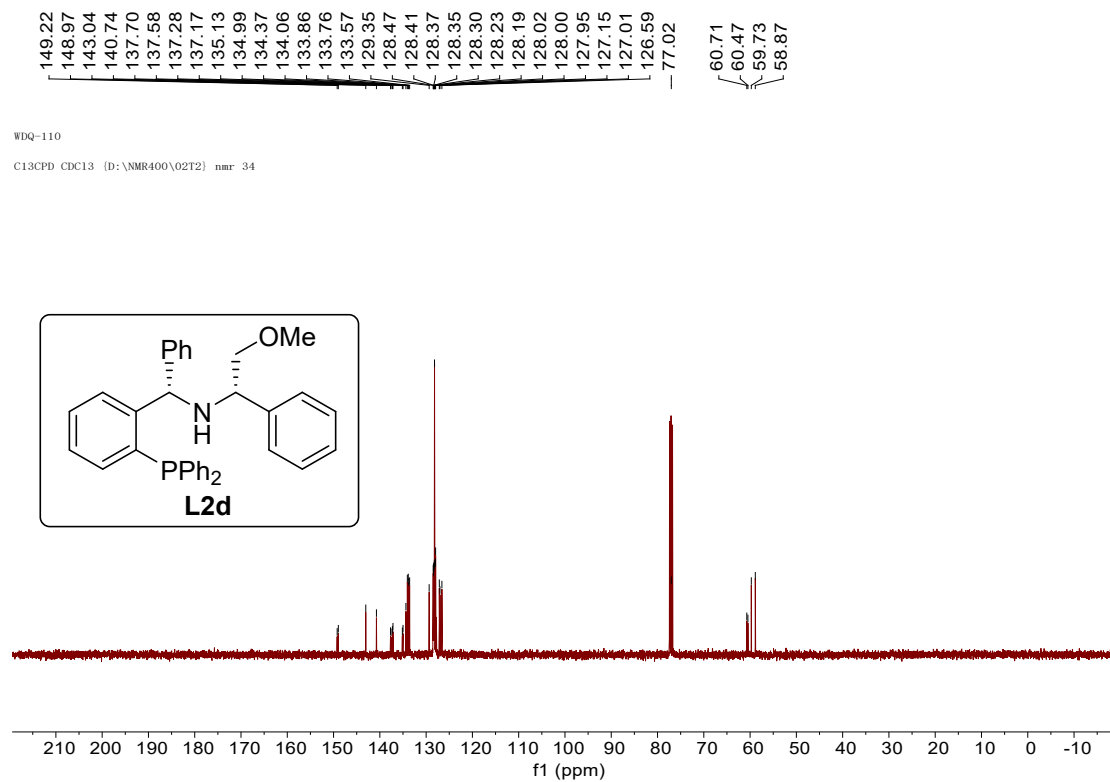

<sup>13</sup>C NMR of L2d

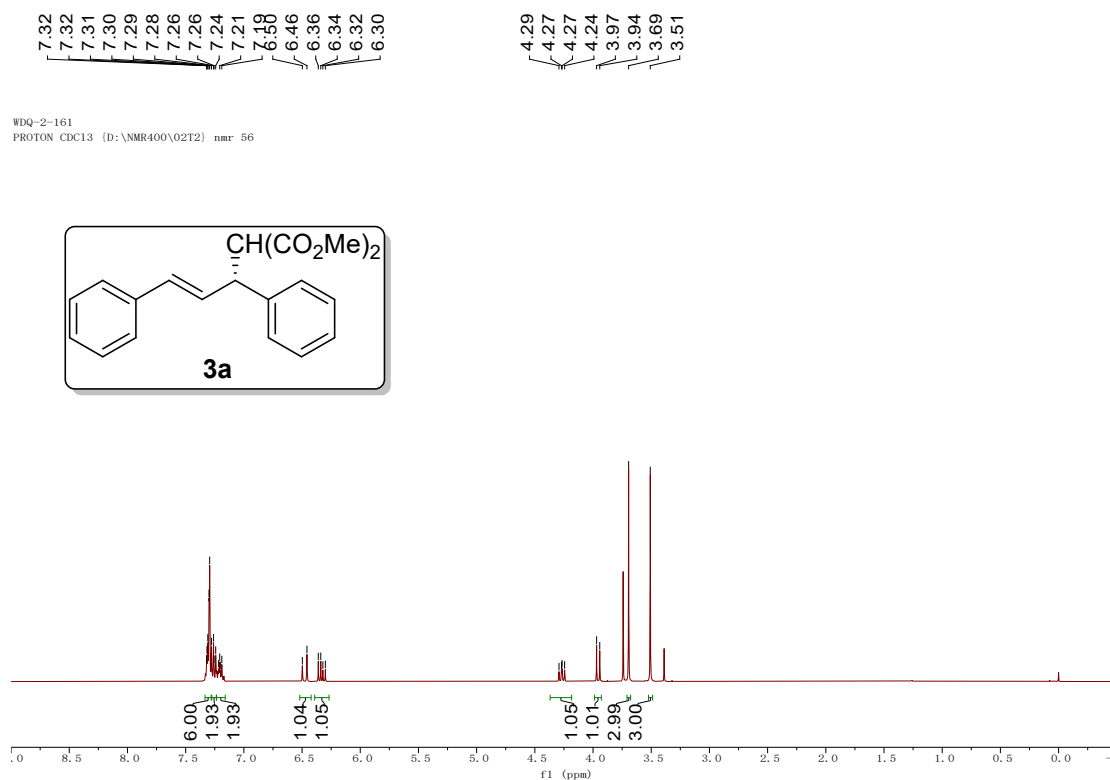

<sup>1</sup>H NMR of 3a

7.29  
7.21  
7.18  
7.16  
7.15  
7.13  
7.11  
7.10  
7.09  
6.87  
6.63  
6.04  
6.02  
6.01  
5.98

4.59  
4.56  
4.56  
4.54  
4.08  
4.05  
3.73  
3.51

2.47  
2.27

168-13.10.fid  
PROTON CDC13 (D:\NMR400\02T2) nmr 50

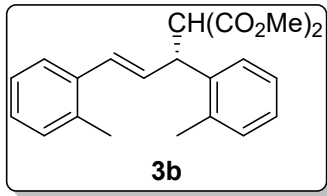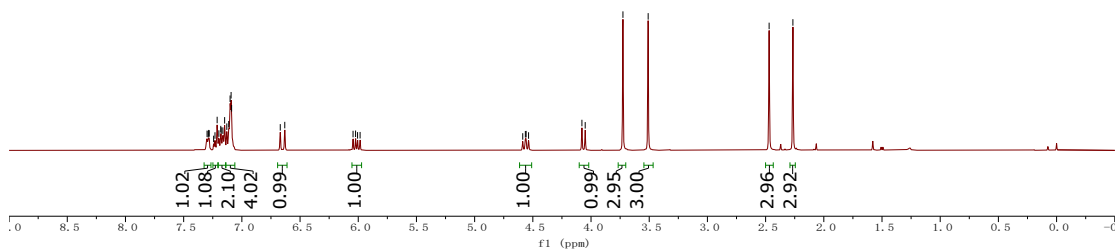

<sup>1</sup>H NMR of **3b**

7.46  
7.43  
7.39  
7.37  
7.35  
7.33  
7.23  
7.21  
7.19  
7.16  
7.15  
6.39  
6.32  
6.30  
6.28  
6.26

4.25  
4.23  
4.20  
3.92  
3.71  
3.57

168-11.10.fid  
PROTON CDC13 (D:\NMR400\02T2) nmr 34

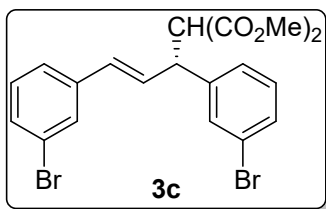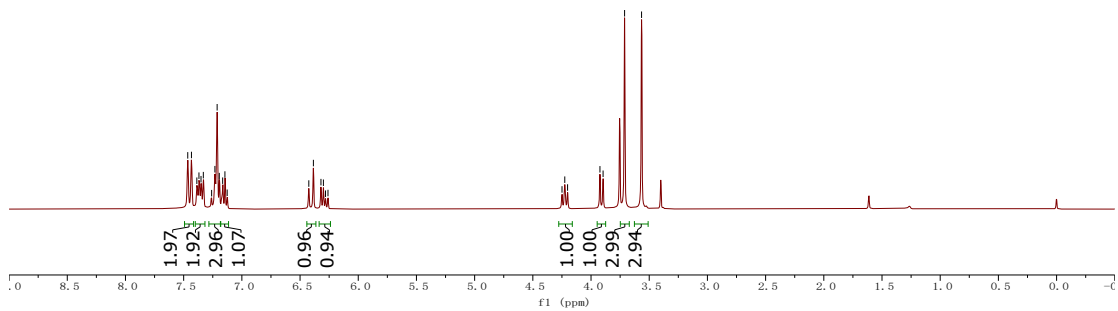

<sup>1</sup>H NMR of **3c**

WDQ-3-168-5.10.fid  
PROTON CDC13 (D:\NMR400\506) nmr 32

7.13  
7.11  
7.11  
7.09  
7.04  
7.02  
7.00  
6.98  
6.37  
6.33  
6.21  
6.19  
6.17  
6.15

4.16  
4.14  
4.13  
4.11  
3.86  
3.83  
3.61  
3.45

- 2.23

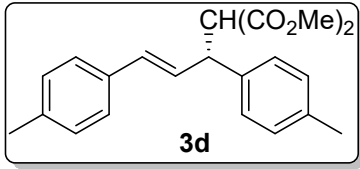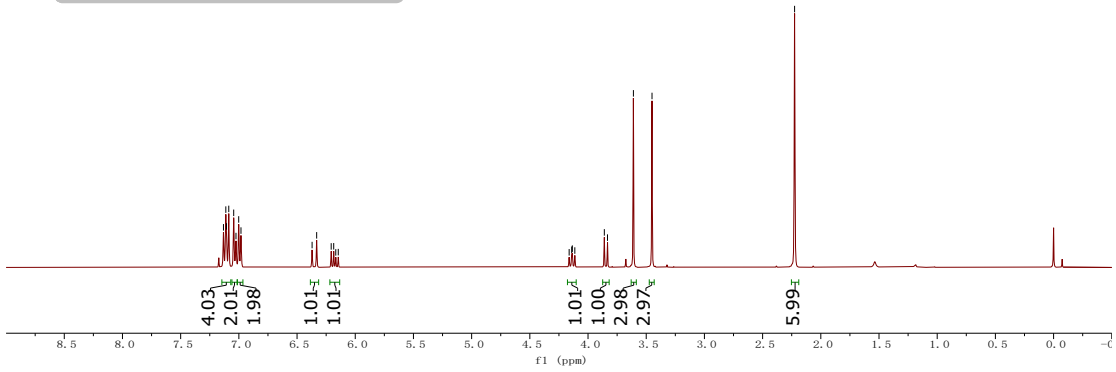

<sup>1</sup>H NMR of **3d**

WDQ-168-2.10.Fid  
PROTON CDC13 (D:\NMR400\02T2) nmr 57

7.25  
7.23  
7.21  
7.19  
6.85  
6.83  
6.81  
6.79  
6.41  
6.37  
6.20  
6.17  
6.16  
6.13

4.22  
4.20  
4.19  
4.17  
3.90  
3.87  
3.78  
3.77  
3.69  
3.52

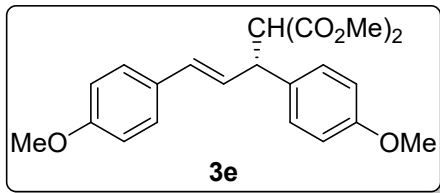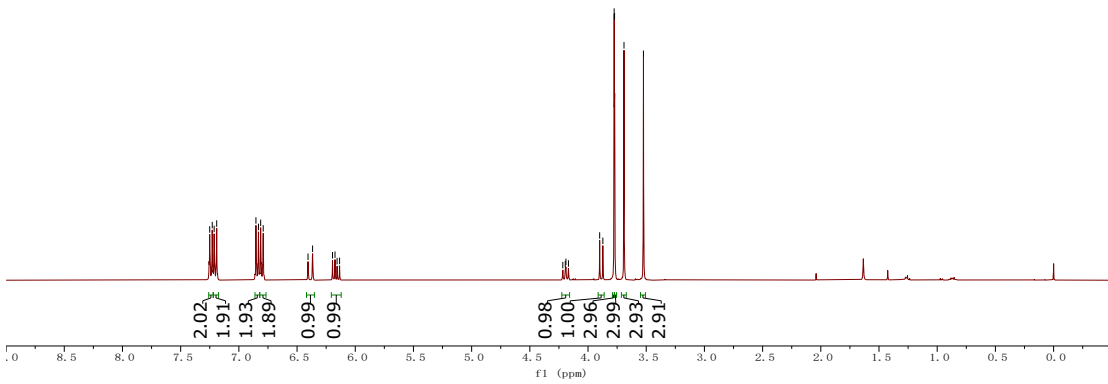

<sup>1</sup>H NMR of **3e**

WDQ-3-168-3.10.fid  
PROTON CDC13 (D:\NMR400\02T2) nmr 30

7.38  
7.36  
7.33  
7.30  
7.10  
7.08  
6.33  
6.29  
6.23  
6.21  
6.19  
6.17

4.17  
4.15  
4.14  
4.12  
3.83  
3.80  
3.62  
3.47

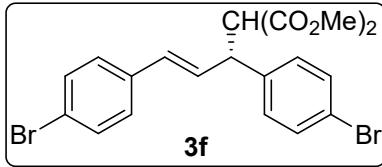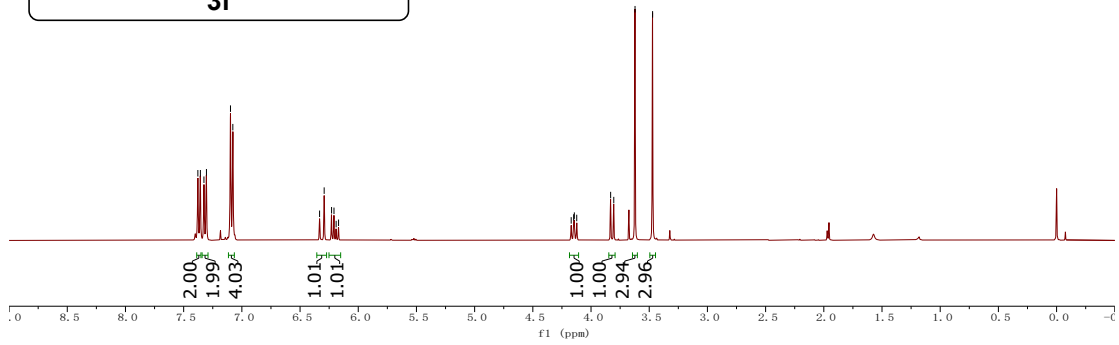

<sup>1</sup>H NMR of **3f**

WDQ-168-6.10.Fid  
PROTON CDC13 (D:\NMR400\02T2) nmr 25

7.30  
7.30  
7.28  
7.26  
7.23  
7.21  
6.42  
6.38  
6.30  
6.27  
6.26  
6.24

4.26  
4.24  
4.24  
4.21  
3.91  
3.88  
3.70  
3.55

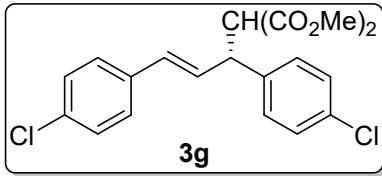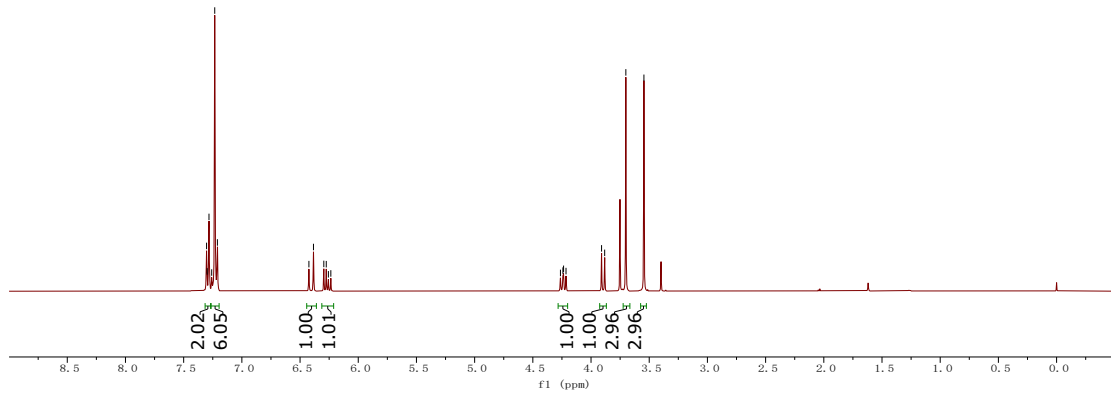

<sup>1</sup>H NMR of **3g**

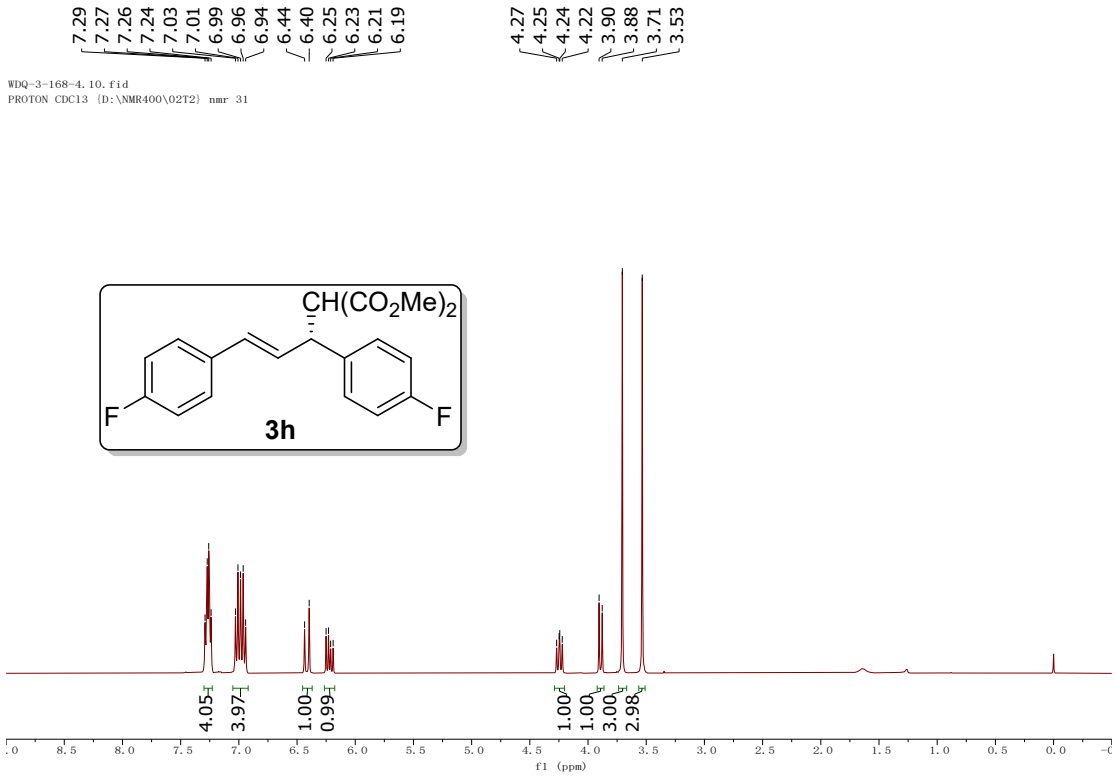

<sup>1</sup>H NMR of **3h**

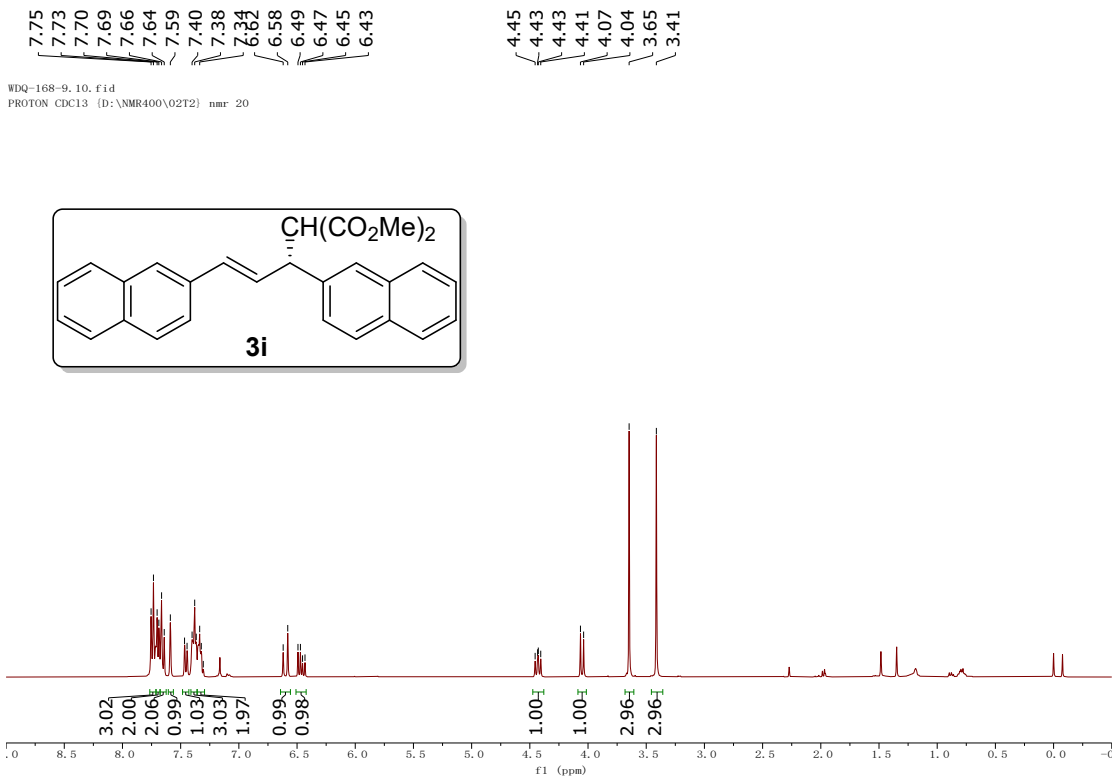

<sup>1</sup>H NMR of **3i**

WDQ-168-8. 10. F1d  
 PROTON CDC13 (D:\NMR400\02T2) nmr 19

7.19  
 7.18  
 7.14  
 7.13  
 7.12  
 6.93  
 6.92  
 6.65  
 6.61  
 6.20  
 6.18  
 6.16  
 6.14  
 4.55  
 4.53  
 4.51  
 3.90  
 3.88  
 3.71  
 3.62

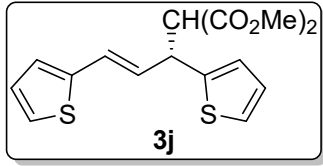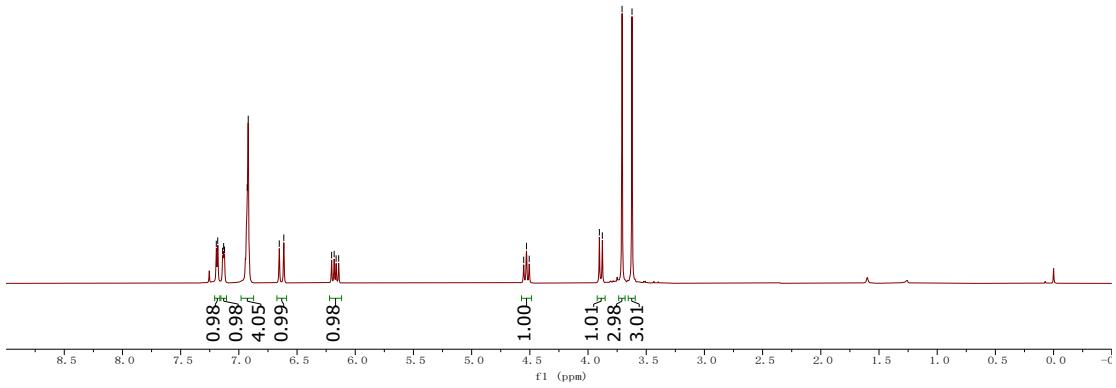

<sup>1</sup>H NMR of **3j**

167.72  
 167.58  
 143.16  
 141.48  
 127.85  
 127.35  
 126.90  
 126.06  
 125.54  
 124.90  
 124.53  
 124.50  
 58.45  
 52.72  
 52.70  
 44.08

WDQ-168-8  
 C13CPD CDC13 (D:\NMR400\02T2) nmr 19

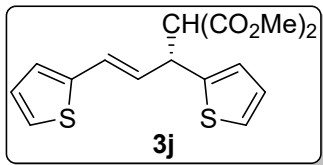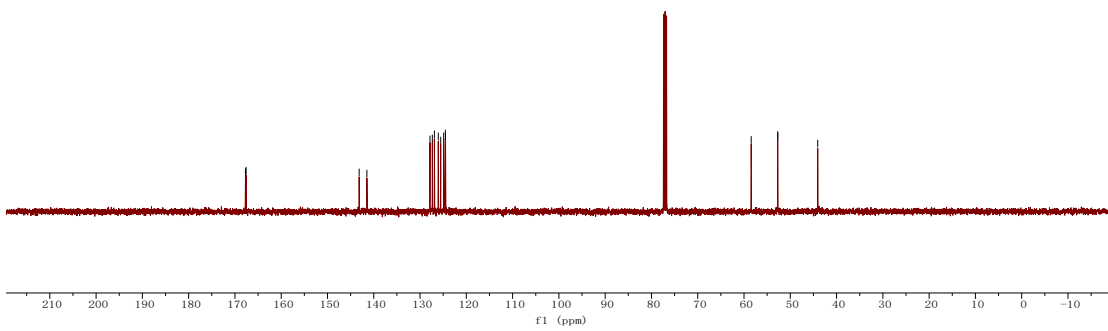

<sup>13</sup>C NMR of **3j**

7.46  
7.44  
7.38  
7.36  
7.35  
7.34  
7.31  
7.29  
7.27  
7.23  
6.61  
6.57  
6.38  
6.36  
6.34  
6.32

2022. 6. 11/苯胺  
2022. 4. 14-SQ44 HNMR

4.43  
4.41  
— 3.80

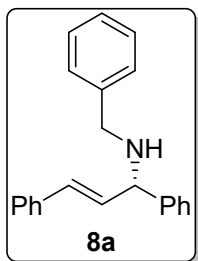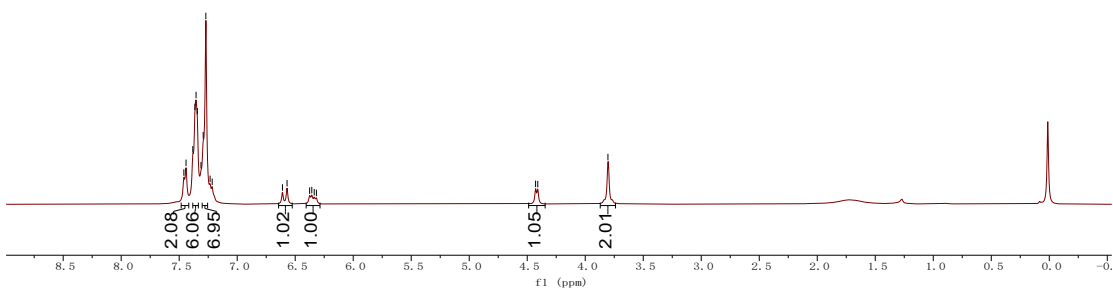

<sup>1</sup>H NMR of **8a**

7.44  
7.42  
7.38  
7.37  
7.32  
7.31  
7.29  
7.27  
7.25  
7.23  
6.62  
6.58  
6.34  
6.32  
6.31  
6.28

2022. 6. 11/sq124  
2022. 6. 8\_sq124

3.83  
3.81  
3.75  
3.74  
3.73  
2.59  
2.56  
2.43  
2.42

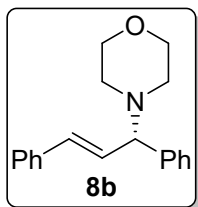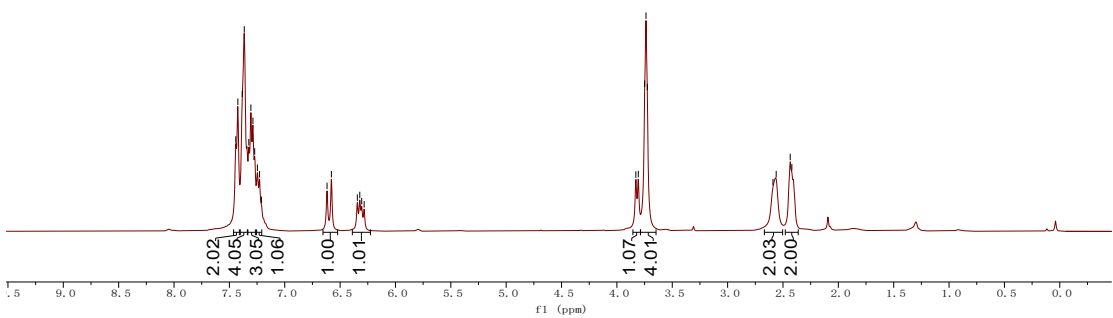

<sup>1</sup>H NMR of **8b**

7.44  
7.42  
7.39  
7.37  
7.35  
7.32  
7.30  
7.28  
7.27  
7.25  
6.59  
6.53  
6.41  
6.39  
6.37  
6.35

2022.6.11/sq102  
2022.6.8\_SQ74

3.86  
3.84

2.52  
2.40

1.61  
1.46

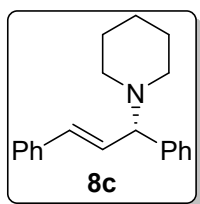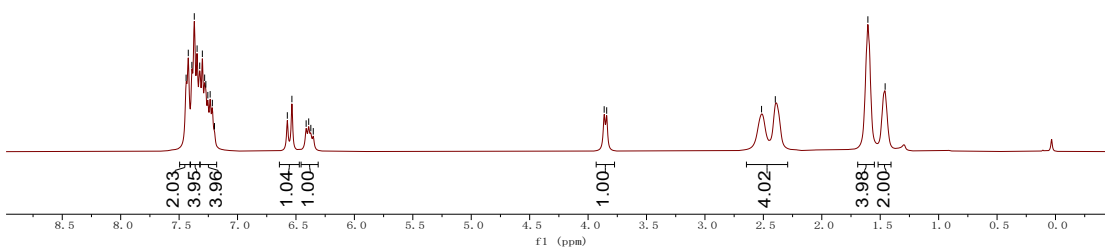

<sup>1</sup>H NMR of **8c**

7.46  
7.44  
7.38  
7.36  
7.34  
7.32  
7.31  
7.29  
7.27  
7.25  
6.61  
6.57  
6.48  
6.45  
6.44  
6.42

2022.6.11/sq122  
2022.6.8\_SQ122

3.80  
3.78

2.60  
2.58  
2.49  
2.47  
2.45  
1.82  
1.81  
1.79

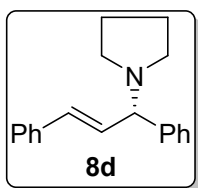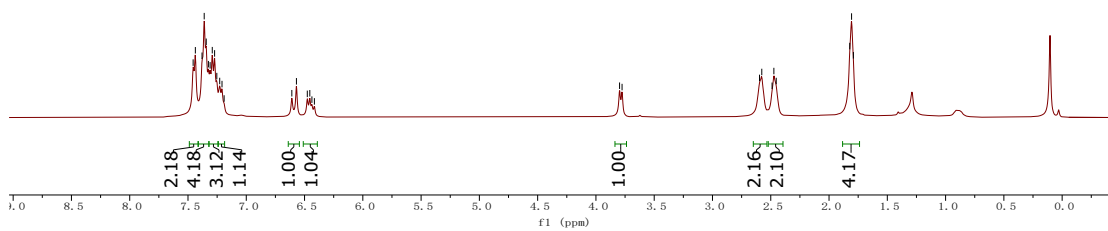

<sup>1</sup>H NMR of **8d**



7.47  
7.45  
7.40  
7.38  
7.33  
7.31  
7.30  
7.27  
7.18  
7.16  
6.74  
6.73  
6.71  
6.67  
6.65  
6.63  
6.45  
6.43  
6.41  
6.39  
5.12  
5.10  
— 4.18

2022. 6. 11/苯胺  
2022. 4. 18-SQ47 HNMR

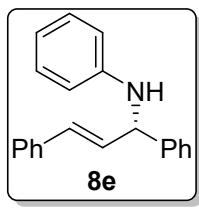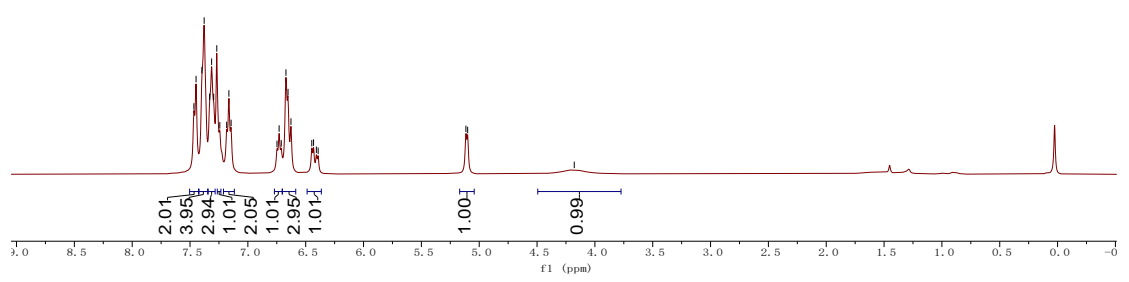

<sup>1</sup>H NMR of **8e**

7.51  
7.49  
7.43  
7.42  
7.37  
7.35  
7.33  
7.29  
7.28  
7.14  
7.12  
7.08  
7.06  
6.74  
6.72  
6.69  
6.65  
6.62  
6.51  
6.50  
6.47  
6.46  
5.20  
5.19  
4.01  
— 2.26

2022. 6. 11/sq123  
2022. 6. 8\_SQ123

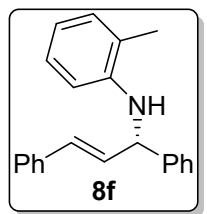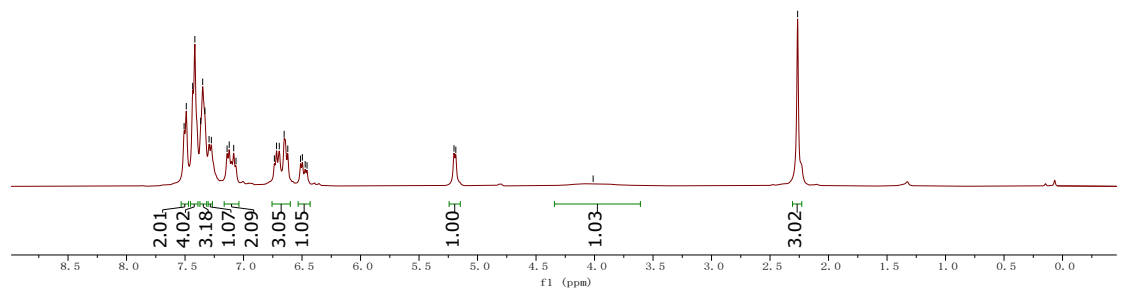

<sup>1</sup>H NMR of **8f**

145.18  
 142.24  
 136.72  
 131.24  
 131.00  
 130.09  
 128.91  
 128.62  
 127.77  
 127.57  
 127.22  
 127.11  
 126.61  
 122.17  
 117.43  
 111.43

2022. 6. 11/SQ 123 C13  
 2022. 6. 10-SQ123 CNMR

-60.62

-17.77

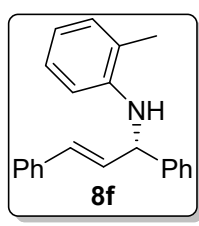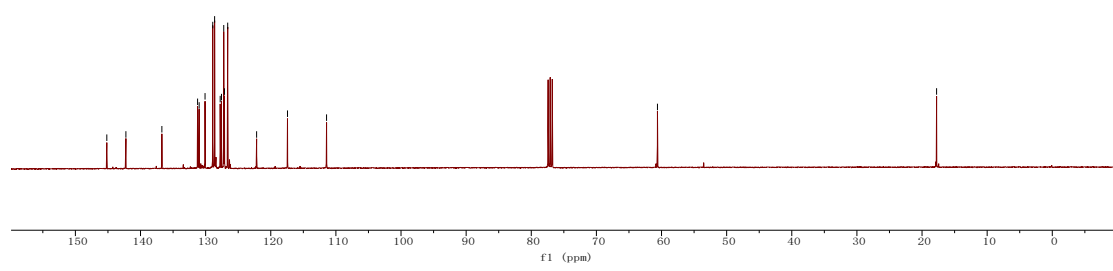

<sup>13</sup>C NMR of **8f**

7.47  
 7.41  
 7.34  
 7.27  
 7.10  
 7.08  
 7.06  
 6.70  
 6.66  
 6.60  
 6.58  
 6.52

5.14  
 5.12

2.30

2022. 6. 11/sq75  
 2022. 6. 8\_SQ75

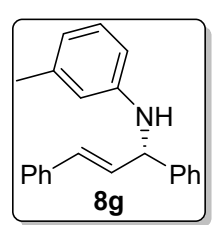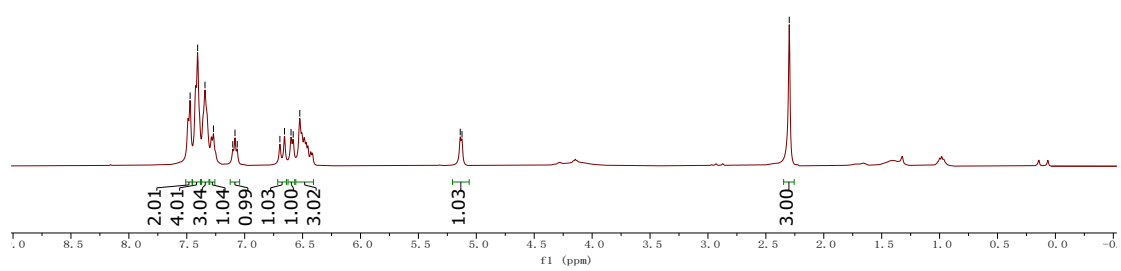

<sup>1</sup>H NMR of **8g**

138.96  
136.78  
131.05  
130.90  
129.12  
128.87  
128.61  
127.70  
127.56  
127.30  
118.59  
114.53  
110.72

2022. 6. 11/sq75 C13  
2022. 6. 10-SQ75 CNMR

-60.70

-21.69

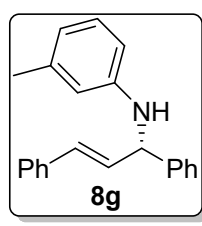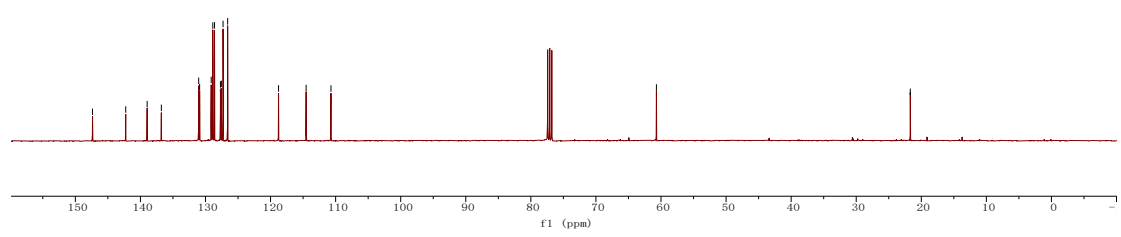

<sup>13</sup>C NMR of **8g**

7.49  
7.47  
7.40  
7.34  
7.29  
7.27  
7.02  
7.00  
6.69  
6.65  
6.62  
6.60  
6.47  
6.45  
6.43  
6.42  
5.11  
5.09

2022. 6. 11/sq71  
2022. 6. 8\_SQ71

-4.05

-2.27

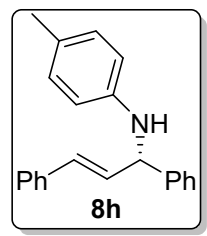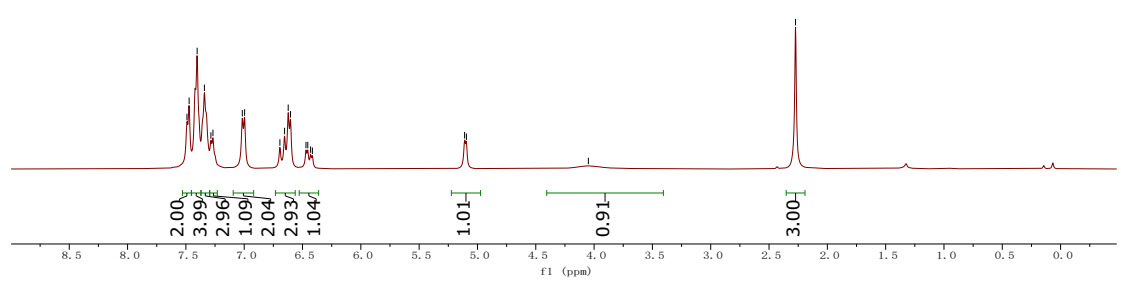

<sup>1</sup>H NMR of **8h**

7.49  
7.47  
7.41  
7.40  
7.38  
7.35  
7.33  
7.32  
7.28  
7.26  
6.80  
6.77  
6.69  
6.66  
6.65  
6.64  
6.46  
6.45  
6.43  
6.41  
5.06  
5.04

2022.6.11/sq100  
2022.6.8\_SQ100

— 3.76

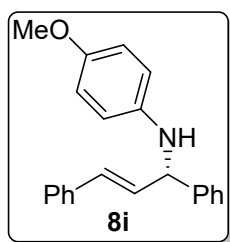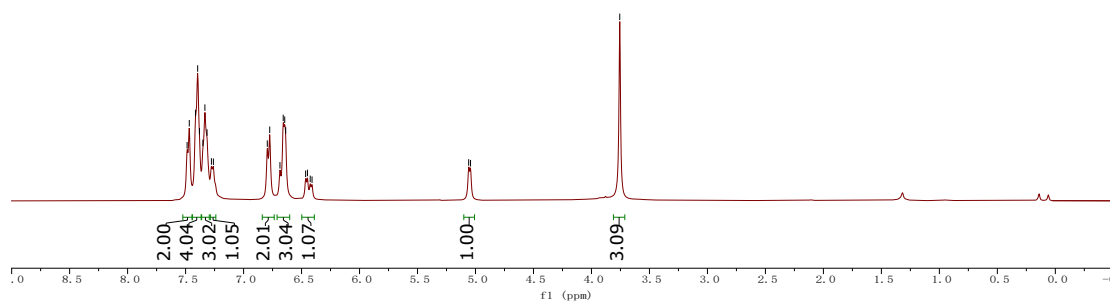

<sup>1</sup>H NMR of **8i**

7.39  
7.32  
7.25  
6.65  
6.61  
6.54  
6.52  
6.42  
6.40  
6.38  
6.36  
5.07  
5.05

2022.6.11/sq79  
2022.6.8\_SQ79

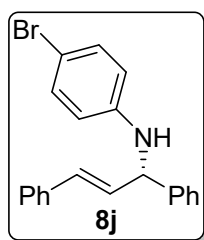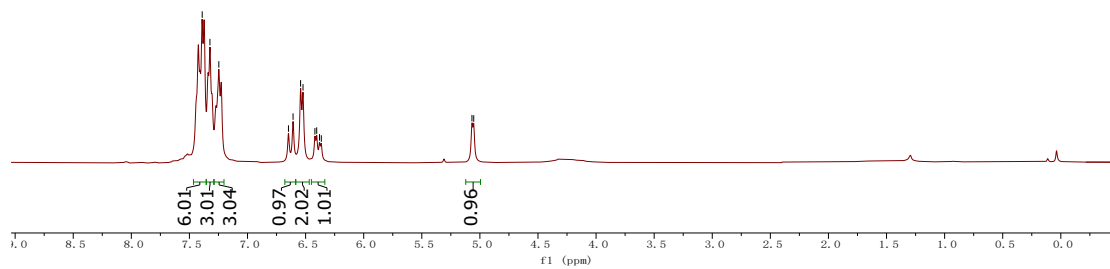

<sup>1</sup>H NMR of **8j**

2022. 6. 11/sq76  
 2022. 6. 8\_SQ76

7.45  
 7.39  
 7.33  
 7.28  
 6.90  
 6.88  
 6.86  
 6.61  
 6.44  
 6.43  
 6.40  
 6.39

5.06  
 5.04

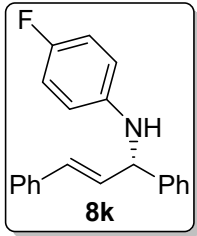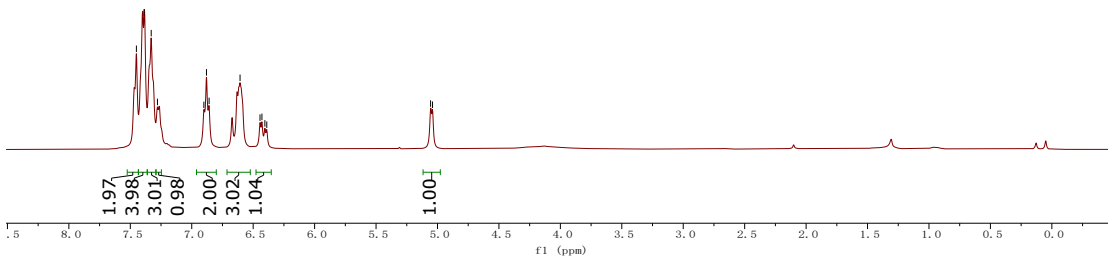

<sup>1</sup>H NMR of **8k**

2022. 6. 11/sq74  
 2022. 6. 8\_SQ74

7.47  
 7.41  
 7.35  
 7.29  
 7.27  
 6.71  
 6.67  
 6.44  
 6.35

5.14  
 5.13

2.27

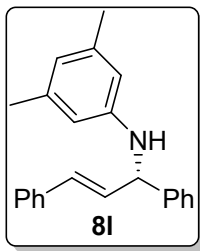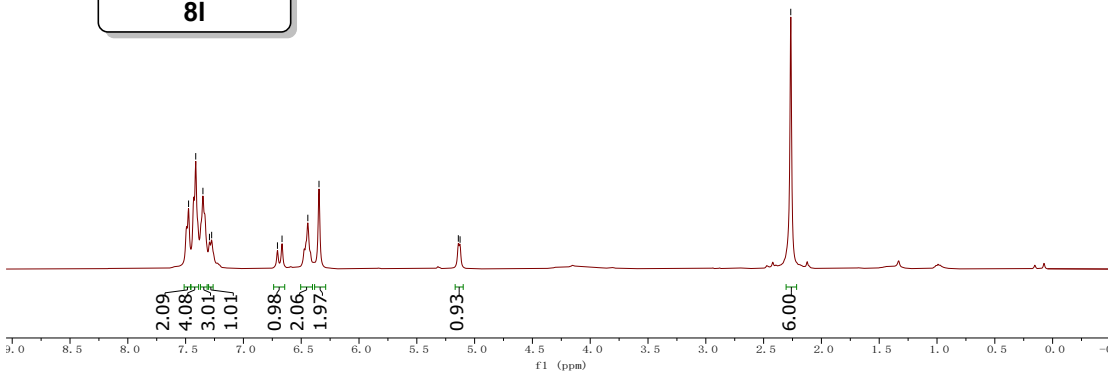

<sup>1</sup>H NMR of **8l**

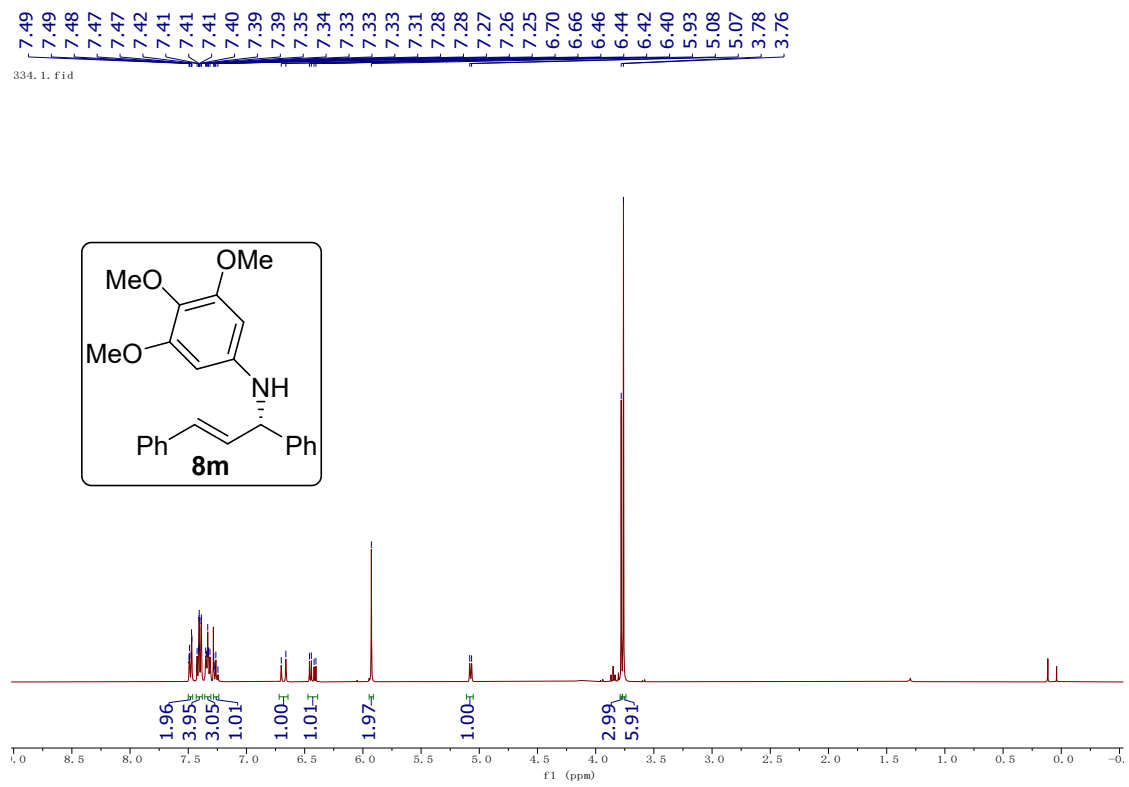

<sup>1</sup>H NMR of **8m**

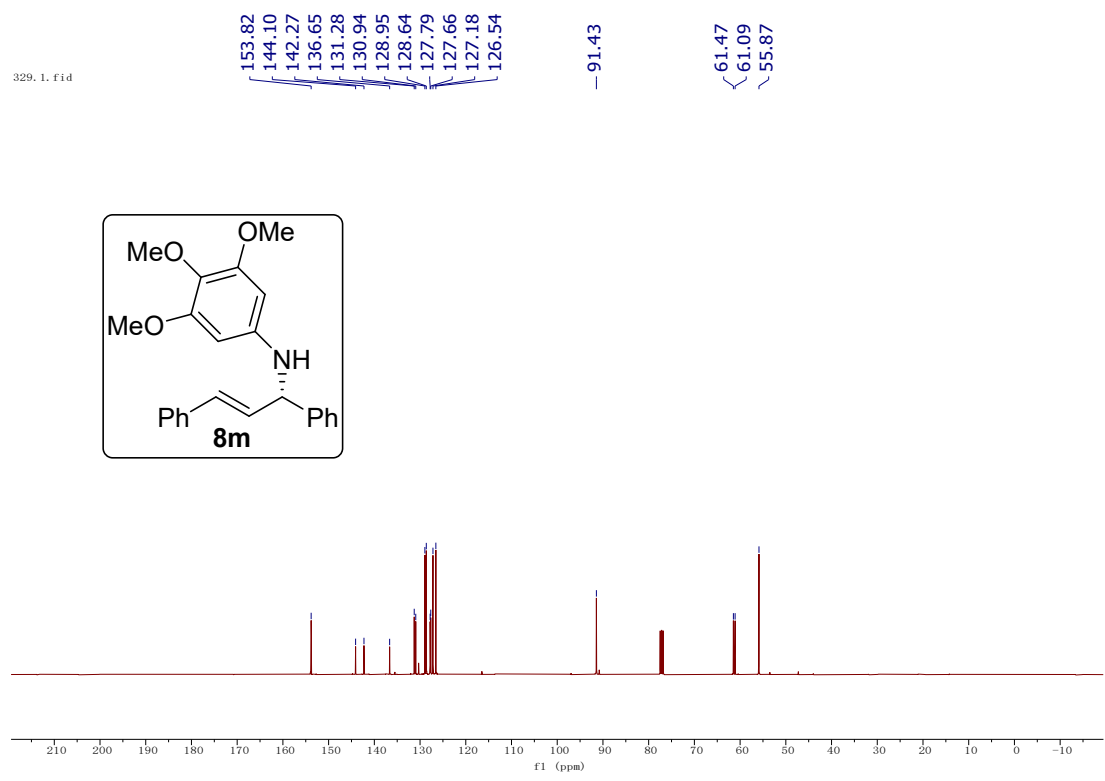

<sup>13</sup>C NMR of **8m**

335. 1. F1d

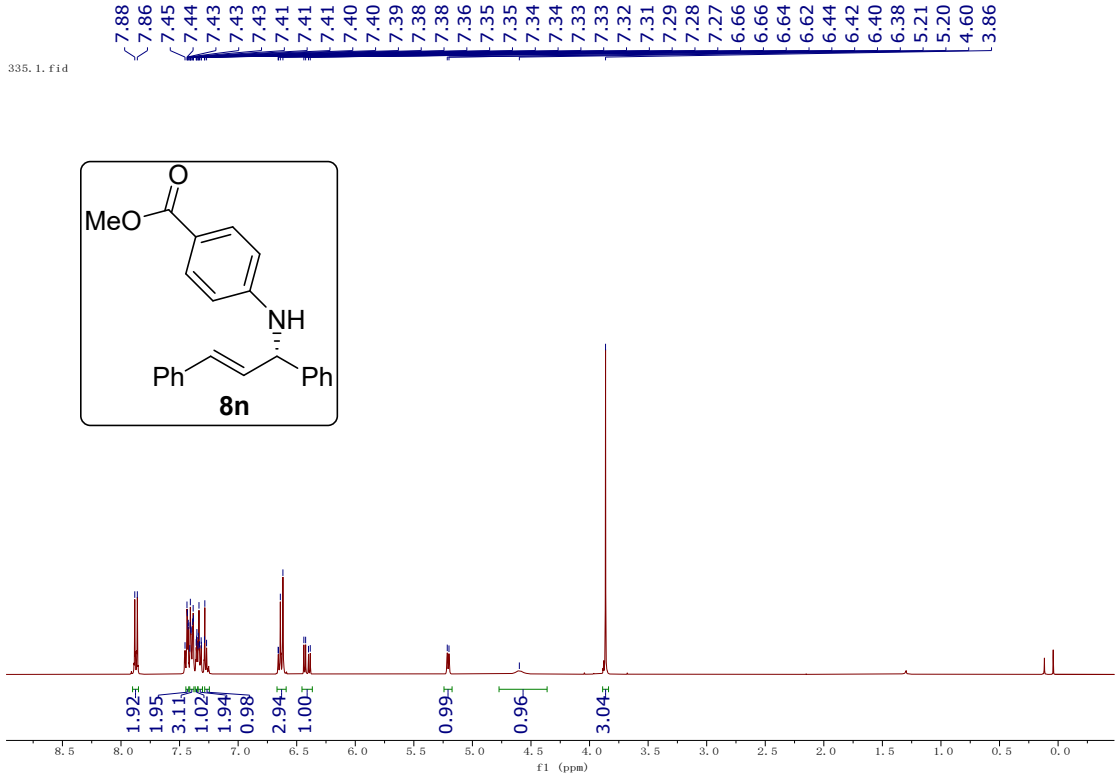

### <sup>1</sup>H NMR of **8n**

323. 1. F1d

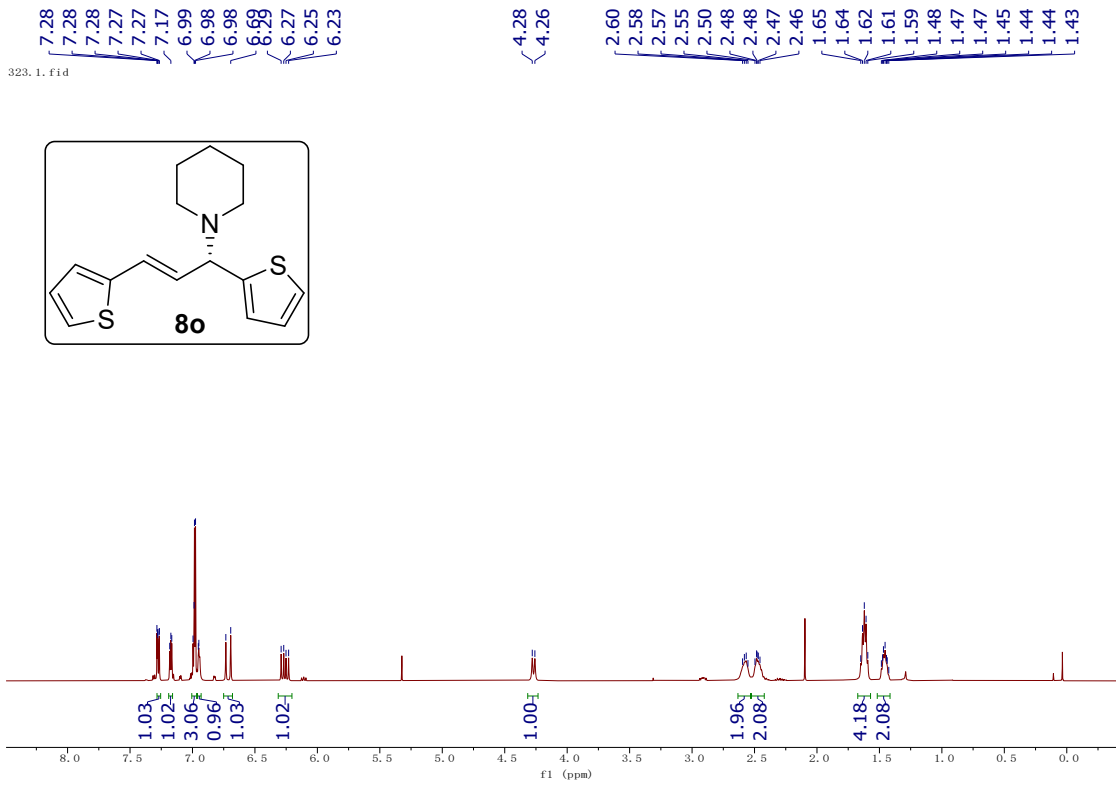

### <sup>1</sup>H NMR of **8o**

323.1.Fid

141.98  
129.48  
127.36  
126.47  
125.61  
125.46  
124.78  
124.74  
124.24

68.61

51.77

26.24  
24.62

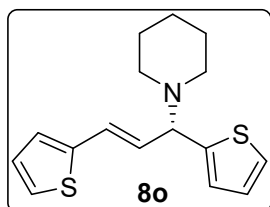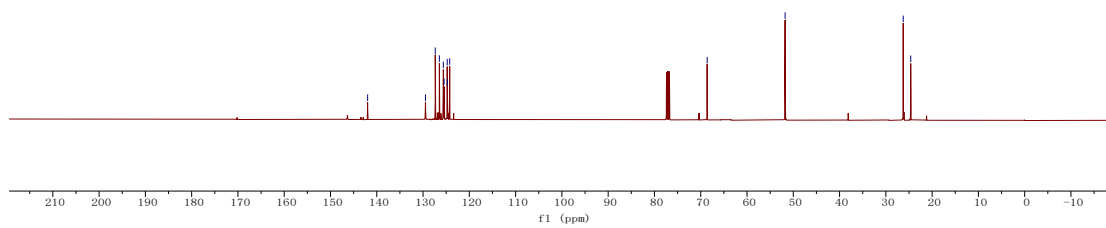

### <sup>13</sup>C NMR of **8o**



2022. 6. 11/ 苯醇  
 2022. 4. 14-SQ49 HNMR

7.46  
 7.44  
 7.41  
 7.39  
 7.37  
 7.33  
 7.31  
 7.29  
 7.27  
 7.24  
 6.66  
 6.62  
 6.38  
 6.36  
 6.34  
 6.32

5.04  
 5.02  
 — 4.59

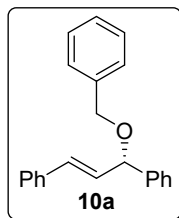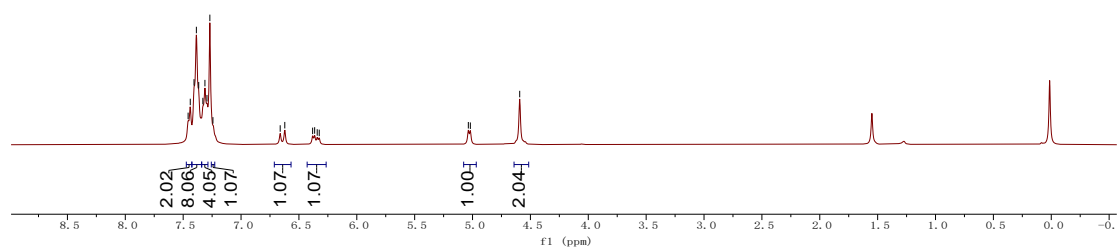

<sup>1</sup>H NMR of **10a**

2022. 6. 11/sq83  
 2022. 6. 8\_SQ83

7.48  
 7.43  
 7.35  
 7.25  
 6.72  
 6.68  
 6.43  
 6.41  
 6.39  
 6.37

5.08  
 5.06  
 4.65  
 4.62  
 4.60  
 4.57

— 2.38

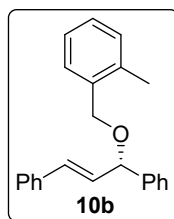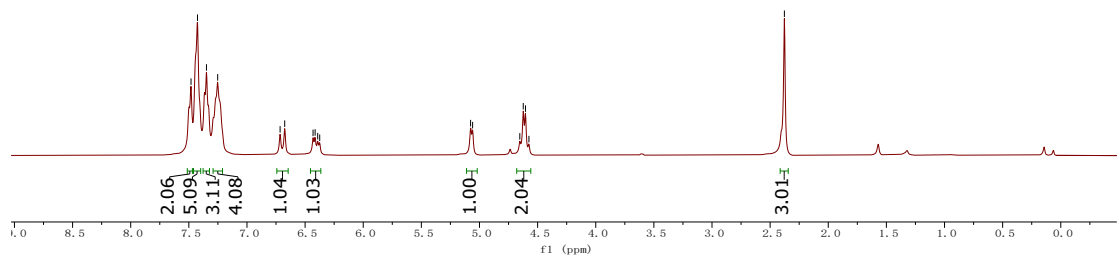

<sup>1</sup>H NMR of **10b**

2022.6.11/sq117  
2022.6.8\_SQ117

7.50  
7.49  
7.44  
7.42  
7.39  
7.36  
7.35  
7.33  
7.31  
6.73  
6.69  
6.42  
6.40  
6.38  
6.36

5.11  
5.09  
4.76  
4.72  
4.69  
4.65

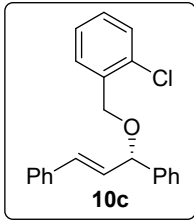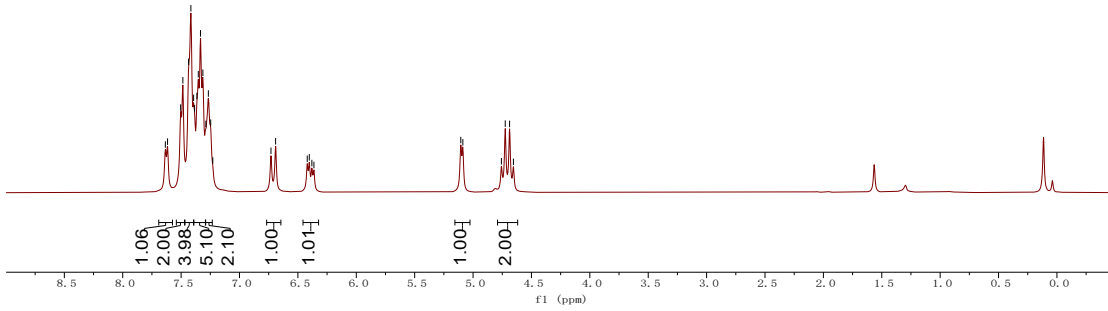

<sup>1</sup>H NMR of **10c**

2022.6.11/sq92  
2022.6.8\_SQ84

7.48  
7.46  
7.43  
7.41  
7.39  
7.35  
7.33  
7.31  
7.30  
7.28  
7.25  
7.00  
6.98  
6.88  
6.86  
6.69  
6.65  
6.41  
6.39  
6.37  
5.04

4.60

3.83

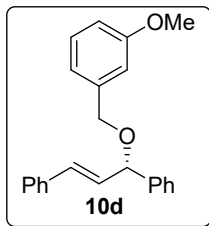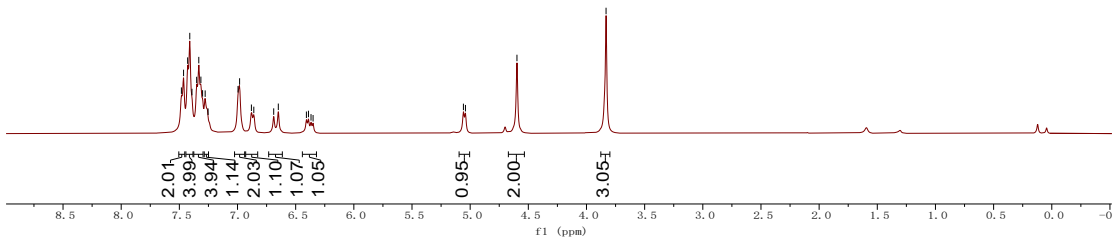

<sup>1</sup>H NMR of **10d**

2022.6.11/sq82  
2022.6.8\_SQ67

7.44  
7.39  
7.31  
7.29  
7.19  
6.66  
6.62  
6.38  
6.36  
6.34  
6.32

5.03  
5.01  
4.56

2.37

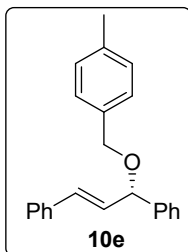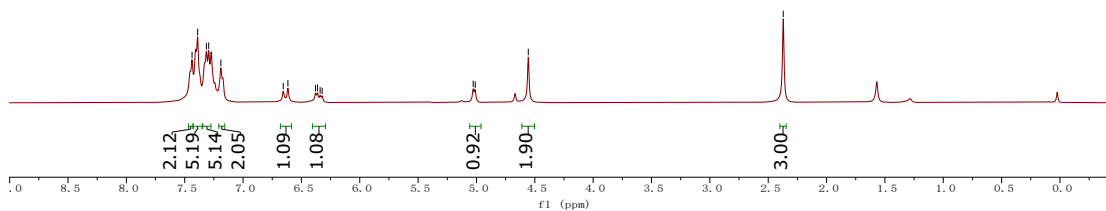

<sup>1</sup>H NMR of **10e**

2022.6.11/sq116  
2022.6.8\_SQ116

7.45  
7.43  
7.41  
7.40  
7.38  
7.33  
7.31  
7.27  
7.25  
7.23  
6.66  
6.62  
6.38  
6.36  
6.34  
6.32

5.02  
5.00  
4.59  
4.56  
4.55  
4.52

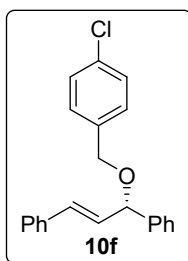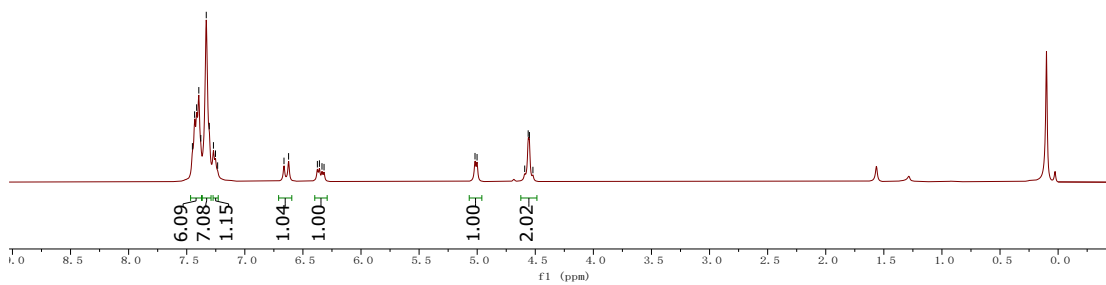

<sup>1</sup>H NMR of **10f**

7.47  
7.45  
7.42  
7.41  
7.39  
7.37  
7.35  
7.33  
7.31  
7.27  
7.26  
7.08  
7.06  
7.04  
6.67  
6.63  
6.39  
6.37  
6.35  
5.03  
5.02  
4.60  
4.57  
4.56  
4.53

2022. 6. 11/sq134  
2022. 6. 8\_SQ134

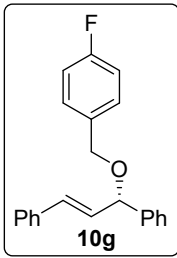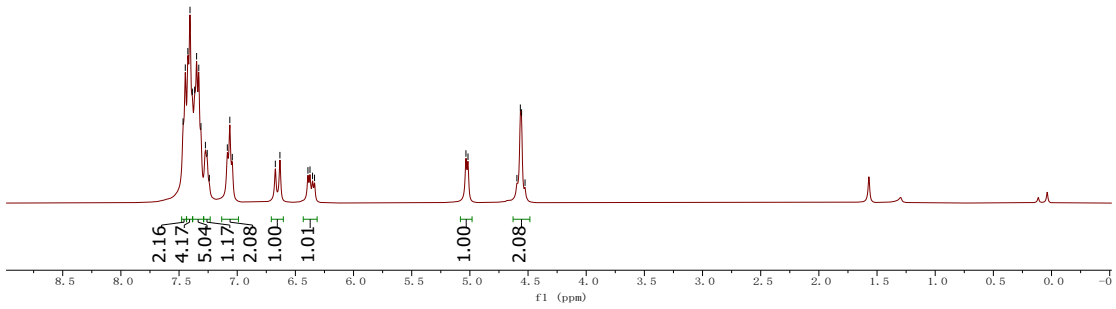

<sup>1</sup>H NMR of **10g**

7.47  
7.45  
7.42  
7.40  
7.34  
7.32  
7.31  
7.27  
7.25  
7.23  
6.93  
6.91  
6.66  
6.63  
6.40  
6.38  
6.36  
6.34  
5.04  
5.02  
4.54  
3.84

2022. 6. 11/sq125  
2022. 6. 8\_QH120

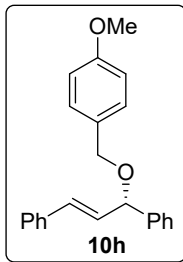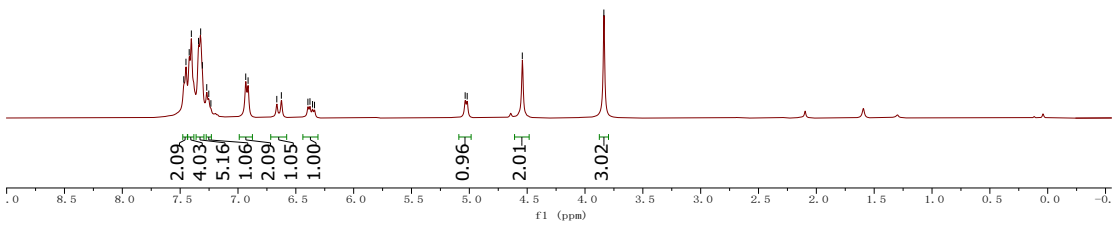

<sup>1</sup>H NMR of **10h**

2022. 6. 11/sq91  
2022. 6. 8\_SQ91

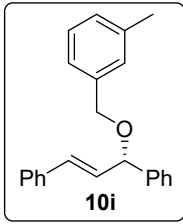

7.46  
7.40  
7.32  
7.27  
7.22  
7.14  
6.67  
6.63  
6.40  
6.38  
6.36  
6.34  
5.05  
5.03  
4.57  
2.38

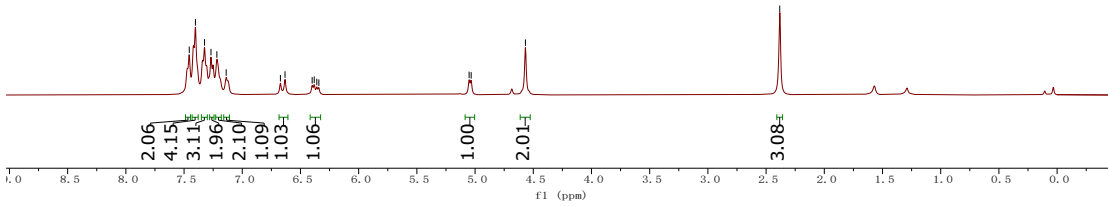

<sup>1</sup>H NMR of **10i**

7.88  
7.87  
7.85  
7.56  
7.54  
7.52  
7.51  
7.49  
7.44  
7.43  
7.41  
7.37  
7.36  
7.34  
7.32  
7.29  
7.27  
6.71  
6.67  
6.44  
6.43  
6.40  
6.39  
5.11  
5.09  
4.78

2022. 6. 11/sq131  
2022. 6. 8\_SQ131

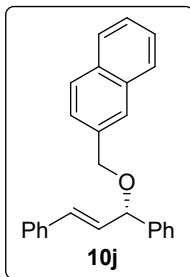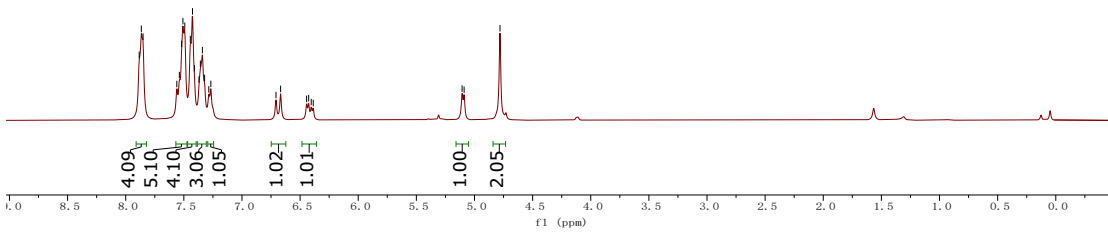

<sup>1</sup>H NMR of **10j**

7.46  
7.44  
7.42  
7.40  
7.38  
7.34  
7.32  
7.31  
7.27  
7.25  
6.67  
6.63  
6.38  
6.37  
6.35  
6.33  
5.07  
5.05  
— 4.54

2022.6.11/sq129  
2022.6.8\_SQ134

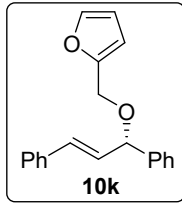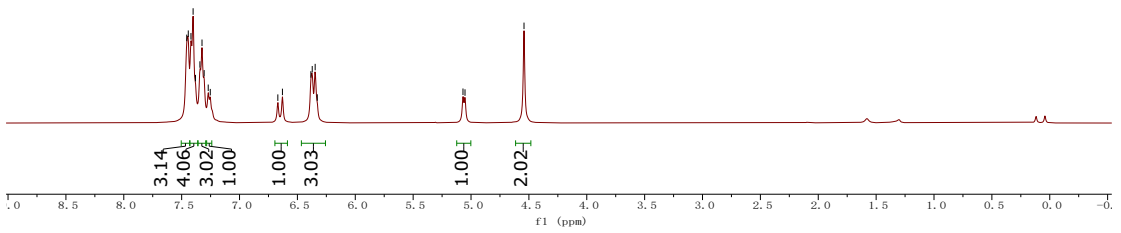

<sup>1</sup>H NMR of **10k**

8.56  
8.55  
7.76  
7.74  
7.72  
7.60  
7.58  
7.48  
7.46  
7.41  
7.39  
7.37  
7.33  
7.31  
7.29  
7.27  
7.26  
7.24  
7.22  
7.20  
6.72  
6.68  
6.40  
6.38  
6.36  
6.34  
5.12  
5.10  
4.80  
4.77  
4.73  
4.69

2022.6.11/sq130  
2022.6.8\_SQ130

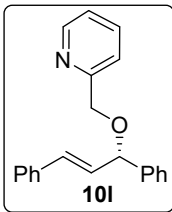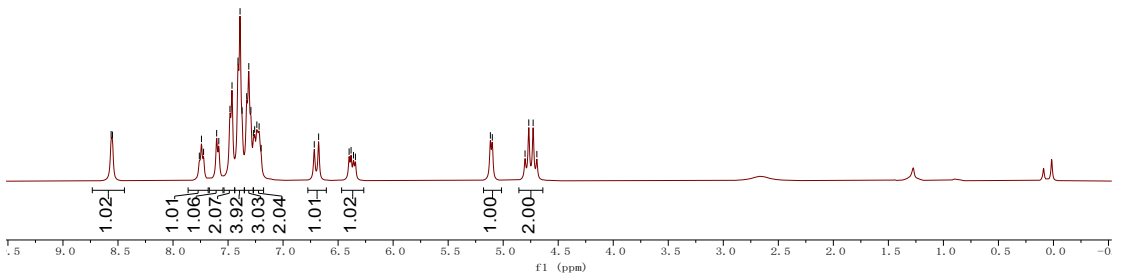

<sup>1</sup>H NMR of **10l**

1.1. F1d

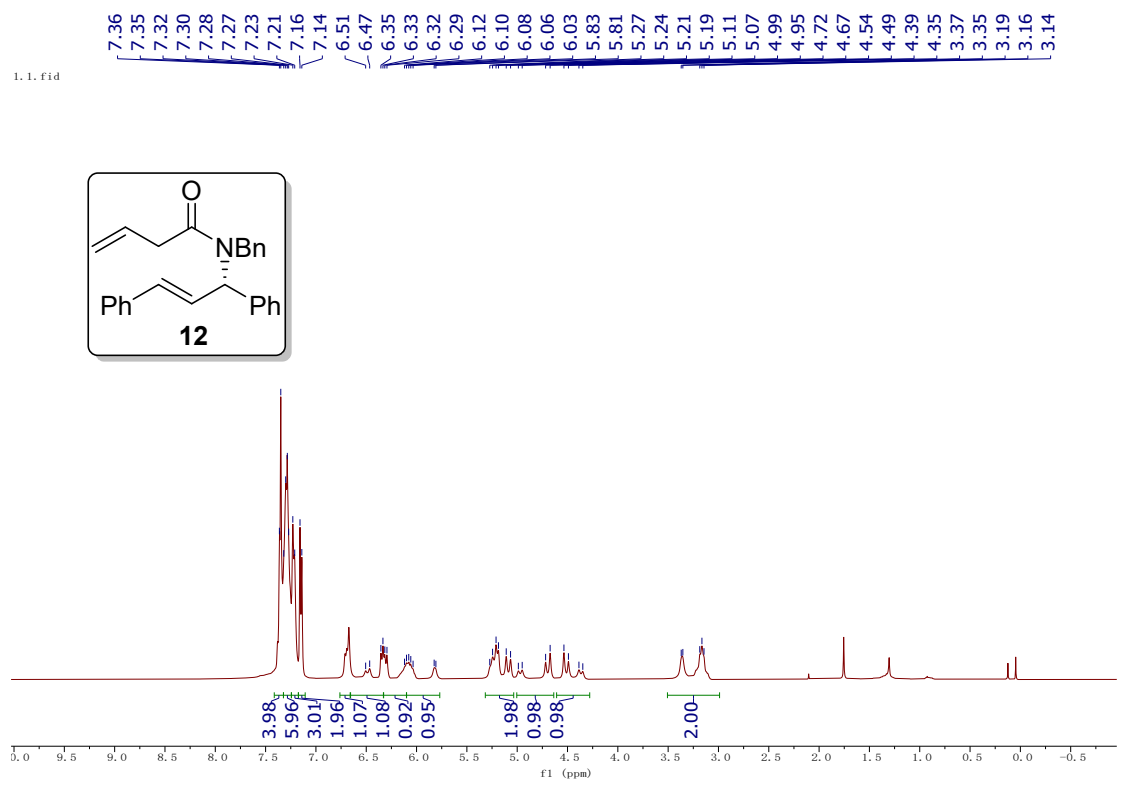

<sup>1</sup>H NMR of **12**
